# Supplementary material for: Asymmetric Dirhodium-Catalyzed Modification of Immunomodulatory Imide Drugs and Their Biological Assessment
Source: PubMed Central journal article supplement (PMC11403733; doi:10.1021/acsmedchemlett.4c00297), 2024-08-23
Supplement: ml4c00297_si_001.pdf [file ml4c00297_si_001.pdf]

# Asymmetric Dirhodium-Catalyzed Modification of Immunomodulatory Imide Drugs and their Biological Assessment

Supporting Information  
(92 Pages)

William F. Tracy,<sup>a</sup> Geraint H. M. Davies,<sup>b,†</sup> Lei Jia,<sup>c,†</sup> Ethan D. Evans,<sup>d</sup> Zhenghang Sun,<sup>c</sup> Jennifer Buenviaje,<sup>c</sup> Gody Khambatta,<sup>c</sup> Shan Yu,<sup>c</sup> Lihong Shi,<sup>c</sup> Veerabahu Shanmugasundaram,<sup>b</sup> Jesus Moreno\*,<sup>c</sup> Emily C. Cherney\*,<sup>c</sup> Huw M. L. Davies\*<sup>a</sup>

<sup>a</sup> Department of Chemistry, Emory University, Atlanta, Georgia 30322, United States

<sup>b</sup> Small Molecule Drug Discovery, Bristol Myers Squibb, Cambridge, Massachusetts 02140, United States

<sup>c</sup> Small Molecule Drug Discovery, Bristol Myers Squibb, San Diego, California 92121, United States

<sup>d</sup> Small Molecule Drug Discovery, Bristol Myers Squibb, Redwood City, California 94063, United States

<sup>e</sup> Small Molecule Drug Discovery, Bristol Myers Squibb, Princeton, New Jersey 08543, United States

\*Corresponding authors:

**Huw M. L. Davies** – Department of Chemistry, Emory University, Atlanta, Georgia 30322, United States; Email: [hmdavie@emory.edu](mailto:hmdavie@emory.edu)

**Emily C. Cherney** – Small Molecule Drug Discovery- Integrated Discovery Medicinal Chemistry, Bristol Myers Squibb, Princeton, New Jersey 08543, United States; Email: [emily.cherney@bms.com](mailto:emily.cherney@bms.com)

**Jesus Moreno** – Small Molecule Drug Discovery- Integrated Discovery Medicinal Chemistry, Bristol Myers Squibb, San Diego, California 92121, United States; Email: [jesus.moreno@bms.com](mailto:jesus.moreno@bms.com)

## Table of Contents

|                                                                    |     |
|--------------------------------------------------------------------|-----|
| Scheme S1. Catalyst screen for the cyclopropanation of 4.....      | S2  |
| Scheme S2. Combined chromatograms of the stereoisomers of 15b..... | S2  |
| Section 1: General Information.....                                | S3  |
| Section 2: Synthetic Procedures and Compound Characterization..... | S4  |
| Synthesis of Starting Materials.....                               | S4  |
| Figure S1. Aryl alkenes used in this study.....                    | S4  |
| Figure S2. Aryl alkynes used in this study.....                    | S4  |
| Figure S3. Aryl diazoacetates used in this study.....              | S5  |
| Synthesis of Final Compounds.....                                  | S5  |
| Section 3: X-ray Crystallographic Data for <i>R</i> -15a.....      | S18 |
| Section 4: Spectroscopic Data.....                                 | S29 |
| <sup>1</sup> H NMR Spectra.....                                    | S29 |
| <sup>13</sup> C{ <sup>1</sup> H} NMR Spectra.....                  | S39 |
| Section 5: Chromatographic Data.....                               | S48 |
| Chiral SFC Chromatograms.....                                      | S48 |
| Purity Chromatograms.....                                          | S72 |
| Section 6: Assay Protocols.....                                    | S89 |
| Section 7: Biological Data Tables.....                             | S90 |
| Section 8: References.....                                         | S92 |

## Scheme S1. Catalyst screen for the cyclopropanation of 4.

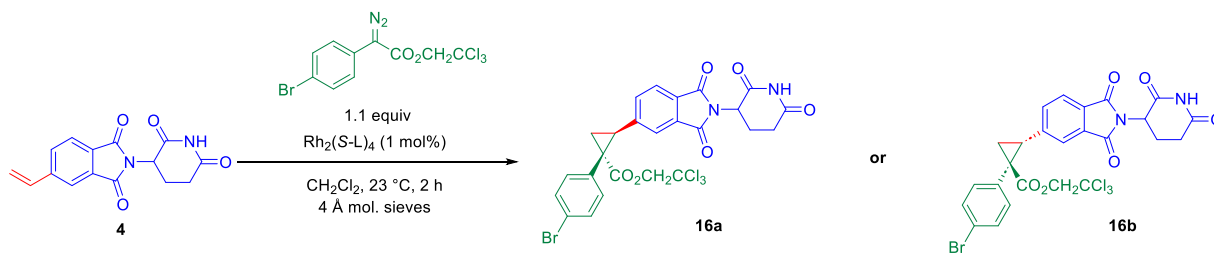

| Entry          | L                 | % yield | d.r. <sup>a</sup> | d.r. <sup>b</sup> (16x) |
|----------------|-------------------|---------|-------------------|-------------------------|
| 1              | TPPTTL            | 77      | >20:1             | 73:27 (16b)             |
| 2              | PTAD              | 80      | >20:1             | 87:13 (16a)             |
| 3 <sup>c</sup> | NTTL              | 82      | >20:1             | 95:5 (16b)              |
| 4              | <i>p</i> -Ph-TPCP | 72      | >20:1             | 99:1 (16a)              |

Reactions conducted on material in which the glutarimide stereocenter is racemic. Entries 1 and 3 gave the stereoisomers of product 16b, equivalent to those produced from the reaction with Rh<sub>2</sub>(*R*-*p*-Ph-TPCP)<sub>4</sub>. <sup>a</sup> Diastereomeric ratio for the relative configuration of the two new stereogenic centers, determined by <sup>1</sup>H NMR analysis. <sup>b</sup> Asymmetric induction arising from formation of the major relative diastereomer, determined by SFC analysis. <sup>c</sup> Reaction run with HFIP as solvent instead of CH<sub>2</sub>Cl<sub>2</sub>.

## Scheme S2. Combined chromatograms of the stereoisomers of 15b

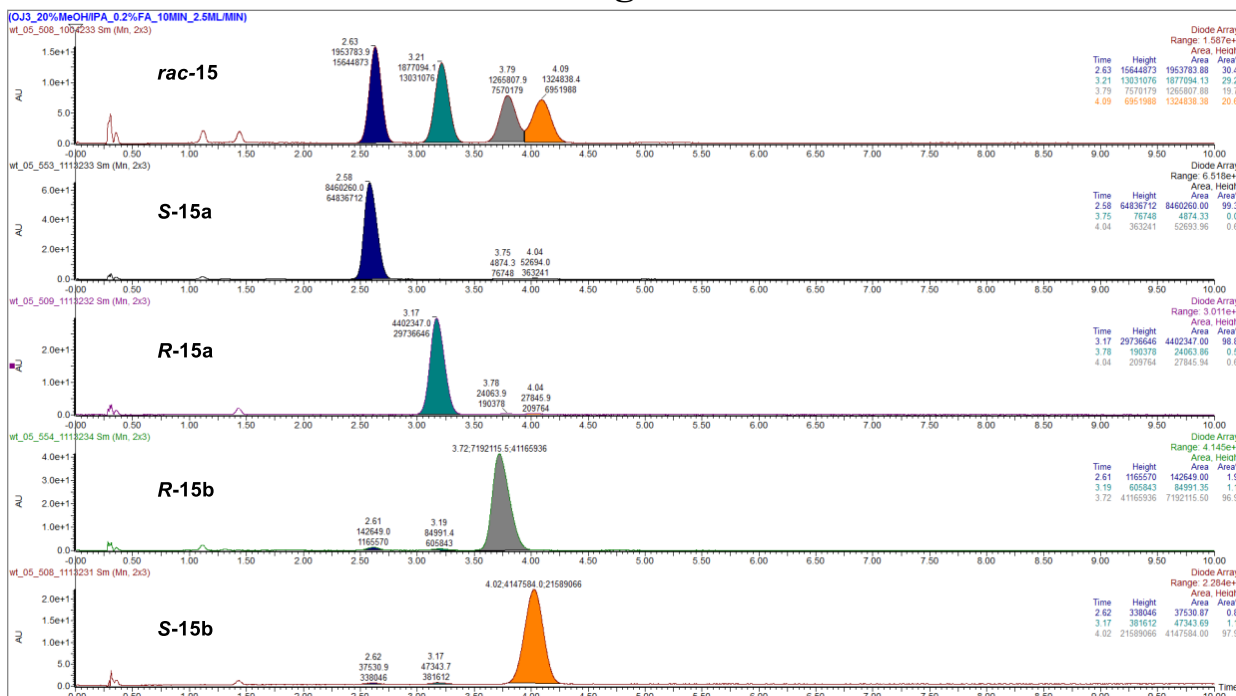

## Section 1: General Information

All reactions were conducted in flame-dried glassware under an inert atmosphere of dry nitrogen or argon, unless otherwise noted. All reagents were purchased from Oakwood, CombiBlocks, Millipore Sigma, Ambeed, and WuXi and used as received. Anhydrous dichloromethane was obtained from a Grubbs-type solvent purification system and further dried under an argon atmosphere for 24 hours over 4 Å molecular sieves. Molecular sieves were activated by heating under vacuum (<1 torr) for three hours at 300 °C.

Proton ( $^1\text{H}$ ) NMR spectra were recorded at 400 MHz on Varian and Bruker spectrometers, 500 MHz on an Inova-500 spectrometer, or 600 MHz on an Inova-600 spectrometer. Proton-decoupled carbon ( $^{13}\text{C}\{^1\text{H}\}$ ) NMR spectra were recorded at 100 MHz on Varian and Bruker spectrometers or 151 MHz on an Inova-600 spectrometer. NMR spectra were recorded in deuterated solvents and were referenced to tetramethylsilane (in the case of  $\text{CDCl}_3$ ) or the respective residual solvent signal. NMR chemical shifts were reported in parts per million (ppm). Abbreviations for signal couplings are as follows: s, singlet; d, doublet; t, triplet; q, quartet; quin, quintet; sex, sextet; sep, septet; and m, multiplet. The coupling constants were taken from the spectra directly and are uncorrected.

Mass spectrometric determinations were carried out on a Thermo Finnigan LTQ-FTMS spectrometer with atmospheric pressure chemical ionization (APCI), using a Fourier transform ion cyclotron resonance mass analyzer. Optical rotations were measured on a Rudolph Research Analytical Automatic Polarimeter, APIV-1W. Analytical thin layer chromatography was performed on silica gel plates using ultraviolet light to visualize analytes. Normal phase column chromatography was performed with SiliCycle silica gel 60 Å (50  $\mu\text{m}$ ) hand-packed in Biotage Sfaï columns on Biotage Isolera Four chromatographs, with SiliCycle silica gel 60 Å or Celite® as a dry-loading absorbent. Reverse phase chromatography was conducted using Teledyne ISCO RediSep Gold 18 reverse-phase columns using Teledyne ISCO CombiFlash or Biotage Isolera chromatographs. Supercritical fluid chromatography (SFC) analysis was performed on a Waters Acquity UPC2 instrument.

Purity of key compounds was assessed using SFC analysis (Waters Acquity UPC2 instrument), high-performance liquid chromatography analysis (HPLC) on an Agilent 1260 Infinity HPLC, or Waters AutoPurification System. All key compounds were  $\geq 95\%$  pure by HPLC or SFC analysis.

Dirhodium catalysts  $\text{Rh}_2(\text{S-p-Ph-TPCP})_4$ ,<sup>1</sup>  $\text{Rh}_2(\text{R-p-Ph-TPCP})_4$ ,<sup>1</sup>  $\text{Rh}_2(\text{S-tetra-p-Br-PPTL})_4$ ,<sup>2</sup> and  $\text{Rh}_2(\text{R-tetra-p-Br-PPTL})_4$ <sup>2</sup> were prepared according to their respective literature procedures. Racemic standards were prepared by using a 1:1 mixture of *R* and *S* catalyst under the same reaction conditions used to prepare enantioenriched compounds.

**Caution!** Glutarimide-containing compounds such as thalidomide are known reproductive, neurological, and hematological toxins. Care must be exercised to avoid direct contact with glutarimide-containing material; any glassware used with glutarimide-containing material should be treated with a 2 M aqueous solution of a strong base such as sodium hydroxide to destroy the material.

## Section 2: Synthetic Procedures and Compound Characterization

### Synthesis of Starting Materials

#### Preparation of Aryl Alkenes.

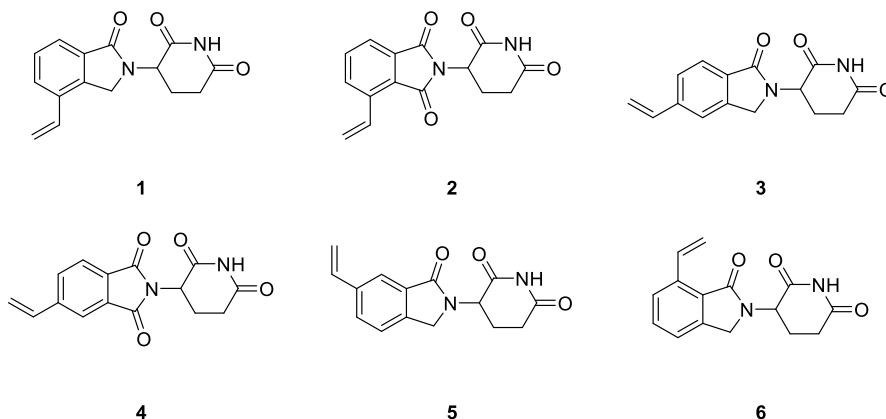

**Figure S1. Aryl alkenes used in this study**

Aryl alkenes **1-6** were prepared following the literature procedure,<sup>3</sup> in 84-93% yield.

#### Preparation of Aryl Alkynes.

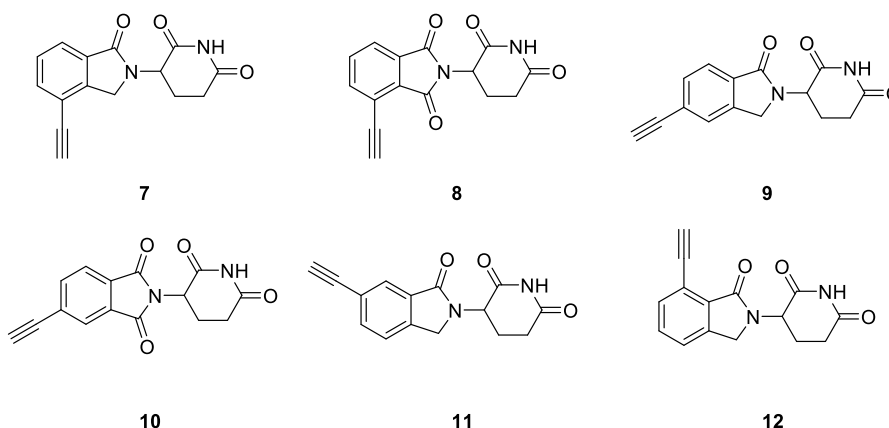

**Figure S2. Aryl alkynes used in this study**

Aryl alkynes **7-12** were prepared in 25-68% yield over two steps following an adapted patent procedure.<sup>4</sup> A flame-dried round-bottom flask was charged with aryl bromide (1.0 equiv), Pd(PPh<sub>3</sub>)<sub>2</sub>Cl<sub>2</sub> (10 mol%), diisopropylethylamine (3.0 equiv), and CuI (10 mol%) under inert atmosphere. Dry *N,N*-dimethylformamide (0.20 M) and ethynyltrimethylsilane (5.0 equiv) were charged by syringe, and the reaction was heated to 65 °C overnight. The reaction was concentrated under vacuum and dry-mounted onto silica gel, then purified by flash column chromatography. The isolated material was carried on to the next step without further purification.

The trimethylsilyl-protected alkyne was charged to a flame-dried flask under inert atmosphere. Dry tetrahydrofuran (THF, 0.15 M) was charged via syringe, and the solution was cooled to 0 °C in an ice bath. 1.0 M tetrabutylammonium fluoride in THF (1.2 equiv) was added over thirty minutes via syringe pump to the cooled reaction. The reaction was stirred for thirty minutes longer, after which the reaction was concentrated and purified by flash column chromatography.

### Preparation of Aryl Diazoacetates.

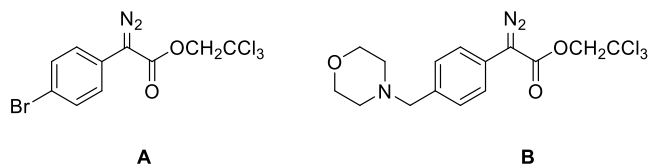

**Figure S3. Aryl diazoacetates used in this study**

2,2,2-trichloroethyl 2-(4-bromophenyl)-2-diazoacetate (**A**) was prepared via the literature procedure, in 90% yield.<sup>5</sup>

2,2,2-trichloroethyl 2-diazo-2-(4-(morpholinomethyl)phenyl)acetate (**B**) was prepared from 2-(4-(bromomethyl)phenyl)acetic acid in three steps. Following an adaptation of the literature procedure,<sup>5</sup> 2-(4-(bromomethyl)phenyl)acetic acid (1.0 g, 1.0 equiv, 4.4 mmol), 2,2,2-trichloroethanol (0.51 mL, 1.2 equiv, 5.2 mmol), and 4-(dimethylamino)pyridine (53 mg, 10 mol%, 0.44 mmol) were dissolved in dry CH<sub>2</sub>Cl<sub>2</sub> (10 mL), and cooled to 0 °C. A solution of dicyclohexylcarbodiimide (1.0 g, 4.8 mmol, 1.1 equiv) in CH<sub>2</sub>Cl<sub>2</sub> (5.7 mL) was added dropwise to the cooled reaction, which was allowed to stir and come to room temperature overnight. The reaction was filtered through Celite® to remove the white precipitate that had formed, rinsing with diethyl ether, and the filtrate was concentrated in vacuo. The material was filtered through a short plug of silica gel with diethyl ether, and concentrated in vacuo. The product obtained was used in the next step without further purification.

Following a procedure from the literature,<sup>6</sup> potassium carbonate (359 mg, 1.3 equiv, 2.6 mmol), morpholine (0.17 mL, 1.0 equiv, 2.0 mmol), and 2,2,2-trichloroethyl 2-(4-(bromomethyl)phenyl)acetate (793 mg, 1.1 equiv, 2.2 mmol) were combined in a flame-dried vial under inert atmosphere, dissolved in dry acetonitrile (6.7 mL), and stirred at room temperature overnight. The acetonitrile was removed in vacuo and the residue was partitioned between water and ethyl acetate. The aqueous layer was extracted thrice with ethyl acetate, after which the organic layers were washed with brine, dried over magnesium sulfate, and concentrated in vacuo. The material was filtered through a silica plug with diethyl ether. The product obtained was used in the next step without further purification.

Following the literature procedure,<sup>5</sup> 2,2,2-trichloroethyl 2-(4-(morpholinomethyl)phenyl)acetate (475 mg, 1 equiv, 1.3 mmol) and 2-nitrobenzenesulfonyl azide (443 mg, 1.5 equiv, 1.9 mmol) were taken up in dry acetonitrile (7.2 mL) and cooled to 0 °C. 2,3,4,6,7,8,9,10-octahydropyrimido[1,2-a]azepine (0.43 mL, 2.2 equiv, 2.9 mmol) was added dropwise to the cooled reaction. The reaction was allowed to stir for three hours at 0 °C, after which the reaction was quenched with a saturated solution of ammonium chloride in water. The reaction was extracted with three portions of diethyl ether. The combined organic layers were washed with brine, dried over magnesium sulfate, and concentrated in vacuo. The crude residue was purified via flash column chromatography (SiO<sub>2</sub>, 10-30% EtOAc in hexanes), which gave 2,2,2-trichloroethyl 2-diazo-2-(4-(morpholinomethyl)phenyl)acetate (345 mg, 0.88 mmol, 68% yield) as a yellow-orange amorphous solid.

<sup>1</sup>H NMR (400 MHz, CDCl<sub>3</sub>) δ 7.45 (d, *J* = 8.4 Hz, 1H), 7.38 (d, *J* = 8.3 Hz, 1H), 4.92 (s, 1H), 3.71 (t, *J* = 4.7 Hz, 3H), 3.49 (s, 1H), 2.44 (t, *J* = 4.7 Hz, 2H).

## Synthesis of Final Compounds

### General Cyclopropanation Procedure (GP 1)

A 10 mL round-bottom flask was charged with a PTFE magnetic stir bar and ca. 200% w/w 4 Å molecular sieves, then flame dried under vacuum. The flask was then backfilled with dry nitrogen. Rh<sub>2</sub>(*S*-p-Ph-TPCP)<sub>4</sub> (1 mol%) and the aryl alkene (1.0 equiv) were charged to the flask, and the flask was evacuated and backfilled with nitrogen. The flask was equipped with an argon balloon and rubber septum, and dry CH<sub>2</sub>Cl<sub>2</sub>

(0.2 M) was charged via syringe. A solution of 2,2,2-trichloroethyl 2-(4-bromophenyl)-2-diazoacetate (1.1 equiv) in dry CH<sub>2</sub>Cl<sub>2</sub> (0.2 M, prepared in the same manner under inert atmosphere) was added dropwise to the stirred reaction at room temperature. The reaction was allowed to stir for two hours, after which the reaction was filtered through Celite, rinsing the filter pad with CH<sub>2</sub>Cl<sub>2</sub>. The crude residue was dry-mounted onto silica gel and was purified by flash column chromatography (SiO<sub>2</sub>).

### General Cyclopropanation Procedure (GP 2)

A 10 mL round-bottom flask was charged with a PTFE magnetic stir bar and ca. 200% w/w 4 Å molecular sieves, then flame dried under vacuum. The flask was then backfilled with dry nitrogen. Rh<sub>2</sub>(*S*-p-Ph-TPCP)<sub>4</sub> (1 mol%) and the aryl alkyne (1.0 equiv) were charged to the flask, and the flask was evacuated and backfilled with nitrogen. The flask was equipped with an argon balloon and rubber septum, and dry CH<sub>2</sub>Cl<sub>2</sub> (0.2 M) was charged via syringe. A solution of 2,2,2-trichloroethyl 2-(4-bromophenyl)-2-diazoacetate (1.1 equiv) in dry CH<sub>2</sub>Cl<sub>2</sub> (0.2 M, prepared in the same manner under inert atmosphere) was added over 15 minutes to the stirred reaction at room temperature, via syringe pump. The reaction was allowed to stir for two hours, after which the reaction was filtered through Celite, rinsing the filter pad with CH<sub>2</sub>Cl<sub>2</sub>. The crude residue was dry-mounted onto silica gel and was purified by flash column chromatography (SiO<sub>2</sub>).

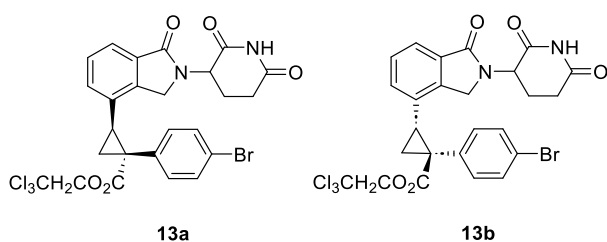

**2,2,2-trichloroethyl (1*R*,2*S*)-1-(4-bromophenyl)-2-(2-(2,6-dioxopiperidin-3-yl)-1-oxoisindolin-4-yl)cyclopropane-1-carboxylate (13a).**

**2,2,2-trichloroethyl (1*S*,2*R*)-1-(4-bromophenyl)-2-(2-(2,6-dioxopiperidin-3-yl)-1-oxoisindolin-4-yl)cyclopropane-1-carboxylate (13b).**

Compound **13a** was prepared following **GP 1**, using Rh<sub>2</sub>(*S*-p-Ph-TPCP)<sub>4</sub> (3.5 mg, 1 mol%, 2.0 μmol), 3-(1-oxo-4-vinylisindolin-2-yl)piperidine-2,6-dione (54 mg, 1.0 equiv, 0.20 mmol), 2,2,2-trichloroethyl 2-(4-bromophenyl)-2-diazoacetate (82 mg, 1.1 equiv, 0.22 mmol), and CH<sub>2</sub>Cl<sub>2</sub> (2 mL) at room temperature for two hours. Purification via flash column chromatography (SiO<sub>2</sub>, gradient of 40% to 100% EtOAc in hexanes) afforded 2,2,2-trichloroethyl (1*R*,2*S*)-1-(4-bromophenyl)-2-(2-(2,6-dioxopiperidin-3-yl)-1-oxoisindolin-4-yl)cyclopropane-1-carboxylate as an amorphous white solid. (78 mg, 0.12 mmol, 62% yield).

Compound **13b** was prepared in the same manner using Rh<sub>2</sub>(*R*-p-Ph-TPCP)<sub>4</sub>, which afforded 2,2,2-trichloroethyl (1*S*,2*R*)-1-(4-bromophenyl)-2-(2-(2,6-dioxopiperidin-3-yl)-1-oxoisindolin-4-yl)cyclopropane-1-carboxylate as an amorphous white solid. (77 mg, 0.12 mmol, 61% yield).

**HRMS** (APCI): *m/z* 612.9702 [(M+H)<sup>+</sup> requires 612.9694], calc'd for C<sub>25</sub>H<sub>20</sub><sup>79</sup>Br<sup>35</sup>Cl<sub>3</sub>N<sub>2</sub>O<sub>5</sub>

**<sup>1</sup>H NMR** (600 MHz, CDCl<sub>3</sub>, reported as a mixture of diastereomers) δ 8.26 and 8.25 (s, 1H), 7.655 and 7.652 (d, *J* = 7.6 Hz, 1H), 7.28 and 7.26 (d, *J* = 8.5 Hz, 2H, partially obscured by solvent signal), 7.16-7.10 (m, 1H), 6.89 and 6.86 (d, *J* = 8.5 Hz, 2H), 6.49 and 6.43 (d, *J* = 7.7 Hz, 1H), 5.29 and 5.26 (dd, *J* = 13.2, 5.2 Hz, 1H), 4.88 and 4.87 (d, *J* = 12.0 Hz, 1H), 4.66 and 4.65 (d, *J* = 12.0 Hz, 1H), 4.59 and 4.54 (d, *J* = 16.0 Hz, 1H), 4.39 and 4.37 (d, *J* = 16.0 Hz, 1H), 3.07 (dd, *J* = 9.3, 7.3 Hz, 1H), 2.98-2.81 (m, 2H), 2.40-2.20 (m, 3H), 2.12-2.06 (m, 1H).

**<sup>13</sup>C{<sup>1</sup>H} NMR** (126 MHz, CDCl<sub>3</sub>, reported as a mixture of diastereomers) δ 171.4, 171.1, 169.63, 169.59, 169.42, 169.37, 141.6, 133.3, 133.2, 132.3, 131.5, 131.4, 130.7, 129.0, 128.9, 128.4, 122.93, 122.91, 122.2, 74.4, 74.3, 52.1, 52.0, 46.4, 36.8, 36.7, 31.7, 29.9, 29.7, 23.7, 23.6, 19.8, 19.7.

**SFC analysis:** **13a** (Trefoil® AMY1, 25% 1:1 MeOH:PrOH with 0.2% formic acid in CO<sub>2</sub>, 2.5 mL/min, diode array) indicated 99:1 d.r.: *t<sub>R</sub>* (major diastereomers) = 2.89 and 4.82 min, *t<sub>R</sub>* (minor diastereomers) = 3.24 and 3.96 min. **13b** indicated the opposite diastereomers in 99:1 d.r.

**Purity** (SFC): **13a** – 99%; **13b** – 99%

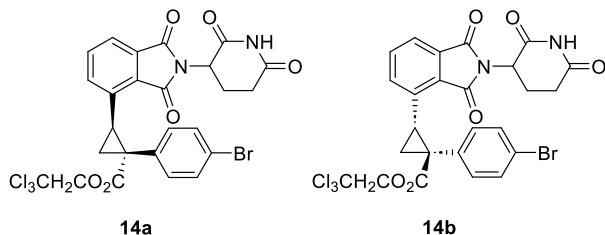

14a

14b

**2,2,2-trichloroethyl (1*R*,2*S*)-1-(4-bromophenyl)-2-(2-(2,6-dioxopiperidin-3-yl)-1,3-dioxoisindolin-4-yl)cyclopropane-1-carboxylate (14a).**

**2,2,2-trichloroethyl (1*S*,2*R*)-1-(4-bromophenyl)-2-(2-(2,6-dioxopiperidin-3-yl)-1,3-dioxoisindolin-4-yl)cyclopropane-1-carboxylate (14b).**

Compound **14a** was prepared following **GP 1**, using  $\text{Rh}_2(\text{S-p-Ph-TPCP})_4$  (3.5 mg, 1 mol%, 2.0  $\mu\text{mol}$ ), 2-(2,6-dioxopiperidin-3-yl)-4-vinylisindoline-1,3-dione (57 mg, 1.0 equiv, 0.20 mmol), 2,2,2-trichloroethyl 2-(4-bromophenyl)-2-diazoacetate (82 mg, 1.1 equiv, 0.22 mmol), and  $\text{CH}_2\text{Cl}_2$  (2 mL) at room temperature for two hours. Purification via flash column chromatography ( $\text{SiO}_2$ , gradient of 40% to 100% EtOAc in hexanes) afforded 2,2,2-trichloroethyl (1*R*,2*S*)-1-(4-bromophenyl)-2-(2-(2,6-dioxopiperidin-3-yl)-1,3-dioxoisindolin-4-yl)cyclopropane-1-carboxylate as an amorphous white solid. (40 mg, 62  $\mu\text{mol}$ , 31% yield).

Compound **14b** was prepared in the same manner using  $\text{Rh}_2(\text{R-p-Ph-TPCP})_4$ , which afforded 2,2,2-trichloroethyl (1*S*,2*R*)-1-(4-bromophenyl)-2-(2-(2,6-dioxopiperidin-3-yl)-1,3-dioxoisindolin-4-yl)cyclopropane-1-carboxylate as an amorphous white solid. (38 mg, 59  $\mu\text{mol}$ , 30% yield).

**HRMS (APCI):**  $m/z$  625.9417 ( $[\text{M}]^+$  requires 625.9422), calc'd for  $\text{C}_{25}\text{H}_{18}\text{BrCl}_3\text{N}_2\text{O}_6$ .

**$^1\text{H}$  NMR** (500 MHz,  $\text{CDCl}_3$ , reported as a mixture of diastereomers)  $\delta$  8.22 and 8.21 (s, 1H), 7.624 and 7.617 (dd,  $J = 7.40, 0.70$  Hz, 1H), 7.38-7.33 (m, 1H), 7.27 (d,  $J = 7.9$  Hz, 2H, partially obscured by solvent signal), 6.95 (t,  $J = 8.2$  Hz, 2H), 6.77 and 6.68 (d,  $J = 8.0$  Hz, 1H), 5.00 (dt,  $J = 12.4, 6.1$  Hz, 1H), 4.95 and 4.93 (d,  $J = 11.9$  Hz, 1H), 4.64 and 4.61 (d,  $J = 11.2$  Hz, 1H), 4.21-4.09 (m, 1H) 2.95-2.72 (m, 3H), 2.39 and 2.35 (dd,  $J = 9.1, 5.4$  Hz, 1H), 2.20-2.13 (m, 2H).

**$^{13}\text{C}\{^1\text{H}\}$  NMR** (101 MHz,  $\text{CDCl}_3$ , reported as a mixture of diastereomers)  $\delta$  171.1, 171.0, 170.9, 168.1, 168.0, 167.9, 166.95, 166.93, 136.3, 136.1, 134.0, 133.9, 133.2, 133.1, 132.4, 132.37, 132.32, 132.19, 132.17, 131.40, 131.37, 130.0, 129.8, 122.4, 122.3, 122.1, 122.0, 94.8, 74.81, 74.76, 49.5, 37.1, 36.8, 31.5, 29.5, 29.0, 22.8, 22.7, 19.7, 19.3.

**SFC analysis:** **14a** (Chiralcel® OX-3, 35% 1:1 MeOH:PrOH with 0.2% formic acid in  $\text{CO}_2$ , 2.5 mL/min, diode array) indicated >99:1 d.r.:  $t_R$  (major diastereomers) = 2.16 and 2.36 min,  $t_R$  (minor diastereomers) = 4.09 and 7.32 min. **14b** indicated the opposite diastereomers in 99:1 d.r.

**Purity (SFC):** **14a** – 99%; **14b** – 96%

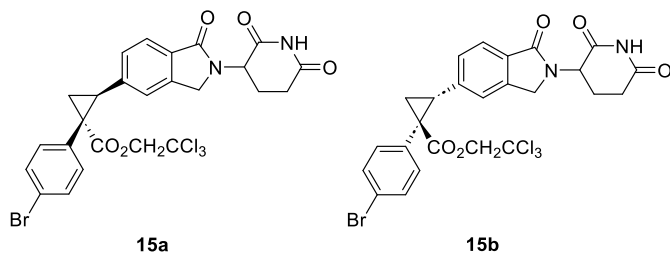

15a

15b

**2,2,2-trichloroethyl (1*R*,2*S*)-1-(4-bromophenyl)-2-(2-(2,6-dioxopiperidin-3-yl)-1-oxoisindolin-5-yl)cyclopropane-1-carboxylate (15a).**

**2,2,2-trichloroethyl (1*S*,2*R*)-1-(4-bromophenyl)-2-(2-(2,6-dioxopiperidin-3-yl)-1-oxoisindolin-5-yl)cyclopropane-1-carboxylate (15b).**

Compound **15a** was prepared following **GP 1**, using  $\text{Rh}_2(\text{S-p-Ph-TPCP})_4$  (3.5 mg, 1 mol%, 2.0  $\mu\text{mol}$ ), 3-(1-oxo-5-vinylisindolin-2-yl)piperidine-2,6-dione (54 mg, 1.0 equiv, 0.20 mmol), 2,2,2-trichloroethyl 2-(4-bromophenyl)-2-diazoacetate (82 mg, 1.1 equiv, 0.22 mmol), and  $\text{CH}_2\text{Cl}_2$  (2 mL) at room temperature for two hours. Purification via flash column chromatography ( $\text{SiO}_2$ , gradient of 25% to 75% EtOAc in hexanes)



afforded 2,2,2-trichloroethyl (1*R*,2*S*)-1-(4-bromophenyl)-2-(2-(2,6-dioxopiperidin-3-yl)-1-oxoisindolin-5-yl)cyclopropane-1-carboxylate as an amorphous white solid. (95 mg, 0.16 mmol, 77% yield).

Compound **15b** was prepared in the same manner using Rh<sub>2</sub>(*R*-p-Ph-TPCP)<sub>4</sub>, which afforded 2,2,2-trichloroethyl (1*S*,2*R*)-1-(4-bromophenyl)-2-(2-(2,6-dioxopiperidin-3-yl)-1-oxoisindolin-5-yl)cyclopropane-1-carboxylate as an amorphous white solid. (97 mg, 0.16 mmol, 79% yield).

**HRMS (APCI):** *m/z* 612.9702 [(M+H)<sup>+</sup> requires 612.9686], calc'd for C<sub>25</sub>H<sub>20</sub>BrCl<sub>3</sub>N<sub>2</sub>O<sub>5</sub>

<sup>1</sup>H NMR (500 MHz, CDCl<sub>3</sub>, reported as a mixture of diastereomers) 8.42 (s, 1H), 7.60 (12.0, 8.0 Hz, 1H), 7.28 and 7.27 (d, *J*=8.5 Hz, 2H), 6.96-6.93 (m, 3H), 6.86-6.85 (m, 1H), 5.16 (ddd, *J*=18.0, 13.3, 5.2 Hz), 4.83 and 4.81 (d, *J*=2.8 Hz, 1H), 4.66 and 4.64 (d, *J*=3.2 Hz, 1H), 4.34 and 4.31 (d, *J*=16.0 Hz, 1H), 4.21 and 4.10 (d, 16.0 Hz, 1H), 3.29 (dd, *J*=9.4, 7.2 Hz, 1H), 2.89-2.76 (m, 2H), 2.36-2.23 (m, 2H), 2.23-2.18 (m, 1H), 2.03-2.00 (m, 1H).

<sup>13</sup>C{<sup>1</sup>H} NMR (101 MHz, CDCl<sub>3</sub>, reported as a mixture of diastereomers) δ 171.33, 171.30, 171.3, 169.72, 169.66, 169.0, 141.50, 141.48, 140.4, 133.7, 133.6, 132.5, 132.4, 131.46, 131.38, 130.33, 130.27, 128.7, 128.3, 123.8, 122.9, 122.4, 122.1, 122.0, 94.9, 74.6, 52.0, 51.8, 47.0, 46.8, 37.4, 37.3, 33.9, 33.8, 31.6, 23.54, 23.47, 20.91, 20.86.

**SFC analysis:** **15a** (Chiralcel® OJ-3, 30% 1:1 MeOH:<sup>i</sup>PrOH with 0.2% formic acid in CO<sub>2</sub>, 2.5 mL/min, diode array) indicated >99:1 d.r.: *t*<sub>R</sub> (major diastereomers) = 2.72 and 4.60 min, *t*<sub>R</sub> (minor diastereomers) = 3.38 and 3.98 min. **15b** indicated the opposite diastereomers in >99:1 d.r.

**Purity (SFC):** **15a** – 99%; **15b** – 99%

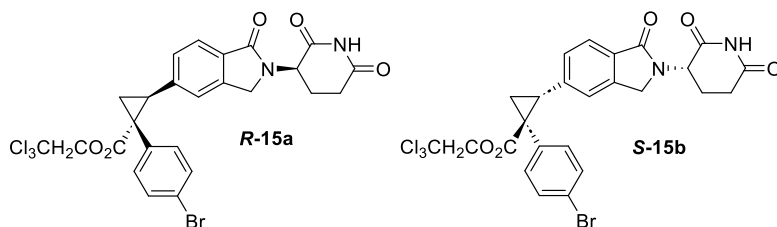

**2,2,2-trichloroethyl (1*R*,2*S*)-1-(4-bromophenyl)-2-(2-((*R*)-2,6-dioxopiperidin-3-yl)-1-oxoisindolin-5-yl)cyclopropane-1-carboxylate (**R-15a**).**

**2,2,2-trichloroethyl (1*S*,2*R*)-1-(4-bromophenyl)-2-(2-((*S*)-2,6-dioxopiperidin-3-yl)-1-oxoisindolin-5-yl)cyclopropane-1-carboxylate (**S-15b**).**

Compound **S-15a** was prepared following **GP 1**, using Rh<sub>2</sub>(*S*-p-Ph-TPCP)<sub>4</sub> (3.5 mg, 1 mol%, 2.0 μmol), (*S*)-3-(1-oxo-5-vinylisindolin-2-yl)piperidine-2,6-dione (54 mg, 1.0 equiv, 0.20 mmol), 2,2,2-trichloroethyl 2-(4-bromophenyl)-2-diazoacetate (82 mg, 1.1 equiv, 0.22 mmol), and CH<sub>2</sub>Cl<sub>2</sub> (2 mL) at room temperature for two hours. Purification via flash column chromatography (SiO<sub>2</sub>, gradient of 25% to 75% EtOAc in hexanes) afforded 2,2,2-trichloroethyl (1*R*,2*S*)-1-(4-bromophenyl)-2-(2-((*S*)-2,6-dioxopiperidin-3-yl)-1-oxoisindolin-5-yl)cyclopropane-1-carboxylate as an amorphous white solid. (115 mg, 0.19 mmol, 94% yield).

Compound **R-15b** was prepared in the same manner using (*R*)-3-(1-oxo-5-vinylisindolin-2-yl)piperidine-2,6-dione and Rh<sub>2</sub>(*R*-p-Ph-TPCP)<sub>4</sub>, which afforded 2,2,2-trichloroethyl (1*S*,2*R*)-1-(4-bromophenyl)-2-(2-((*R*)-2,6-dioxopiperidin-3-yl)-1-oxoisindolin-5-yl)cyclopropane-1-carboxylate as an amorphous white solid. (117 mg, 0.19 mmol, 95% yield).

<sup>1</sup>H NMR (400 MHz, CDCl<sub>3</sub>) δ 8.00 (s, 1H), 7.61 (d, *J* = 7.9 Hz, 1H), 7.29 (d, *J* = 8.5 Hz, 2H), 7.00 – 6.91 (m, 3H), 6.87 (dd, *J* = 7.9, 1.5 Hz, 1H), 5.15 (dd, *J* = 13.2, 5.2 Hz, 1H), 4.83 (d, *J* = 11.9 Hz, 1H), 4.65 (d, *J* = 11.9 Hz, 1H), 4.32 (d, *J* = 16.0 Hz, 1H), 4.22 (d, *J* = 16.0 Hz, 1H), 3.30 (dd, *J* = 9.3, 7.4 Hz, 1H), 2.94 – 2.87 (m, 1H), 2.87-2.73 (m, 1H), 2.41 – 2.26 (m, 2H), 2.25-2.13 (m, 1H), 2.06 – 1.95 (m, 1H).

<sup>13</sup>C{<sup>1</sup>H} NMR (101 MHz, CDCl<sub>3</sub>) δ 171.5, 171.3, 169.8, 168.9, 141.5, 140.4, 133.6, 132.3, 131.3, 130.3, 128.2, 123.7, 122.9, 122.0, 94.9, 74.5, 51.9, 47.0, 37.3, 33.8, 31.6, 23.4, 20.9.

**SFC analysis:** **S-15a** (Chiralcel® OJ-3, 30% 1:1 MeOH:<sup>i</sup>PrOH with 0.2% formic acid in CO<sub>2</sub>, 2.5 mL/min, diode array) indicated 98:2 d.r.: *t*<sub>R</sub> (major diastereomers) = 4.08 min (peak representing minor enantiomer of **S-15a** n.d.), *t*<sub>R</sub> (minor diastereomers) = 2.64 and 3.22 min. **R-15b** indicated the opposite diastereomers in 96:4 d.r.

**Specific rotation:** **S-15a**  $[\alpha]_D^{22}$  12.7 (c 1, CHCl<sub>3</sub>) **R-15b**  $[\alpha]_D^{22}$  -17.6 (c 1.9, CHCl<sub>3</sub>)  
**Purity (SFC):** **S-15a** – 97%; **R-15b** – 98%

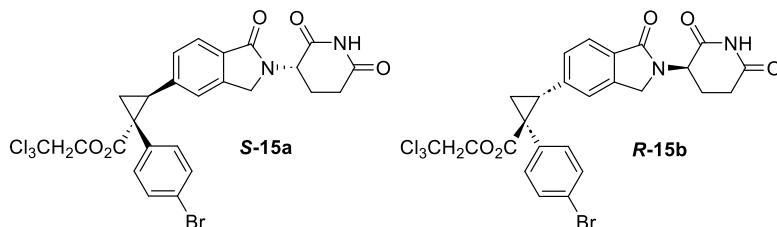

**2,2,2-trichloroethyl (1R,2S)-1-(4-bromophenyl)-2-(2-((S)-2,6-dioxopiperidin-3-yl)-1-oxoisindolin-5-yl)cyclopropane-1-carboxylate (S-15a).**

**2,2,2-trichloroethyl (1S,2R)-1-(4-bromophenyl)-2-(2-((R)-2,6-dioxopiperidin-3-yl)-1-oxoisindolin-5-yl)cyclopropane-1-carboxylate (R-15b).**

Compound **R-15a** was prepared following **GP 1**, using Rh<sub>2</sub>(*S*-p-Ph-TPCP)<sub>4</sub> (3.5 mg, 1 mol%, 2.0 μmol), (*R*)-3-(1-oxo-5-vinylisindolin-2-yl)piperidine-2,6-dione (54 mg, 1.0 equiv, 0.20 mmol), 2,2,2-trichloroethyl 2-(4-bromophenyl)-2-diazoacetate (82 mg, 1.1 equiv, 0.22 mmol), and CH<sub>2</sub>Cl<sub>2</sub> (2 mL) at room temperature for two hours. Purification via flash column chromatography (SiO<sub>2</sub>, gradient of 25% to 75% EtOAc in hexanes) afforded 2,2,2-trichloroethyl (1*R*,2*S*)-1-(4-bromophenyl)-2-(2-((*S*)-2,6-dioxopiperidin-3-yl)-1-oxoisindolin-5-yl)cyclopropane-1-carboxylate as an amorphous white solid. (118 mg, 0.19 mmol, 96% yield).

Compound **S-15b** was prepared in the same manner using (*S*)-3-(1-oxo-5-vinylisindolin-2-yl)piperidine-2,6-dione and Rh<sub>2</sub>(*R*-p-Ph-TPCP)<sub>4</sub>, which afforded 2,2,2-trichloroethyl (1*S*,2*R*)-1-(4-bromophenyl)-2-(2-((*S*)-2,6-dioxopiperidin-3-yl)-1-oxoisindolin-5-yl)cyclopropane-1-carboxylate as an amorphous white solid. (117 mg, 0.19 mmol, 95% yield).

**<sup>1</sup>H NMR (400 MHz, CDCl<sub>3</sub>)** δ 7.97 (s, 1H), 7.63 (d, *J* = 7.9 Hz, 1H), 7.29 (d, *J* = 8.5 Hz, 2H), 6.98 – 6.93 (m, 3H), 6.86 (s, 1H), 5.19 (dd, *J* = 13.2, 5.3 Hz, 1H), 4.83 (d, *J* = 11.9 Hz, 1H), 4.66 (d, *J* = 11.9 Hz, 1H), 4.36 (d, *J* = 16.0 Hz, 1H), 4.12 (d, *J* = 16.1 Hz, 1H), 3.30 (dd, *J* = 9.3, 7.4 Hz, 1H), 2.97-2.87, (m, 1H), 2.87-2.72 (m, 1H), 2.41 – 2.27 (m, 2H), 2.27 – 2.15 (m, 1H), 2.08 – 1.94 (m, 1H).

**<sup>13</sup>C NMR (101 MHz, CDCl<sub>3</sub>)** δ 171.5, 171.3, 169.8, 169.0, 141.5, 140.4, 133.6, 132.4, 131.3, 130.2, 128.6, 123.7, 122.4, 121.9, 94.9, 74.6, 51.8, 46.8, 37.4, 33.8, 31.6, 23.5, 20.8.

**SFC analysis:** **R-15a** (Chiralcel® OJ-3, 30% 1:1 MeOH:PrOH with 0.2% formic acid in CO<sub>2</sub>, 2.5 mL/min, diode array) indicated 99:1 d.r.: *t<sub>R</sub>* (major diastereomers) = 2.53 min (peak representing minor enantiomer of **R-15a** n.d.), *t<sub>R</sub>* (minor diastereomers) = 3.71 and 3.98 min. **S-15b** indicated the opposite diastereomers in 98:2 d.r.

**Specific rotation:** **R-15a**  $[\alpha]_D^{22}$  -4.8 (c 1, CHCl<sub>3</sub>) **S-15b**  $[\alpha]_D^{22}$  5.5 (c 1.9, CHCl<sub>3</sub>)

**Purity (SFC):** **R-15a** – 96%; **S-15b** – 97%

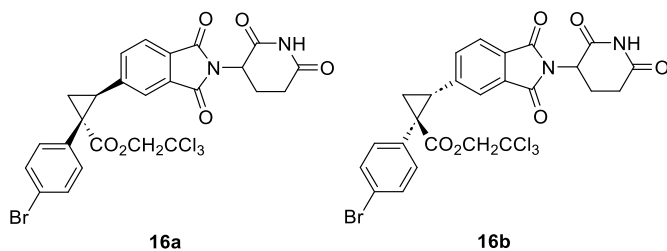

**2,2,2-trichloroethyl (1R,2S)-1-(4-bromophenyl)-2-(2-(2,6-dioxopiperidin-3-yl)-1,3-dioxoisindolin-5-yl)cyclopropane-1-carboxylate (16a).**

**2,2,2-trichloroethyl (1S,2R)-1-(4-bromophenyl)-2-(2-(2,6-dioxopiperidin-3-yl)-1,3-dioxoisindolin-5-yl)cyclopropane-1-carboxylate (16b).**

Compound **16a** was prepared following **GP 1**, using Rh<sub>2</sub>(*S*-p-Ph-TPCP)<sub>4</sub> (3.5 mg, 1 mol%, 2.0 μmol), 2-(2,6-dioxopiperidin-3-yl)-5-vinylisindoline-1,3-dione (57 mg, 1.0 equiv, 0.20 mmol), 2,2,2-trichloroethyl 2-(4-bromophenyl)-2-diazoacetate (82 mg, 1.1 equiv, 0.22 mmol), and CH<sub>2</sub>Cl<sub>2</sub> (2 mL) at room temperature for two

hours. Purification via flash column chromatography (SiO<sub>2</sub>, gradient of 20% to 60% EtOAc in hexanes) afforded 2,2,2-trichloroethyl (1*R*,2*S*)-1-(4-bromophenyl)-2-(2-(2,6-dioxopiperidin-3-yl)-1,3-dioxoisindolin-5-yl)cyclopropane-1-carboxylate as an amorphous white solid. (90 mg, 0.14 mmol, 72% yield). Compound **16b** was prepared in the same manner using Rh<sub>2</sub>(*R*-*p*-Ph-TPCP)<sub>4</sub>, which afforded 2,2,2-trichloroethyl (1*S*,2*R*)-1-(4-bromophenyl)-2-(2-(2,6-dioxopiperidin-3-yl)-1,3-dioxoisindolin-5-yl)cyclopropane-1-carboxylate as an amorphous white solid. (90 mg, 0.14 mmol, 72% yield).

**HRMS (APCI):** *m/z* 626.9492 [(M+H)<sup>+</sup> requires 625.9487], calc'd for C<sub>25</sub>H<sub>18</sub><sup>79</sup>Br<sup>35</sup>Cl<sub>3</sub>N<sub>2</sub>O<sub>6</sub>

**<sup>1</sup>H NMR** (500 MHz, CDCl<sub>3</sub>, reported as a mixture of diastereomers) δ 8.49 (s, 1H), 7.59 and 7.58 (d, *J*=2.0 Hz, 1H), 7.40 (d, 10.2 Hz, 1H), 7.29 (d, 8.0 Hz, 2H), 7.12-7.10 (m, 1H), 6.95 (d, *J*=8.0 Hz, 2H), 4.93 (dd, *J*=12.2, 5.3 Hz, 1H), 4.83 (d, 12.0 Hz, 1H), 4.65 (d, 12.0 Hz, 1H), 3.37-3.33 (m, 1H), 2.88-2.71 (m, 3H), 2.37 (dd, 9.2, 5.5 Hz, 1H), 2.13-2.08 (m, 2H).

**<sup>13</sup>C{<sup>1</sup>H} NMR** (126 MHz, CDCl<sub>3</sub>, reported as a mixture of diastereomers) δ 171.2, 170.9, 168.2, 167.04, 167.02, 166.90, 166.88, 143.72, 143.70, 133.91, 133.88, 133.47, 133.46, 131.9, 131.8, 131.6, 130.1, 129.1, 128.3, 125.4, 123.4, 123.47, 123.44, 122.3, 94.8, 74.7, 49.42, 49.39, 37.76, 37.74, 33.4, 31.42, 31.40, 22.69, 22.64, 20.68, 20.64.

**SFC analysis:** **16a** (Trefoil® CEL1, 20% 1:1 MeOH:PrOH with 0.2% formic acid in CO<sub>2</sub>, 2.5 mL/min, diode array) indicated 99:1 d.r.: *t<sub>R</sub>* (major diastereomers) = 5.17 and 5.62 min, *t<sub>R</sub>* (minor diastereomers) = 4.31 and 4.92 min. **16b** indicated the opposite diastereomers in 98:2 d.r.

**Purity (SFC):** **16a** – 98%; **16b** – 96%

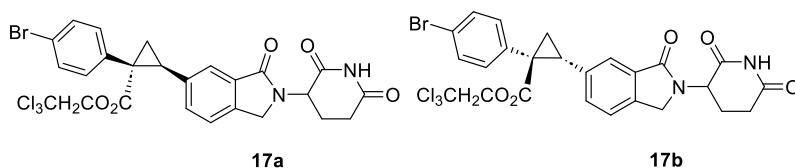

**2,2,2-trichloroethyl (1*R*,2*S*)-1-(4-bromophenyl)-2-(2-(2,6-dioxopiperidin-3-yl)-3-oxoisindolin-5-yl)cyclopropane-1-carboxylate (**17a**).**

**2,2,2-trichloroethyl (1*S*,2*R*)-1-(4-bromophenyl)-2-(2-(2,6-dioxopiperidin-3-yl)-3-oxoisindolin-5-yl)cyclopropane-1-carboxylate (**17b**).**

Compound **17a** was prepared following **GP 1** using Rh<sub>2</sub>(*S*-*p*-Ph-TPCP)<sub>4</sub> (3.5 mg, 1 mol%, 2.0 μmol), 3-(1-oxo-6-vinylisindolin-2-yl)piperidine-2,6-dione (54 mg, 1.0 equiv, 0.20 mmol), 2,2,2-trichloroethyl 2-(4-bromophenyl)-2-diazoacetate (82 mg, 1.1 equiv, 0.22 mmol), and CH<sub>2</sub>Cl<sub>2</sub> (2 mL) at room temperature for two hours. Purification via flash column chromatography (SiO<sub>2</sub>, gradient of 20% to 75% EtOAc in hexanes) afforded 2,2,2-trichloroethyl (1*R*,2*S*)-1-(4-bromophenyl)-2-(2-(2,6-dioxopiperidin-3-yl)-3-oxoisindolin-5-yl)cyclopropane-1-carboxylate as an amorphous white solid. (96 mg, 0.16 mmol, 78% yield).

Compound **17b** was prepared in the same manner using Rh<sub>2</sub>(*R*-*p*-Ph-TPCP)<sub>4</sub>, which afforded 2,2,2-trichloroethyl (1*S*,2*R*)-1-(4-bromophenyl)-2-(2-(2,6-dioxopiperidin-3-yl)-3-oxoisindolin-5-yl)cyclopropane-1-carboxylate as an amorphous white solid. (95 mg, 0.15 mmol, 77% yield).

**HRMS (APCI):** *m/z* 612.9698 [(M+H)<sup>+</sup> requires 612.9694], calc'd for C<sub>25</sub>H<sub>21</sub>O<sub>5</sub>N<sub>2</sub><sup>79</sup>Br<sup>35</sup>Cl<sub>3</sub>

**<sup>1</sup>H NMR** (600 MHz, CDCl<sub>3</sub>, reported as a mixture of diastereomers) δ 7.94 (s, 1H), 7.53 and 7.43 (s, 1H), 7.26 (d, *J* = 8.6 Hz, 2H, partially obscured by solvent signal), 7.21 and 7.19 (d, *J* = 7.9 Hz, 1H), 7.02 and 6.92 (dd, *J* = 8.0, 1.7 Hz, 1H), 6.96 (d, *J* = 8.6 Hz, 2H), 5.20 and 5.17 (dd, *J* = 15.6, 5.0 Hz, 1H), 4.843 and 4.841 (d, *J* = 12.0 Hz, 1H), 4.65 and 4.648 (d, *J* = 11.9 Hz, 1H), 4.41 and 4.39 (d, *J* = 16.0 Hz, 1H), 4.25 and 4.24 (d, *J* = 15.9 Hz, 0H), 3.34 (t, *J* = 8.3 Hz, 1H), 2.97 – 2.88 (m, 1H), 2.86 – 2.77 (m, 1H), 2.45 – 2.26 (m, 2H), 2.24-2.18 (m, 1H), 2.10 – 1.97 (m, 1H).

**<sup>13</sup>C{<sup>1</sup>H} NMR** (101 MHz, CDCl<sub>3</sub>, reported as a mixture of diastereomers) δ 171.4, 171.3, 169.72, 169.69, 169.1, 140.20, 140.18, 136.23, 136.21, 133.7, 133.6, 132.5, 132.2, 131.62, 131.58, 131.28, 131.26, 124.4, 123.7, 122.7, 121.9, 121.8, 95.0, 74.6, 51.98, 51.85, 47.0, 46.8, 36.94, 36.87, 33.57, 31.64, 31.62, 23.5, 20.1, 20.0.

**SFC analysis:** **17a** (Trefoil® CEL1, 25% 1:1 EtOH:PrOH with 0.2% formic acid in CO<sub>2</sub>, 2.0 mL/min, diode array) indicated 98:2 d.r.: *t<sub>R</sub>* (major diastereomers) = 4.85 and 5.60 min, *t<sub>R</sub>* (minor diastereomers) = 4.34 and 4.72min. **17b** indicated the opposite diastereomers in 97:3 d.r.

**Purity (SFC): 17a – 99%; 17b – 95%**

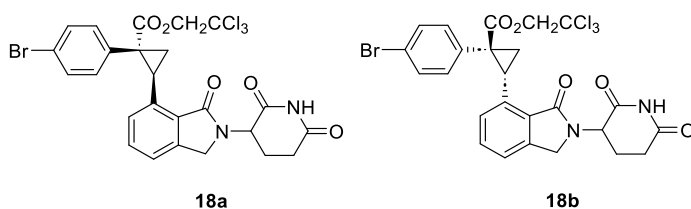

**2,2,2-trichloroethyl (1R,2S)-1-(4-bromophenyl)-2-(2-(2,6-dioxopiperidin-3-yl)-3-oxoisindolin-4-yl)cyclopropane-1-carboxylate (18a).**

**2,2,2-trichloroethyl (1S,2R)-1-(4-bromophenyl)-2-(2-(2,6-dioxopiperidin-3-yl)-3-oxoisindolin-4-yl)cyclopropane-1-carboxylate (18b).**

Compound **18a** was prepared following **GP 1**, using  $\text{Rh}_2(\text{S-p-Ph-TPCP})_4$  (3.5 mg, 1 mol%, 2.0  $\mu\text{mol}$ ), 3-(1-oxo-7-vinylisindolin-2-yl)piperidine-2,6-dione (54 mg, 1.0 equiv, 0.20 mmol), 2,2,2-trichloroethyl 2-(4-bromophenyl)-2-diazoacetate (82 mg, 1.1 equiv, 0.22 mmol), and  $\text{CH}_2\text{Cl}_2$  (2 mL) at room temperature for two hours. Purification via flash column chromatography ( $\text{SiO}_2$ , gradient of 50% to 60% EtOAc in hexanes) afforded 2,2,2-trichloroethyl (1R,2S)-1-(4-bromophenyl)-2-(2-(2,6-dioxopiperidin-3-yl)-3-oxoisindolin-4-yl)cyclopropane-1-carboxylate as an amorphous white solid. (35 mg, 56  $\mu\text{mol}$ , 28% yield).

Compound **18b** was prepared in the same manner using  $\text{Rh}_2(\text{R-p-Ph-TPCP})_4$ , which afforded 2,2,2-trichloroethyl (1S,2R)-1-(4-bromophenyl)-2-(2-(2,6-dioxopiperidin-3-yl)-3-oxoisindolin-4-yl)cyclopropane-1-carboxylate as an amorphous white solid. (36 mg, 57  $\mu\text{mol}$ , 29% yield).

**HRMS (APCI):**  $m/z$  612.9698 [ $\text{M}+\text{H}$ ]<sup>+</sup> requires 612.9694], calc'd for  $\text{C}_{25}\text{H}_{21}\text{O}_5\text{N}_2^{79}\text{Br}^{35}\text{Cl}_3$

**<sup>1</sup>H NMR** (400 MHz,  $\text{CDCl}_3$ , reported as a mixture of diastereomers)  $\delta$  8.30 and 8.23 (s, 1H), 7.24 – 7.14 (m, 4H), 7.00 and 6.97 (d,  $J = 8.5$  Hz, 2H), 6.60-6.52 and 6.52-6.45 (m, 1H), 5.27 and 5.19 (dd,  $J = 13.3, 5.1$  Hz, 1H), 4.91 and 4.89, (d,  $J = 11.9$  Hz, 1H), 4.67 and 4.65 (d,  $J = 11.9$  Hz, 1H), 4.47-4.22 (m, 3H), 3.00 – 2.75 (m, 2H), 2.50 – 2.18 (m, 3H), 2.15-2.10 (m, 1H).

**<sup>13</sup>C{<sup>1</sup>H} NMR** (101 MHz,  $\text{CDCl}_3$ , reported as a mixture of diastereomers)  $\delta$  171.5 and 171.4, 171.34 and 171.30, 170.0 and 169.73, 169.72 and 169.61, 142.14 and 142.12, 135.47 and 135.45, 133.45 and 133.28, 133.42 and 133.38, 131.6 and 131.5, 131.0 and 130.9, 130.1 and 129.9, 126.1 and 126.0, 121.7 and 121.6, 121.49, 121.46, 95.1, 74.8 and 74.7, 52.1 and 51.9, 46.9 and 46.6, 36.8 and 36.5, 31.8 and 31.7, 29.6 and 29.3, 23.6 and 23.4, 19.2 and 19.0.

**SFC analysis:** **18a** (Trefoil® AMY1, 30% 1:1 MeOH:<sup>t</sup>PrOH with 0.2% formic acid in  $\text{CO}_2$ , 2.5 mL/min, diode array) indicated 99:1 d.r.:  $t_R$  (major diastereomers) = 3.65 and 5.13 min,  $t_R$  (minor diastereomers) = 3.17 and 4.24 min. **18b** indicated the opposite diastereomers in 99:1 d.r.

**Purity (SFC): 18a – 98%; 18b – 99%**

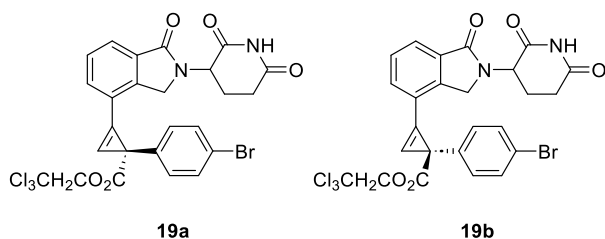

**2,2,2-trichloroethyl (1S)-1-(4-bromophenyl)-2-(2-(2,6-dioxopiperidin-3-yl)-1-oxoisindolin-4-yl)cycloprop-2-ene-1-carboxylate (19a).**

**2,2,2-trichloroethyl (1R)-1-(4-bromophenyl)-2-(2-(2,6-dioxopiperidin-3-yl)-1-oxoisindolin-4-yl)cycloprop-2-ene-1-carboxylate (19b).**

Compound **19a** was prepared following **GP 2**, using  $\text{Rh}_2(\text{S-p-Ph-TPCP})_4$  (3.5 mg, 1 mol%, 2.0  $\mu\text{mol}$ ), 3-(4-ethynyl-1-oxoisindolin-2-yl)piperidine-2,6-dione (54 mg, 1.0 equiv, 0.20 mmol), 2,2,2-trichloroethyl 2-(4-bromophenyl)-2-diazoacetate (82 mg, 1.1 equiv, 0.22 mmol), and  $\text{CH}_2\text{Cl}_2$  (2 mL) at room temperature for two hours. Purification via flash column chromatography ( $\text{SiO}_2$ , gradient of 30% to 90% EtOAc in hexanes)

afforded 2,2,2-trichloroethyl (1*S*)-1-(4-bromophenyl)-2-(2-(2,6-dioxopiperidin-3-yl)-1-oxoisindolin-4-yl)cycloprop-2-ene-1-carboxylate as an amorphous white solid. (76 mg, 0.12 mmol, 62% yield).

Compound **19b** was prepared in the same manner using Rh<sub>2</sub>(*R*-p-Ph-TPCP)<sub>4</sub>, which afforded 2,2,2-trichloroethyl (1*R*)-1-(4-bromophenyl)-2-(2-(2,6-dioxopiperidin-3-yl)-1-oxoisindolin-4-yl)cycloprop-2-ene-1-carboxylate as an amorphous white solid. (79 mg, 0.13 mmol, 64% yield).

**HRMS (APCI):** *m/z* 610.9536 [(M+H)<sup>+</sup> requires 610.9537], calc'd for C<sub>25</sub>H<sub>19</sub>O<sub>5</sub>N<sub>2</sub><sup>79</sup>Br<sup>35</sup>Cl<sub>3</sub>

**<sup>1</sup>H NMR** (600 MHz, CDCl<sub>3</sub>, reported as a mixture of diastereomers) δ 8.27 (s, 1H), 7.96 (d, *J* = 7.6 Hz, 1H), 7.74 (t, *J* = 7.5 Hz, 1H), 7.58 (td, *J* = 7.6, 2.7 Hz, 1H), 7.444 and 7.437 (d, *J* = 8.5 Hz, 2H), 7.39 and 7.38 (s, 1H), 7.29 and 7.28 (d, *J* = 8.5 Hz, 2H), 5.25 and 5.22 (dd, *J* = 13.4, 5.2 Hz, 1H), 4.81 and 4.80 (d, *J* = 12 Hz, 1H), 4.762 and 4.760 (d, *J* = 12 Hz, 1H), 4.60 and 4.58 (d, *J* = 15.7 Hz, 1H), 4.43 and 4.40 (d, 16.5 Hz, 1H), 2.95-2.89 (m, 1H), 2.88-2.81 (m, 1H), 2.40-2.30 (m, 1H), 2.26 – 2.18 (m, 1H).

**<sup>13</sup>C{<sup>1</sup>H} NMR** (101 MHz, CDCl<sub>3</sub>, reported as a mixture of diastereomers) δ 171.92, 171.90, 171.0, 169.5, 169.4, 168.60, 168.58, 142.41, 142.40, 138.6, 138.5, 133.02, 133.97, 132.60, 132.57, 131.6, 129.9, 129.32, 126.29, 121.3, 120.32, 120.29, 113.7, 113.3, 102.41, 102.37, 95.0, 74.5, 74.4, 52.1, 52.0, 46.8, 46.7, 32.5, 32.4, 31.6, 23.6.

**SFC analysis:** **19a** (Trefoil® AMY1, 30% 1:1 MeOH:<sup>t</sup>PrOH with 0.2% formic acid in CO<sub>2</sub>, 2.5 mL/min, diode array) indicated 98:2 d.r.: *t*<sub>R</sub> (major diastereomers) = 3.00 and 3.55 min, *t*<sub>R</sub> (minor diastereomers) = 4.41 and 5.81 min. **19b** indicated the opposite diastereomers in 98:2 d.r.

**Purity (SFC):** **19a** – 98%; **19b** – 95%

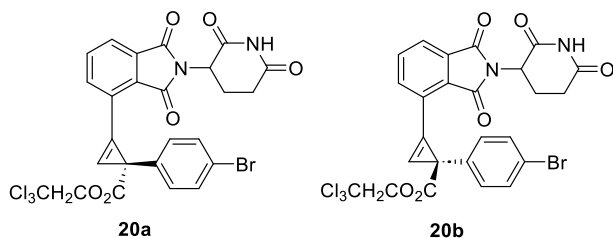

**2,2,2-trichloroethyl (1*S*)-1-(4-bromophenyl)-2-(2-(2,6-dioxopiperidin-3-yl)-1,3-dioxoisindolin-4-yl)cycloprop-2-ene-1-carboxylate (20a).**

**2,2,2-trichloroethyl (1*R*)-1-(4-bromophenyl)-2-(2-(2,6-dioxopiperidin-3-yl)-1,3-dioxoisindolin-4-yl)cycloprop-2-ene-1-carboxylate (20b).**

Compound **20a** was prepared following GP 2, using Rh<sub>2</sub>(*S*-p-Ph-TPCP)<sub>4</sub> (3.5 mg, 1 mol%, 2.0 μmol), 2-(2,6-dioxopiperidin-3-yl)-4-ethynylisindoline-1,3-dione (56 mg, 1.0 equiv, 0.20 mmol), 2,2,2-trichloroethyl 2-(4-bromophenyl)-2-diazoacetate (82 mg, 1.1 equiv, 0.22 mmol), and CH<sub>2</sub>Cl<sub>2</sub> (2 mL) at room temperature for two hours. Purification via flash column chromatography (SiO<sub>2</sub>, gradient of 30% to 55% EtOAc in hexanes) afforded 2,2,2-trichloroethyl (1*S*)-1-(4-bromophenyl)-2-(2-(2,6-dioxopiperidin-3-yl)-1,3-dioxoisindolin-4-yl)cycloprop-2-ene-1-carboxylate as an amorphous white solid. (93 mg, 0.15 mmol, 76% yield).

Compound **20b** was prepared in the same manner using Rh<sub>2</sub>(*R*-p-Ph-TPCP)<sub>4</sub>, which afforded 2,2,2-trichloroethyl (1*R*)-1-(4-bromophenyl)-2-(2-(2,6-dioxopiperidin-3-yl)-1,3-dioxoisindolin-4-yl)cycloprop-2-ene-1-carboxylate as an amorphous white solid. (99 mg, 0.16 mmol, 79% yield).

**HRMS (APCI):** *m/z* 624.9330 [(M+H)<sup>+</sup> requires 624.9330 ], calc'd for C<sub>25</sub>H<sub>17</sub>O<sub>6</sub>N<sub>2</sub><sup>79</sup>Br<sup>35</sup>Cl<sub>3</sub>

**<sup>1</sup>H NMR** (600 MHz, CDCl<sub>3</sub>, reported as a mixture of diastereomers) δ 8.29 (s, 1H), 7.95 (d, *J* = 7.7 Hz, 1H), 7.74 (t, *J* = 7.6 Hz, 1H), 7.584 and 7.58 (t, *J* = 7.7 Hz, 1H), 7.443 and 7.436 (d, *J* = 8.6 Hz, 2H), 7.39 and 7.38 (s, 1H), 7.29 and 7.28 (d, *J* = 8.6 Hz, 2H), 5.26 and 5.22 (dd, *J* = 13.4, 5.0 Hz, 1H), 4.81 and 4.79 (d, *J* = 12.0 Hz, 1H), 4.761 and 4.760 (d, *J* = 11.9 Hz, 1H), 4.61 and 4.56 (d, *J* = 16.6 Hz, 1H), 4.43 and 4.40 (d, *J* = 16.5 Hz, 1H), 2.97-2.87 (m, 1H), 2.87-2.79 (m, 1H), 2.41-2.29 (m, 1H), 2.27 – 2.11 (m, 1H).

**<sup>13</sup>C{<sup>1</sup>H} NMR** (101 MHz, CDCl<sub>3</sub>, reported as a mixture of diastereomers) δ 171.8, 170.9, 168.0, 166.59, 166.57, 166.24, 166.22, 138.3, 138.2, 135.8, 135.7, 134.9, 133.1, 131.5, 130.1, 129.91, 129.86, 125.2, 122.70, 122.68, 121.2, 112.48, 112.45, 108.11, 108.06, 95.11, 95.08, 74.49, 74.47, 49.6, 33.92, 33.91, 31.5, 22.7.

**SFC analysis:** **20a** (Chiralcel® OX-3, 30% 1:1 MeOH:<sup>t</sup>PrOH with 0.2% formic acid in CO<sub>2</sub>, 2.5 mL/min, diode array) indicated 80:20 d.r.: *t*<sub>R</sub> (major diastereomers) = 6.92 and 12.88 min, *t*<sub>R</sub> (minor diastereomers) = 4.57 and 4.97 min. **20b** indicated the opposite diastereomers in 81:19 d.r.

Purity (SFC): **20a** – 99%; **20b** – 98%

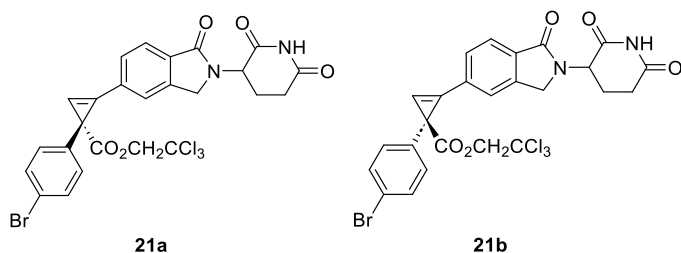

**2,2,2-trichloroethyl (1S)-1-(4-bromophenyl)-2-(2-(2,6-dioxopiperidin-3-yl)-1-oxoisindolin-5-yl)cycloprop-2-ene-1-carboxylate (21a).**

**2,2,2-trichloroethyl (1R)-1-(4-bromophenyl)-2-(2-(2,6-dioxopiperidin-3-yl)-1-oxoisindolin-5-yl)cycloprop-2-ene-1-carboxylate (21b).**

Compound **21a** was prepared following **GP 2**, using  $\text{Rh}_2(\text{S-p-Ph-TPCP})_4$  (3.5 mg, 1 mol%, 2.0  $\mu\text{mol}$ ), 3-(5-ethynyl-1-oxoisindolin-2-yl)piperidine-2,6-dione (54 mg, 1.0 equiv, 0.20 mmol), 2,2,2-trichloroethyl 2-(4-bromophenyl)-2-diazoacetate (82 mg, 1.1 equiv, 0.22 mmol), and  $\text{CH}_2\text{Cl}_2$  (2 mL) at room temperature for two hours. Purification via flash column chromatography ( $\text{SiO}_2$ , gradient of 35% to 55% EtOAc in hexanes) afforded 2,2,2-trichloroethyl (S)-1-(4-bromophenyl)-2-(2-(2,6-dioxopiperidin-3-yl)-1-oxoisindolin-5-yl)cycloprop-2-ene-1-carboxylate as an amorphous white solid. (48 mg, 78  $\mu\text{mol}$ , 39% yield).

Compound **21b** was prepared in the same manner using  $\text{Rh}_2(\text{R-p-Ph-TPCP})_4$ , which afforded 2,2,2-trichloroethyl (R)-1-(4-bromophenyl)-2-(2-(2,6-dioxopiperidin-3-yl)-1-oxoisindolin-5-yl)cycloprop-2-ene-1-carboxylate as an amorphous white solid. (46 mg, 74  $\mu\text{mol}$ , 37% yield).

**HRMS (APCI):**  $m/z$  610.9536 [(M+H)<sup>+</sup> requires 610.9537], calc'd for  $\text{C}_{25}\text{H}_{19}\text{O}_5\text{N}_2^+\text{Br}^-\text{Cl}_3$

**<sup>1</sup>H NMR** (400 MHz,  $\text{CDCl}_3$ , reported as a mixture of diastereomers)  $\delta$  8.27 (s, 1H), 7.952 and 7.950 (d,  $J$  = 7.9 Hz, 1H), 7.79 – 7.71 (m, 1H), 7.69 – 7.64 (m, 1H), 7.43 (d,  $J$  = 8.5 Hz, 2H), 7.39 (s, 1H), 7.29 (d,  $J$  = 8.6 Hz, 2H), 5.23 (dd,  $J$  = 13.3, 5.2 Hz, 1H), 4.823 and 4.816 (d,  $J$  = 12.0 Hz, 1H), 4.764 and 4.760 (d,  $J$  = 12.0 Hz, 1H), 4.52 and 4.51 (d,  $J$  = 16.3 Hz, 1H), 4.37 and 4.35 (d,  $J$  = 16.3 Hz, 1H), 2.98 – 2.88 (m, 2H), 2.88 – 2.76 (m, 1H), 2.35 (qd,  $J$  = 13.1, 5.1 Hz, 1H), 2.26 – 2.15 (m, 1H).

**<sup>13</sup>C{<sup>1</sup>H} NMR** (101 MHz,  $\text{CDCl}_3$ , reported as a mixture of diastereomers)  $\delta$  <sup>13</sup>C NMR (101 MHz,  $\text{CDCl}_3$ )  $\delta$  172.08, 172.06, 171.1, 169.5, 168.5, 142.1, 138.5, 133.17, 133.15, 131.50, 131.48, 130.32, 130.30, 129.95, 128.4, 125.0, 124.5, 121.13, 121.10, 116.2, 102.2, 102.1, 95.1, 74.42, 74.39, 52.1, 47.1, 33.3, 31.6, 23.5.

**SFC analysis:** **21a** (Chiralpak® AS3, 20% 1:1:1 EtOH:PrOH:MeCN with 20 mM  $\text{NH}_4\text{HCO}_2$  in  $\text{CO}_2$ , 2.5 mL/min, diode array) indicated >99:1 d.r.:  $t_R$  (major diastereomers) = 3.94 and 6.41 min,  $t_R$  (minor diastereomers) = 3.41 and 4.88 min. **21b** indicated the opposite diastereomers in 99:1 d.r.

Purity (SFC): **21a** – 97%; **21b** – 95%

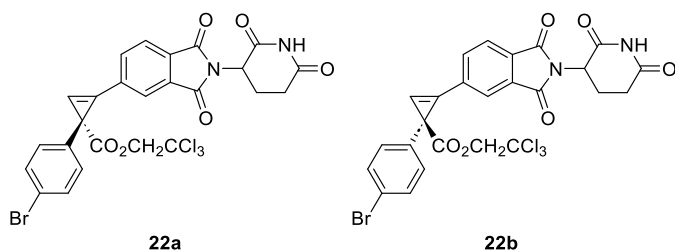

**2,2,2-trichloroethyl (1S)-1-(4-bromophenyl)-2-(2-(2,6-dioxopiperidin-3-yl)-1,3-dioxoisindolin-5-yl)cycloprop-2-ene-1-carboxylate (22a).**

**2,2,2-trichloroethyl (1R)-1-(4-bromophenyl)-2-(2-(2,6-dioxopiperidin-3-yl)-1,3-dioxoisindolin-5-yl)cycloprop-2-ene-1-carboxylate (22b).**

Compound **22a** was prepared following **GP 2**, using  $\text{Rh}_2(\text{S-p-Ph-TPCP})_4$  (3.5 mg, 1 mol%, 2.0  $\mu\text{mol}$ ), 2-(2,6-dioxopiperidin-3-yl)-5-ethynylisindoline-1,3-dione (56 mg, 1.0 equiv, 0.20 mmol), 2,2,2-trichloroethyl 2-(4-bromophenyl)-2-diazoacetate (82 mg, 1.1 equiv, 0.22 mmol), and  $\text{CH}_2\text{Cl}_2$  (2 mL) at room temperature for two

hours. Purification via flash column chromatography (SiO<sub>2</sub>, gradient of 20% to 50% EtOAc in hexanes) afforded 2,2,2-trichloroethyl (1*S*)-1-(4-bromophenyl)-2-(2-(2,6-dioxopiperidin-3-yl)-1,3-dioxoisindolin-5-yl)cycloprop-2-ene-1-carboxylate as an amorphous white solid. (87 mg, 0.14 mmol, 69% yield). Compound **22b** was prepared in the same manner using Rh<sub>2</sub>(*R*-p-Ph-TPCP)<sub>4</sub>, which afforded 2,2,2-trichloroethyl (1*R*)-1-(4-bromophenyl)-2-(2-(2,6-dioxopiperidin-3-yl)-1,3-dioxoisindolin-5-yl)cycloprop-2-ene-1-carboxylate as an amorphous white solid. (88 mg, 0.14 mmol, 70% yield).

**HRMS (APCI):** *m/z* 624.9341 [(M+H)<sup>+</sup> requires 624.9344], calc'd for C<sub>25</sub>H<sub>16</sub><sup>79</sup>Br<sub>3</sub>Cl<sub>3</sub>N<sub>2</sub>O<sub>6</sub>

<sup>1</sup>H NMR (500 MHz, CDCl<sub>3</sub>, reported as a mixture of diastereomers) δ 8.26 (s, 1H), 8.11-8.10 (m, 1H), 7.98-7.94 (m, 2H), 7.54 (s, 1H), 7.45 (d, *J*=8.5 Hz, 2H), 7.28 (d, *J*=8.5 Hz, 2H), 5.01 (dd, *J*=12.5, 5.1 Hz, 1H), 4.84 and 4.83 (d, *J*=12.0 Hz, 1H), 4.76 (d, *J*=12.0 Hz, 1H), 2.94-2.72 (m, 3H), 2.19-2.14 (m, 1H).

<sup>13</sup>C{<sup>1</sup>H} NMR (126 MHz, CDCl<sub>3</sub>, reported as a mixture of diastereomers) δ 171.5, 171.0, 167.9, 166.5, 166.4, 137.9, 135.7, 132.7, 132.6, 131.6, 131.2, 129.90, 129.89, 124.89, 124.88, 124.6, 121.4, 116.1, 116.0, 104.5, 95.0, 74.5, 60.5, 49.7, 33.7, 31.48, 31.46, 22.7, 22.6, 14.3.

**SFC analysis:** **22a** (Chiralcel® OJ-3, 20% 1:1 MeOH:<sup>i</sup>PrOH with 0.2% formic acid in CO<sub>2</sub>, 2.5 mL/min, diode array) indicated 98:2 d.r.: *t*<sub>R</sub> (major diastereomers) = 7.10 and 8.24 min, *t*<sub>R</sub> (minor diastereomers) = 9.20 and 11.52 min. **22b** indicated the opposite diastereomers in 99:1 d.r.

**Purity (SFC):** **22a** – 98%; **22b** – 95%

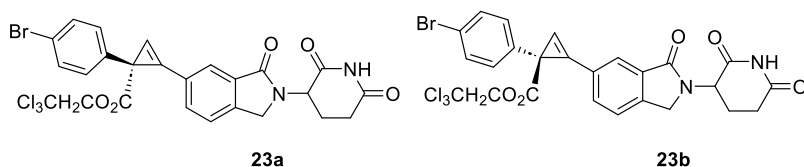

**2,2,2-trichloroethyl (1*S*)-1-(4-bromophenyl)-2-(2-(2,6-dioxopiperidin-3-yl)-3-oxoisindolin-5-yl)cycloprop-2-ene-1-carboxylate (**23a**).**

**2,2,2-trichloroethyl (1*R*)-1-(4-bromophenyl)-2-(2-(2,6-dioxopiperidin-3-yl)-3-oxoisindolin-5-yl)cycloprop-2-ene-1-carboxylate (**23b**).**

Compound **23a** was prepared following **GP 2**, using Rh<sub>2</sub>(*S*-p-Ph-TPCP)<sub>4</sub> (3.5 mg, 1 mol%, 2.0 μmol), 3-(6-ethynyl-1-oxoisindolin-2-yl)piperidine-2,6-dione (54 mg, 1.0 equiv, 0.20 mmol), 2,2,2-trichloroethyl 2-(4-bromophenyl)-2-diazoacetate (82 mg, 1.1 equiv, 0.22 mmol), and CH<sub>2</sub>Cl<sub>2</sub> (2 mL) at room temperature for two hours. Purification via flash column chromatography (SiO<sub>2</sub>, gradient of 60% to 75% EtOAc in hexanes) afforded 2,2,2-trichloroethyl (1*S*)-1-(4-bromophenyl)-2-(2-(2,6-dioxopiperidin-3-yl)-3-oxoisindolin-5-yl)cycloprop-2-ene-1-carboxylate as an amorphous white solid. (76 mg, 12 μmol, 62% yield).

Compound **23b** was prepared in the same manner using Rh<sub>2</sub>(*R*-p-Ph-TPCP)<sub>4</sub>, which afforded 2,2,2-trichloroethyl (1*R*)-1-(4-bromophenyl)-2-(2-(2,6-dioxopiperidin-3-yl)-3-oxoisindolin-5-yl)cycloprop-2-ene-1-carboxylate as an amorphous white solid. (77 mg, 0.13 mmol, 63% yield).

**HRMS (APCI):** *m/z* 610.9540 [(M+H)<sup>+</sup> requires 610.9537], calc'd for C<sub>25</sub>H<sub>19</sub>O<sub>5</sub>N<sub>2</sub><sup>79</sup>Br<sup>35</sup>Cl<sub>3</sub>

<sup>1</sup>H NMR (600 MHz, CDCl<sub>3</sub>, reported as a mixture of diastereomers) δ 8.17 (s, 1H), 8.13 (d, *J* = 6.2 Hz, 1H), 7.81 (t, *J* = 7.9 Hz, 1H), 7.54 (d, *J* = 7.9 Hz, 1H), 7.42 (d, *J* = 8.6 Hz, 2H), 7.32 (s, 1H), 7.31 (d, *J* = 8.4 Hz, 2H), 5.29 – 5.17 (m, 1H), 4.82 and 4.81 (d, *J* = 11.9 Hz, 1H), 4.76 and 4.75 Hz (d, *J* = 11.9 Hz, 1H), 4.54 (d, *J* = 16.7 Hz, 1H), 4.39 (d, *J* = 16.5 Hz, 1H), 2.97 – 2.90 (m, 1H), 2.88 – 2.77 (m, 1H), 2.41 – 2.30 (m, 1H), 2.25 – 2.18 (m, 1H).

<sup>13</sup>C{<sup>1</sup>H} NMR (101 MHz, CDCl<sub>3</sub>, reported as a mixture of diastereomers) δ 172.2, 169.5, 171.3, 168.5, 143.3, 138.6, 133.61, 133.57, 132.54, 132.52, 131.4, 130.1, 125.65, 125.61, 125.4, 123.9, 121.02, 121.00, 116.3, 116.2, 100.7, 95.1, 74.4, 52.03, 52.00, 47.3, 33.3, 31.6, 23.5.

**SFC analysis:** **23a** (Chiralcel® OJ-3, 30% 1:1 MeOH:<sup>i</sup>PrOH with 0.2% formic acid in CO<sub>2</sub>, 2.5 mL/min, diode array) indicated 98:2 d.r.: *t*<sub>R</sub> (major diastereomers) = 1.81 and 2.40 min, *t*<sub>R</sub> (minor diastereomers) = 2.12 and 3.16 min. **23b** indicated the opposite diastereomers in 98:2 d.r.

**Purity (SFC):** **23a** – 99%; **23b** – 99%

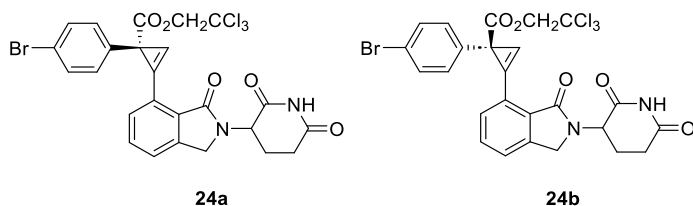

**2,2,2-trichloroethyl (1*S*)-1-(4-bromophenyl)-2-(2-(2,6-dioxopiperidin-3-yl)-3-oxoisindolin-4-yl)cycloprop-2-ene-1-carboxylate (24a).**

**2,2,2-trichloroethyl (1*R*)-1-(4-bromophenyl)-2-(2-(2,6-dioxopiperidin-3-yl)-3-oxoisindolin-4-yl)cycloprop-2-ene-1-carboxylate (24b).**

Compound **24a** was prepared following **GP 2**, using  $\text{Rh}_2(\text{S-p-Ph-TPCP})_4$  (3.5 mg, 1 mol%, 2.0  $\mu\text{mol}$ ), 3-(7-ethynyl-1-oxoisindolin-2-yl)piperidine-2,6-dione (54 mg, 1.0 equiv, 0.20 mmol), 2,2,2-trichloroethyl 2-(4-bromophenyl)-2-diazoacetate (82 mg, 1.1 equiv, 0.22 mmol), and  $\text{CH}_2\text{Cl}_2$  (2 mL) at room temperature for two hours. Purification via flash column chromatography ( $\text{SiO}_2$ , gradient of 45% to 70% EtOAc in hexanes) afforded 2,2,2-trichloroethyl (1*S*)-1-(4-bromophenyl)-2-(2-(2,6-dioxopiperidin-3-yl)-3-oxoisindolin-4-yl)cycloprop-2-ene-1-carboxylate as an amorphous white solid. (99 mg, 0.16 mmol, 81% yield).

Compound **24b** was prepared in the same manner using  $\text{Rh}_2(\text{R-p-Ph-TPCP})_4$ , which afforded 2,2,2-trichloroethyl (1*R*)-1-(4-bromophenyl)-2-(2-(2,6-dioxopiperidin-3-yl)-3-oxoisindolin-4-yl)cycloprop-2-ene-1-carboxylate as an amorphous white solid. (97 mg, 0.16 mmol, 79% yield).

**HRMS (APCI):**  $m/z$  610.9545 [( $\text{M}+\text{H}$ )<sup>+</sup> requires 610.9537], calc'd for  $\text{C}_{25}\text{H}_{19}\text{O}_5\text{N}_2^{79}\text{Br}^{35}\text{Cl}_3$

**<sup>1</sup>H NMR** (600 MHz,  $\text{CDCl}_3$ )  $\delta$  8.17 (s, 1H), 7.66 (d,  $J = 3.6$  Hz, 1H), 7.63 – 7.54 (m, 2H), 7.51 and 7.50 (s, 1H), 7.41 and 7.40 (d,  $J = 8.6$  Hz, 2H), 7.34 and 7.33 (d,  $J = 8.6$  Hz, 2H), 5.25 and 5.23 (dd,  $J = 13.0, 5.1$  Hz, 1H), 4.85 and 4.83 (d,  $J = 11.9$  Hz, 1H), 4.74 and 4.73 (d,  $J = 12.0$  Hz, 1H), 2.95–2.89 (m, 1H), 2.89–2.84 (m, 1H), 2.43–2.33 (m, 1H), 2.29–2.14 (m, 1H).

**<sup>13</sup>C{<sup>1</sup>H} NMR** (101 MHz,  $\text{CDCl}_3$ , reported as a mixture of diastereomers)  $\delta$  172.5, 172.4, 171.3, 169.7, 168.4, 143.1, 139.1, 139.0, 132.2, 131.29, 131.28, 130.45, 130.43, 130.37, 130.26, 130.24, 124.8, 122.5, 120.80, 120.77, 112.7, 112.5, 106.0, 105.9, 95.3, 74.4, 74.3, 52.1, 52.0, 47.1, 47.0, 33.27, 33.26, 31.7, 23.5.

**SFC analysis:** **24a** (Chiralpak® AS3, 20% 1:1 MeOH:PrOH with 0.2% formic acid in  $\text{CO}_2$ , 2.5 mL/min, diode array) indicated 61:39 d.r.:  $t_R$  (major diastereomers) = 4.05 and 5.21 min,  $t_R$  (minor diastereomers) = 4.49 and 7.67 min. **24b** indicated the opposite diastereomers in 60:40 d.r.

**Purity (SFC):** **24a** – 95%; **24b** – 95%

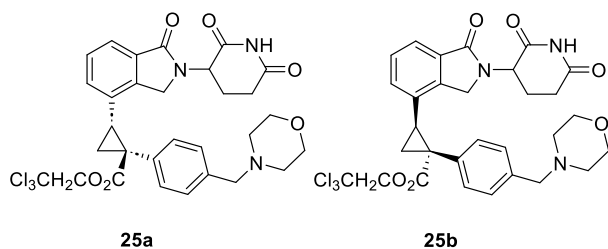

**2,2,2-trichloroethyl (1*S*,2*R*)-2-(2-(2,6-dioxopiperidin-3-yl)-1-oxoisindolin-4-yl)-1-(4-(morpholinomethyl)phenyl)cyclopropane-1-carboxylate (25a).**

**2,2,2-trichloroethyl (1*R*,2*S*)-2-(2-(2,6-dioxopiperidin-3-yl)-1-oxoisindolin-4-yl)-1-(4-(morpholinomethyl)phenyl)cyclopropane-1-carboxylate (25b).**

A 10 mL round-bottom flask was charged with a PTFE magnetic stir bar and ca. 200% w/w 4 Å molecular sieves, then flame dried under vacuum. The flask was then backfilled with dry nitrogen.  $\text{Rh}_2(\text{S-tetra-p-BrPPTTL})_4$  (3.7 mg, 1 mol%, 1.0  $\mu\text{mol}$ ) and 3-(1-oxo-4-vinylisindolin-2-yl)piperidine-2,6-dione (27 mg, 1.0 equiv, 0.10 mmol) were charged to the flask, and the flask was evacuated and backfilled with nitrogen. The flask was equipped with an argon balloon and rubber septum, and dry  $\text{CH}_2\text{Cl}_2$  (0.5 mL) along with 0.10 mL 1,1,1,3,3,3-hexafluoroisopropanol (10 equiv, 1.0 mmol) were charged via syringe. A solution of 2,2,2-trichloroethyl 2-diazo-2-(4-(morpholinomethyl)phenyl)acetate (43 mg, 1.1 equiv, 0.11 mmol) in dry  $\text{CH}_2\text{Cl}_2$  (0.5 mL, prepared in the same manner under inert atmosphere) was added dropwise to the stirred reaction at



room temperature. The reaction was allowed to stir for two hours, after which the reaction was filtered through Celite®, rinsing the filter pad with CH<sub>2</sub>Cl<sub>2</sub>. The crude residue was dry-mounted onto silica gel and was purified by flash column chromatography (SiO<sub>2</sub>, 0-5% methanol in CH<sub>2</sub>Cl<sub>2</sub>), which afforded 2,2,2-trichloroethyl (1*S*,2*R*)-2-(2-(2,6-dioxopiperidin-3-yl)-1-oxoisoindolin-4-yl)-1-(4-(morpholinomethyl)phenyl)cyclopropane-1-carboxylate as an amorphous white solid (50 mg, 79 μmol, 79% yield).

Compound **25b** was prepared in the same manner using Rh<sub>2</sub>(*R*-tetra-*p*-BrPPTTL)<sub>4</sub>, which afforded 2,2,2-trichloroethyl (1*R*,2*S*)-2-(2-(2,6-dioxopiperidin-3-yl)-1-oxoisoindolin-4-yl)-1-(4-(morpholinomethyl)phenyl)cyclopropane-1-carboxylate as an amorphous white solid as an amorphous white solid. (49 mg, 77 μmol, 77% yield).

**HRMS** (APCI): *m/z* 634.1279 ([*M*+*H*]<sup>+</sup> requires 634.1273), calc'd for C<sub>30</sub>H<sub>31</sub>O<sub>6</sub>N<sub>3</sub><sup>35</sup>Cl<sub>3</sub>

**<sup>1</sup>H NMR** (400 MHz, CDCl<sub>3</sub>, reported as a mixture of diastereomers) δ 8.54 (s, 1H), 7.595 and 7.593 (d, *J* = 7.6 Hz, 1H), 7.10 – 7.00 (m, 3H), 6.96 and 6.93 (d, *J* = 12.3 Hz, 2H), 5.29 and 5.25 (dd, *J* = 9.6, 5.2 Hz, 1H), 4.86 and 4.85 (d, *J* = 12.0 Hz, 1H), 4.664 and 4.658 (d, *J* = 12.0 Hz, 1H), 4.58 and 4.56 (d, *J* = 16.0 Hz, 1H), 4.42 and 4.38 (d, *J* = 16.2 Hz, 1H), 3.69 – 3.58 (m, 4H), 3.43 – 3.36 (m, 2H), 3.07 (ddd, *J* = 9.4, 7.4, 2.1 Hz, 1H), 3.01 – 2.77 (m, 2H), 2.42 – 2.19 (m, 7H), 2.15 (ddd, *J* = 7.5, 5.3, 2.2 Hz, 1H).

**<sup>13</sup>C{<sup>1</sup>H} NMR** (101 MHz, CDCl<sub>3</sub>, reported as a mixture of diastereomers) δ 171.9, 171.8, 171.29, 171.27, 169.7, 169.53, 169.48, 141.7, 141.6, 137.3, 137.2, 132.0, 131.9, 131.5, 131.4, 131.30, 131.27, 131.19, 131.18, 129.12, 129.06, 129.05, 128.0, 122.6, 95.3, 95.2, 74.4, 74.3, 67.0, 62.9, 53.50, 53.46, 52.03, 51.96, 46.61, 46.50, 37.1, 37.0, 31.7, 29.8, 29.7, 29.6, 23.63, 23.60, 19.7, 19.6.

**SFC analysis:** **25a** (Trefoil® CEL2, 35% 1:1 MeOH:PrOH with 0.2% formic acid in CO<sub>2</sub>, 2.5 mL/min, diode array) indicated 83:17 d.r.: *t*<sub>R</sub> (major diastereomers) = 6.04 and 8.83 min, *t*<sub>R</sub> (minor diastereomers) = 6.80 and 13.50 min. **25b** indicated the opposite diastereomers in 85:15 d.r.

**Purity (SFC): 25a – 99%; 25b – 99%**

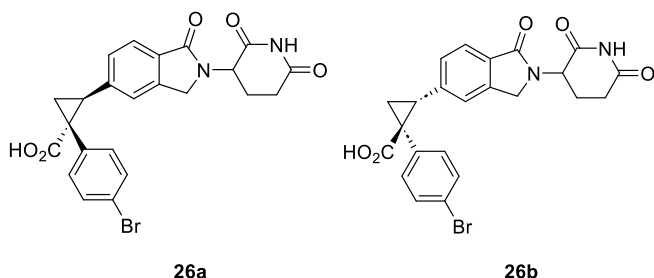

**26a**

**26b**

**(1*R*,2*S*)-1-(4-bromophenyl)-2-(2-(2,6-dioxopiperidin-3-yl)-1-oxoisoindolin-5-yl)cyclopropane-1-carboxylic acid (26a).**

**(1*S*,2*R*)-1-(4-bromophenyl)-2-(2-(2,6-dioxopiperidin-3-yl)-1-oxoisoindolin-5-yl)cyclopropane-1-carboxylic acid (26b).**

A 100 mL round-bottom flask was charged with a PTFE magnetic stir bar and zinc dust (754 mg, 16 equiv, 11.5 mmol) under ambient conditions, followed by 2,2,2-trichloroethyl (1*S*,2*R*)-1-(4-bromophenyl)-2-(2-(2,6-dioxopiperidin-3-yl)-1-oxoisoindolin-5-yl)cyclopropane-1-carboxylate (443 mg, 1.0 equiv, 0.72 mmol). Tetrahydrofuran (16.6 mL) was charged via syringe followed by acetate buffer (10 mL, pH = 3.7, 1.2 M in H<sub>2</sub>O, NaOAc/AcOH). The reaction was stirred at room temperature for 18 hours, after which the reaction was filtered through Celite®, rinsing with ethyl acetate. The aqueous layer was extracted thrice with 50 mL portions of ethyl acetate, after which the combined organics were washed with 150 mL brine. The combined organics were dried over magnesium sulfate, then filtered and concentrated in vacuo. The crude material was purified via flash column chromatography (C18, 10-95% MeCN in H<sub>2</sub>O, 0.1% trifluoroacetic acid buffer), which gave (1*R*,2*S*)-1-(4-bromophenyl)-2-(2-(2,6-dioxopiperidin-3-yl)-1-oxoisoindolin-5-yl)cyclopropane-1-carboxylic acid as an amorphous white solid (280 mg, 0.58 mmol, 83% yield).

Compound **26b** was prepared in the same manner using zinc dust (727 mg, 16 equiv, 11.1 mmol), 2,2,2-trichloroethyl (1*R*,2*S*)-1-(4-bromophenyl)-2-(2-(2,6-dioxopiperidin-3-yl)-1-oxoisoindolin-5-yl)cyclopropane-

1-carboxylate (427 mg, 1.0 equiv, 0.70 mmol), tetrahydrofuran (16.0 mL), and acetate buffer (9.6 mL), which gave (1*S*,2*R*)-1-(4-bromophenyl)-2-(2-(2,6-dioxopiperidin-3-yl)-1-oxoisindolin-5-yl)cyclopropane-1-carboxylic acid (286 mg, 0.59 mmol, 82% yield) as an amorphous white solid.

**HRMS (APCI):**  $m/z$  483.0559 ( $[M+H]^+$  requires 483.0550), calc'd for C<sub>23</sub>H<sub>20</sub>O<sub>5</sub>N<sub>2</sub><sup>79</sup>Br

**<sup>1</sup>H NMR** (600 MHz, CD<sub>3</sub>OD, reported as a mixture of diastereomers)  $\delta$  7.55 – 7.42 (m, 1H), 7.26 (d,  $J$  = 8.1 Hz, 2H), 7.14 and 7.10 (s, 1H), 7.05-6.98 (m, 1H, partially obscured by signal at 7.00), 7.00 (d,  $J$  = 8.0 Hz, 3H), 5.10 and 5.07 (dd,  $J$  = 10.9, 5.2 Hz, 1H), 4.39 and 4.34 (d,  $J$  = 17.0 Hz, 1H), 4.27 and 4.26 (d,  $J$  = 17.0 Hz, 1H), 3.27 (t,  $J$  = 8.2 Hz, 1H), 2.87 (ddd,  $J$  = 18.5, 13.6, 5.4 Hz, 1H), 2.81 – 2.70 (m, 1H), 2.43 (pd,  $J$  = 13.5, 4.5 Hz, 1H), 2.17-2.08 (m, 3H).

**<sup>13</sup>C NMR** (101 MHz, CD<sub>3</sub>OD)  $\delta$  176.2, 174.7, 172.22, 172.20, 171.19, 171.17, 143.5, 143.01, 143.29, 135.7, 135.6, 135.0, 134.9, 131.9, 131.0, 130.9, 129.7, 129.3, 124.3, 124.0, 123.73, 123.71, 122.0, 53.6, 53.5, 38.6, 38.5, 34.0, 32.3, 24.0, 20.5, 20.4.

**SFC analysis:** **26a** (Chiralpak® AS3, 20% 1:1 EtOH:PrOH with 0.2% formic acid in CO<sub>2</sub>, 2.5 mL/min, diode array) indicated 99:1 d.r.:  $t_R$  (major diastereomers) = 4.56 and 6.30 min,  $t_R$  (minor diastereomers) = 5.73 and 8.81 min. **26b** indicated the opposite diastereomers in 99:1 d.r.

**Purity (SFC):** **26a** – 98%; **26b** – 98%

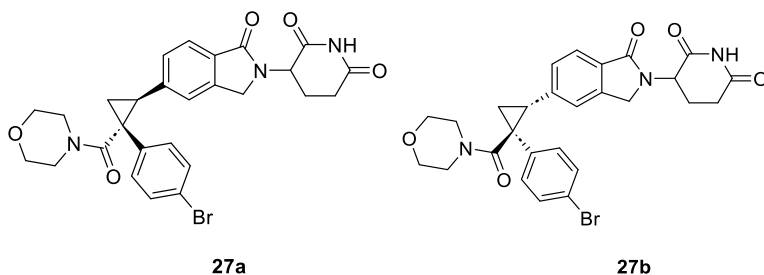

**3-(5-((1*S*,2*R*)-2-(4-bromophenyl)-2-(morpholine-4-carbonyl)cyclopropyl)-1-oxoisindolin-2-yl)piperidine-2,6-dione (27a).**

**3-(5-((1*R*,2*S*)-2-(4-bromophenyl)-2-(morpholine-4-carbonyl)cyclopropyl)-1-oxoisindolin-2-yl)piperidine-2,6-dione (27b).**

A 4 mL scintillation vial equipped with a PTFE magnkjetic stir bar was flame-dried under vacuum and backfilled with dry nitrogen. The vial was charged with (1*S*,2*R*)-1-(4-bromophenyl)-2-(2-(2,6-dioxopiperidin-3-yl)-1-oxoisindolin-5-yl)cyclopropane-1-carboxylic acid (50 mg, 1.0 equiv, 0.10 mmol) and N-(chloro(dimethylamino)methylene)-N-methylmethanaminium hexafluorophosphate(V) (34 mg, 1.2 equiv, 0.12 mmol). Morpholine (11  $\mu$ L, 1.3 equiv, 0.13 mmol), 1-methyl-1H-imidazole (28  $\mu$ L, 3.5 equiv, 0.35 mmol), and acetonitrile (0.25 mL) were charged successively by syringe, and the reaction was stirred at room temperature for 18 hours. The reaction was stirred at room temperature for 18 hours, after which the reaction was partitioned between water (50 mL) and ethyl acetate (50 mL). The aqueous layer was extracted thrice with 50 mL portions of ethyl acetate, after which the combined organics were washed with 150 mL of brine. The combined organics were dried over magnesium sulfate, then filtered and concentrated in vacuo. The crude material was purified via flash column chromatography (SiO<sub>2</sub>, 0-10% methanol in CH<sub>2</sub>Cl<sub>2</sub>), which gave 3-(5-((1*S*,2*R*)-2-(4-bromophenyl)-2-(morpholine-4-carbonyl)cyclopropyl)-1-oxoisindolin-2-yl)piperidine-2,6-dione as an amorphous white solid (31 mg, 55  $\mu$ mol, 55% yield).

Compound **27b** was prepared in the same manner from (1*S*,2*R*)-1-(4-bromophenyl)-2-(2-(2,6-dioxopiperidin-3-yl)-1-oxoisindolin-5-yl)cyclopropane-1-carboxylic acid, which gave 3-(5-((1*R*,2*S*)-2-(4-bromophenyl)-2-(morpholine-4-carbonyl)cyclopropyl)-1-oxoisindolin-2-yl)piperidine-2,6-dione as an amorphous white solid (34 mg, 60  $\mu$ mol, 60% yield).

**HRMS (APCI):**  $m/z$  552.1139 ( $[M+H]^+$  requires 552.1129), calc'd for C<sub>27</sub>H<sub>27</sub>O<sub>5</sub>N<sub>3</sub><sup>79</sup>Br

**<sup>1</sup>H NMR** (600 MHz, CDCl<sub>3</sub>, reported as a mixture of diastereomers)  $\delta$  7.99 and 7.98 (s, 1H), 7.60 (d,  $J$  and 7.58 (d,  $J$  = 5.9 Hz, 1H), 7.29 – 7.26 (m, 2H, partially obscured by solvent signal), 7.17 and 7.10 (s, 1H), 7.07

and 7.02 (dd,  $J = 7.9, 1.4$  Hz, 1H), 6.99 – 6.92 (m, 2H), 5.160 and 5.156 (dd,  $J = 13.3, 5.1$  Hz, 1H), 4.343 and 4.338 (d,  $J = 15.9$  Hz, 1H), 4.17 and 4.16 (d,  $J = 15.9$  Hz, 1H), 3.74 – 3.37 (m, 7H), 3.30 (dt,  $J = 9.2, 6.9$  Hz, 1H), 3.18 (s, 1H), 2.92 – 2.87 (m, 1H), 2.80 (ddd,  $J = 18.1, 13.4, 5.4$  Hz, 1H), 2.37 – 2.25 (m, 1H), 2.23 – 2.13 (m, 1H), 2.08 (ddd,  $J = 7.0, 5.8, 3.2$  Hz, 1H), 1.68 (ddd,  $J = 9.1, 5.8, 4.5$  Hz, 1H).

$^{13}\text{C}$  NMR (101 MHz,  $\text{CDCl}_3$ )  $\delta$  171.74, 171.72, 170.27, 170.23, 170.0, 169.1, 141.4, 141.25, 141.21, 134.26, 134.21, 131.74, 131.71, 129.87, 129.7, 128.6, 128.3, 123.8, 123.51, 123.48, 123.2, 121.2, 121.1, 66.4, 51.8, 51.7, 46.80, 46.76, 38.1, 37.9, 31.6, 30.2, 30.1, 23.4, 16.1, 16.0.

**SFC analysis:** **27a** (Chiralcel® OJ-3, 20% 1:1 MeOH:PrOH with 0.2% formic acid in  $\text{CO}_2$ , 2.5 mL/min, diode array) indicated 99:1 d.r.:  $t_{\text{R}}$  (major diastereomers) = 2.80 and 3.65 min,  $t_{\text{R}}$  (minor diastereomers) = 3.21 and 4.77 min. **27b** indicated the opposite diastereomers in 99:1 d.r.

**Purity (SFC):** **27a** – 98%; **27b** – 98%

## Section 3: X-ray Crystallographic Data for *R*-15a

Submitted by: **William Tracy, Huw Davies Lab**

Solved by: **John Bacsá, Mackenzie Young**

**$R_1 = 5.45\%$**

### Crystal Data and Experimental

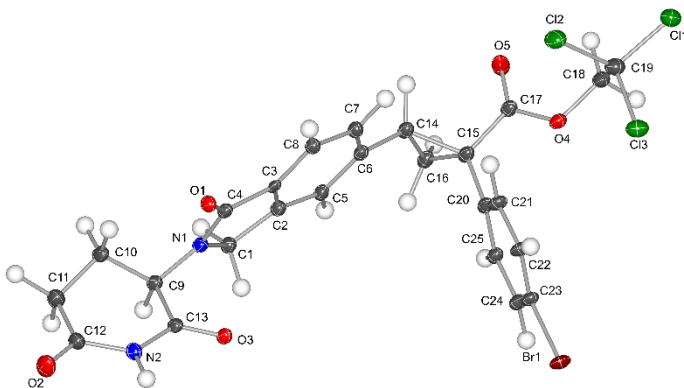

matrix least squares minimisation on  $F^2$ .

**Crystal Data.**  $\text{C}_{25}\text{H}_{20}\text{BrCl}_3\text{N}_2\text{O}_5$ ,  $M_r = 614.709$ , monoclinic,  $P2_1$  (No. 4),  $a = 6.1901(4)$  Å,  $b = 9.2069(6)$  Å,  $c = 22.1261(17)$  Å,  $\beta = 90.543(7)^\circ$ ,  $\alpha = \gamma = 90^\circ$ ,  $V = 1260.94(16)$  Å<sup>3</sup>,  $T = 104(6)$  K,  $Z = 2$ ,  $Z' = 1$ ,  $\mu(\text{Mo } K\alpha) = 1.988$ , 15376 reflections measured, 5610 unique ( $R_{\text{int}} = 0.0782$ ) which were used in all calculations. The final  $wR_2$  was 0.1153 (all data) and  $R_1$  was 0.0545 ( $I \geq 2 \sigma(I)$ ).

**Experimental.** Single colourless plate-shaped crystals of WT-05-553 were crystallized from methanol by slow evaporation. A suitable crystal with dimensions  $0.13 \times 0.10 \times 0.05$  mm<sup>3</sup> was selected and mounted on a loop with paratone on a XtaLAB Synergy, Dualflex, HyPix diffractometer. The crystal was kept at a steady  $T = 104(6)$  K during data collection. The structure was solved with the ShelXT (Sheldrick, 2015) solution program using dual methods and by using Olex2 1.5-alpha (Dolomanov et al., 2009) as the graphical interface. The model was refined with olex2.refine 1.5-alpha (Bourhis et al., 2015) using full

|                                                |                                                                                 |
|------------------------------------------------|---------------------------------------------------------------------------------|
| <b>Compound</b>                                | WT-05-553                                                                       |
| Formula                                        | C <sub>25</sub> H <sub>20</sub> BrCl <sub>3</sub> N <sub>2</sub> O <sub>5</sub> |
| <i>D</i> <sub>calc.</sub> / g cm <sup>-3</sup> | 1.619                                                                           |
| <i>μ</i> /mm <sup>-1</sup>                     | 1.988                                                                           |
| Formula Weight                                 | 614.709                                                                         |
| Color                                          | colorless                                                                       |
| Shape                                          | plate-shaped                                                                    |
| Size/mm <sup>3</sup>                           | 0.13×0.10×0.05                                                                  |
| <i>T</i> /K                                    | 104(6)                                                                          |
| Crystal System                                 | monoclinic                                                                      |
| Flack Parameter                                | -0.006(8)                                                                       |
| Hooft Parameter                                | -0.006(8)                                                                       |
| Space Group                                    | <i>P</i> 2 <sub>1</sub>                                                         |
| <i>a</i> /Å                                    | 6.1901(4)                                                                       |
| <i>b</i> /Å                                    | 9.2069(6)                                                                       |
| <i>c</i> /Å                                    | 22.1261(17)                                                                     |
| <i>α</i> /°                                    | 90                                                                              |
| <i>β</i> /°                                    | 90.543(7)                                                                       |
| <i>γ</i> /°                                    | 90                                                                              |
| <i>V</i> /Å <sup>3</sup>                       | 1260.94(16)                                                                     |
| <i>Z</i>                                       | 2                                                                               |
| <i>Z</i> '                                     | 1                                                                               |
| Wavelength/Å                                   | 0.71073                                                                         |
| Radiation type                                 | Mo K <sub>α</sub>                                                               |
| <i>θ</i> <sub>min</sub> /°                     | 3.41                                                                            |
| <i>θ</i> <sub>max</sub> /°                     | 27.57                                                                           |
| Measured Refl's.                               | 15376                                                                           |
| Indep't Refl's                                 | 5610                                                                            |
| Refl's I≥2 σ(I)                                | 4416                                                                            |
| <i>R</i> <sub>int</sub>                        | 0.0782                                                                          |
| Parameters                                     | 451                                                                             |
| Restraints                                     | 823                                                                             |
| Largest Peak                                   | 1.5961                                                                          |
| Deepest Hole                                   | -0.6735                                                                         |
| GooF                                           | 1.0057                                                                          |
| <i>wR</i> <sub>2</sub> (all data)              | 0.1153                                                                          |
| <i>wR</i> <sub>2</sub>                         | 0.1076                                                                          |
| <i>R</i> <sub>1</sub> (all data)               | 0.0786                                                                          |
| <i>R</i> <sub>1</sub>                          | 0.0545                                                                          |

## Structure Quality Indicators

|                     |                                            |        |                 |      |                            |       |            |       |      |           |
|---------------------|--------------------------------------------|--------|-----------------|------|----------------------------|-------|------------|-------|------|-----------|
| <b>Reflections:</b> | d min (MoK $\alpha$ )<br>2 $\Theta$ =55.1° | 0.77   | I/ $\sigma$ (I) | 10.2 | R <sub>int</sub><br>m=2.69 | 7.82% | Full 50.5° | 95.6  |      |           |
| <b>Refinement:</b>  | Shift                                      | -0.001 | Max Peak        | 1.6  | Min Peak                   | -0.7  | Goof       | 1.006 | Hoof | -0.006(8) |

A colorless plate-shaped crystal with dimensions 0.13 × 0.10 × 0.05 mm<sup>3</sup> was mounted on a loop with paratone. Data were collected using a XtaLAB Synergy, Dualflex, HyPix diffractometer equipped with an Oxford Cryosystems low-temperature device operating at  $T = 104(6)$  K.

Data were measured using  $\omega$  scans with Mo K $\alpha$  radiation. The diffraction pattern was indexed and the total number of runs and images was based on the strategy calculation from the program CrysAlisPro system (CCD 43.92a 64-bit (release 05-10-2023)). The maximum resolution that was achieved was  $\Theta = 27.57^\circ$  (0.77 Å).

The unit cell was refined using CrysAlisPro 1.171.43.121a (Rigaku OD, 2024) on 3358 reflections, 22% of the observed reflections.

Data reduction, scaling and absorption corrections were performed using CrysAlisPro 1.171.43.121a (Rigaku OD, 2024). The final completeness is 98.65 % out to 27.57° in  $\Theta$ . An analytical numeric absorption correction using a multifaceted crystal model based on expressions derived by R.C. Clark & J.S. Reid. (Clark, R. C. & Reid, J. S. (1995). Acta Cryst. A51, 887-897) was performed using CrysAlisPro 1.171.43.121a (Rigaku Oxford Diffraction, 2024). An empirical absorption correction using spherical harmonics, implemented in SCALE3 ABSPACK scaling algorithm was also applied. The absorption coefficient  $\mu$  of this material is 1.988 mm<sup>-1</sup> at this wavelength ( $\lambda = 0.71073\text{Å}$ ) and the minimum and maximum transmissions are 0.821 and 0.924.

The structure was solved and the space group  $P2_1$  (# 4) determined by the ShelXT (Sheldrick, 2015) structure solution program using dual methods and refined by full matrix least squares minimisation on  $F^2$  using version of olex2.refine 1.5-alpha (Bourhis et al., 2015). All atoms, even hydrogen atoms, were refined anisotropically. Hydrogen atom positions were located from the electron densities and freely refined using Hirshfeld scattering factors. Refinement was by using NoSpherA2, an implementation of non-spherical atom-form-factors (F. Kleemiss, H. Puschmann, O. Dolomanov, S.Grabowsky - <https://doi.org/10.1039/D0SC05526C> – 2020). NoSpherA2 implementation of HAR makes use of tailor-made aspherical atomic form factors calculated from a Hirshfeld-partitioned electron density (ED) not from spherical-atom form factors. The ED was calculated from a Gaussian basis set single determinant SCF wavefunction from DFT using selected functionals for a fragment of this crystal. This fragment was embedded in an electrostatic crystal field by employing cluster charges. The following options were used: software: SOFTWARE: ORCA PARTITIONING: NoSpherA2 INT ACCURACY: Normal METHOD: PBE BASIS SET: x2c-SVP CHARGE: 0 MULTIPLICITY: 1 SOLVATION: Methanol RELATIVISTIC: DKH2 DATE: 2024-05-14\_13-44-20

There is a single formula unit in the asymmetric unit, which is represented by the reported sum formula. In other words: Z is 2 and Z' is 1. The moiety formula is C<sub>25</sub> H<sub>20</sub> Br Cl<sub>3</sub> N<sub>2</sub> O<sub>5</sub>.

The Flack parameter was refined to -0.006(8). Determination of absolute structure using Bayesian statistics on Bijvoet differences using the Olex2 results in -0.006(8). The chiral atoms in this structure are: C9(R), C14(S), C15(R). Note: The Flack parameter is used to determine chirality of the crystal studied, the value should be near 0, a value of 1 means that the stereochemistry is wrong and the model should be inverted. A value of 0.5 means that the crystal consists of a racemic mixture of the two enantiomers.

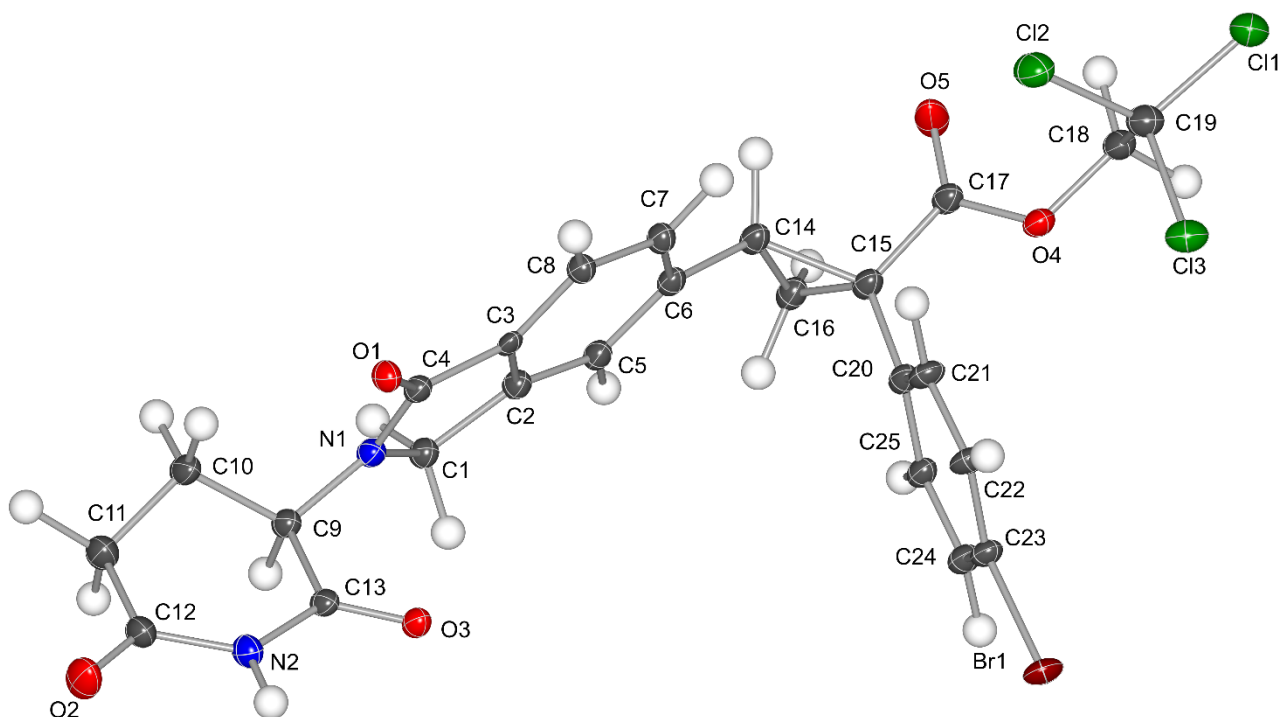

**Figure 1** A thermal ellipsoidal representation of the asymmetric unit in the crystal structure (50% probability) which consists of one whole molecule. The chiral atoms in this structure are: C9(R), C14(S), and C15(R).

## Data Plots: Diffraction Data

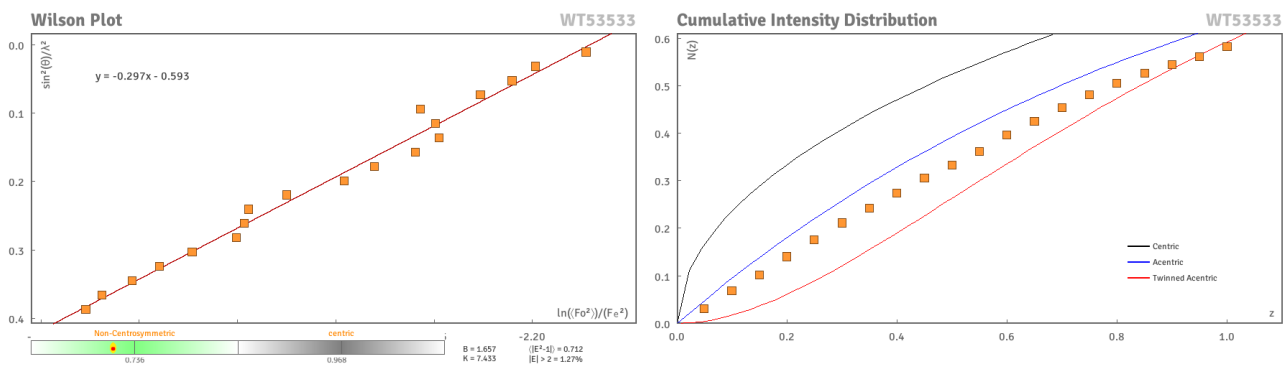

Systematic Absences Intensity Distribution WT53533

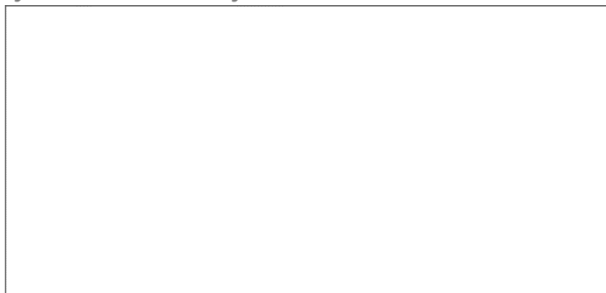

Completeness Plot WT53533

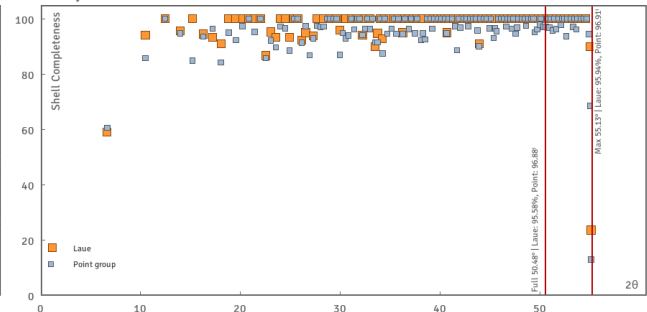

I/σ(I) vs. Resolution WT53533

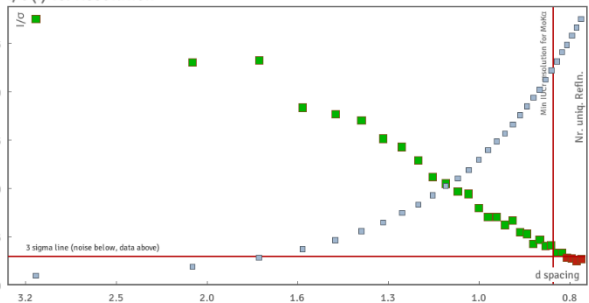

### Data Plots: Refinement and Data

Fobs vs Fcalc WT53533

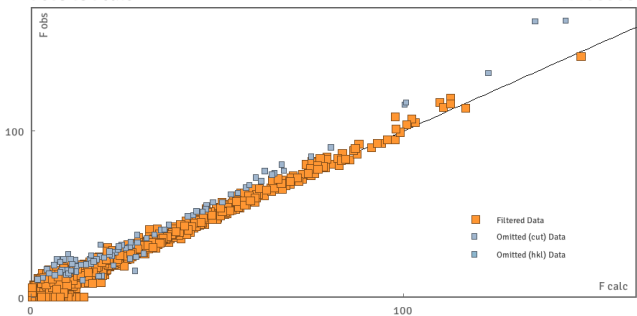

Normal Probability Plot WT53533

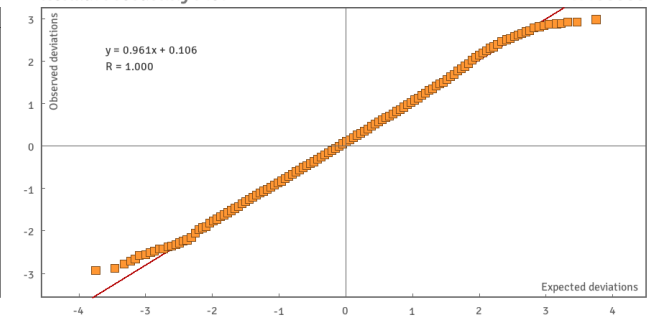

### Reflection Statistics

|                                     |                               |                                |                |
|-------------------------------------|-------------------------------|--------------------------------|----------------|
| Total reflections (after filtering) | 15067                         | Unique reflections             | 5610           |
| Completeness                        | 0.969                         | Mean I/σ                       | 9.61           |
| hkl <sub>max</sub> collected        | (8, 11, 28)                   | hkl <sub>min</sub> collected   | (-8, -11, -28) |
| hkl <sub>max</sub> used             | (8, 11, 28)                   | hkl <sub>min</sub> used        | (-8, -11, 0)   |
| Lim d <sub>max</sub> collected      | 100.0                         | Lim d <sub>min</sub> collected | 0.36           |
| d <sub>max</sub> used               | 5.98                          | d <sub>min</sub> used          | 0.77           |
| Friedel pairs                       | 3967                          | Friedel pairs merged           | 0              |
| Inconsistent equivalents            | 5                             | R <sub>int</sub>               | 0.079          |
| R <sub>sigma</sub>                  | 0.0982                        | Intensity transformed          | 0              |
| Omitted reflections                 | 309                           | Omitted by user (OMIT hkl)     | 3              |
| Multiplicity                        | (5283, 3149, 948, 182, 41, 3) | Maximum multiplicity           | 9              |
| Removed systematic absences         | 0                             | Filtered off (Shel/OMIT)       | 0              |

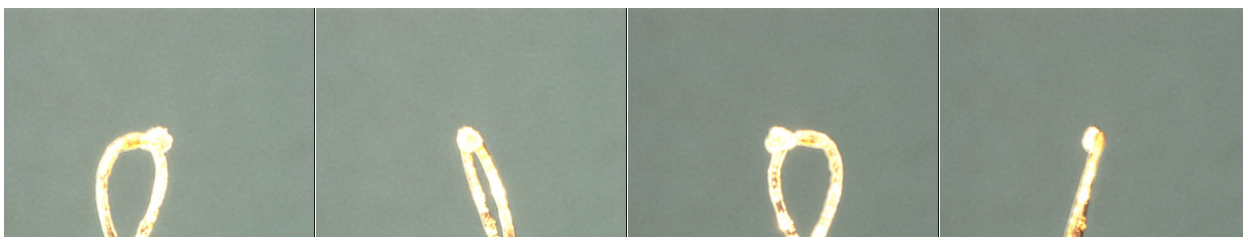

**Table 1:** Fractional Atomic Coordinates ( $\times 10^4$ ) and Equivalent Isotropic Displacement Parameters ( $\text{\AA}^2 \times 10^3$ ) for WT-05-553.  $U_{eq}$  is defined as 1/3 of the trace of the orthogonalised  $U_{ij}$ .

| Atom | x          | y          | z          | $U_{eq}$  |
|------|------------|------------|------------|-----------|
| Br1  | 5371.5(7)  | 1137.5(3)  | 1682.0(2)  | 21.17(12) |
| Cl3  | 3100.3(17) | 5997.6(11) | 86.8(5)    | 26.1(3)   |
| Cl1  | 761(2)     | 8186.8(11) | -588.1(6)  | 28.2(3)   |
| Cl2  | 2633(2)    | 8864.4(11) | 589.3(6)   | 29.2(3)   |
| O1   | 7753(5)    | 8378(3)    | 4542.3(14) | 17.2(6)   |
| O2   | 10793(5)   | 6114(5)    | 6695.3(14) | 32.8(8)   |
| O3   | 7875(5)    | 4979(3)    | 4887.5(14) | 17.5(7)   |
| O4   | -410(5)    | 6480(3)    | 1003.0(14) | 19.3(5)   |
| O5   | -2542(6)   | 8132(4)    | 1452.0(16) | 33.7(9)   |
| N1   | 4848(6)    | 7116(4)    | 4900.2(18) | 16.2(6)   |
| N2   | 9217(6)    | 5538(4)    | 5810.9(18) | 18.4(8)   |
| C1   | 2699(7)    | 6635(5)    | 4700(2)    | 16.9(7)   |
| C2   | 2630(7)    | 7101(4)    | 4056(2)    | 16.0(7)   |
| C3   | 4518(7)    | 7884(4)    | 3935(2)    | 13.4(7)   |
| C4   | 5927(7)    | 7865(4)    | 4472(2)    | 15.2(7)   |
| C5   | 1035(7)    | 6939(4)    | 3619(2)    | 16.3(8)   |
| C6   | 1334(7)    | 7600(5)    | 3054(2)    | 15.8(6)   |
| C7   | 3204(7)    | 8426(4)    | 2945(2)    | 16.9(8)   |
| C8   | 4842(7)    | 8574(4)    | 3376(2)    | 16.2(8)   |
| C9   | 5785(7)    | 6673(4)    | 5473(2)    | 17.0(6)   |
| C10  | 6482(8)    | 7933(5)    | 5882(2)    | 22.2(9)   |
| C11  | 7441(9)    | 7325(5)    | 6465(2)    | 25.4(9)   |
| C12  | 9287(7)    | 6297(5)    | 6349(2)    | 21.8(9)   |
| C13  | 7694(7)    | 5653(4)    | 5353(2)    | 15.7(8)   |
| C14  | -410(8)    | 7585(5)    | 2582(2)    | 17.9(5)   |
| C15  | -528(7)    | 6447(4)    | 2067(2)    | 17.8(4)   |
| C16  | -2184(7)   | 6491(4)    | 2567(2)    | 19.1(5)   |
| C17  | -1285(7)   | 7124(5)    | 1485(2)    | 18.5(6)   |
| C18  | -833(8)    | 7092(5)    | 422(2)     | 21.0(5)   |
| C19  | 1315(9)    | 7524(5)    | 144(2)     | 23.8(4)   |
| C20  | 963(7)     | 5191(5)    | 2009(2)    | 16.9(5)   |
| C21  | 3039(7)    | 5365(5)    | 1791(2)    | 18.8(8)   |
| C22  | 4392(8)    | 4176(5)    | 1687(2)    | 20.1(9)   |
| C23  | 3612(8)    | 2779(5)    | 1814(2)    | 17.2(8)   |
| C24  | 1527(8)    | 2574(5)    | 2030(2)    | 18.4(8)   |
| C25  | 228(8)     | 3780(5)    | 2133(2)    | 17.6(8)   |

**Table 2:** Anisotropic Displacement Parameters ( $\times 10^4$ ) for WT-05-553. The anisotropic displacement factor exponent takes the form:  $-2\pi^2[h^2a^{*2} \times U_{11} + \dots + 2hka^* \times b^* \times U_{12}]$

| Atom | $U_{11}$ | $U_{22}$  | $U_{33}$ | $U_{23}$ | $U_{13}$ | $U_{12}$ |
|------|----------|-----------|----------|----------|----------|----------|
| Br1  | 22.6(2)  | 11.99(18) | 28.9(3)  | 5.0(2)   | 1.08(16) | -0.4(2)  |



| Atom | $U_{11}$ | $U_{22}$ | $U_{33}$ | $U_{23}$ | $U_{13}$ | $U_{12}$ |
|------|----------|----------|----------|----------|----------|----------|
| Cl3  | 27.2(5)  | 19.5(5)  | 31.5(6)  | 1.8(4)   | 0.1(4)   | 3.2(4)   |
| Cl1  | 36.4(7)  | 22.4(6)  | 25.6(5)  | 4.3(4)   | -3.2(3)  | 2.4(3)   |
| Cl2  | 35.7(7)  | 20.7(5)  | 31.0(6)  | -1.6(4)  | -7.2(4)  | 0.8(3)   |
| O1   | 18.1(8)  | 17.2(14) | 16.3(12) | -0.9(5)  | -4.0(5)  | -0.6(7)  |
| O2   | 38.0(15) | 32.9(17) | 27.2(15) | 10.1(13) | -15.7(8) | -6.6(14) |
| O3   | 18.8(17) | 16.0(14) | 17.6(11) | 1.9(11)  | -5.1(8)  | -2.3(7)  |
| O4   | 23.5(11) | 13.6(10) | 20.9(6)  | 3.4(5)   | -3.4(3)  | -2.2(3)  |
| O5   | 45.3(17) | 33.9(13) | 21.7(12) | 25.3(8)  | -7.5(6)  | -4.9(5)  |
| N1   | 17.9(8)  | 13.8(13) | 16.9(7)  | 0.8(5)   | -3.2(4)  | -1.3(5)  |
| N2   | 18.5(15) | 19.0(16) | 17.6(11) | -0.5(8)  | -4.7(7)  | -0.3(8)  |
| H2   | 17(8)    | 10(20)   | 18(9)    | -3(6)    | -2(4)    | 3(6)     |
| C1   | 18.1(8)  | 15.1(16) | 17.3(7)  | 0.4(6)   | -3.2(4)  | -1.6(5)  |
| H1a  | 19(5)    | 15(2)    | 17(5)    | 0.3(10)  | -2.3(19) | -1.9(10) |
| H1b  | 18(3)    | 16(5)    | 19(4)    | 0.1(15)  | -3.0(14) | -2.9(17) |
| C2   | 17.2(8)  | 13.7(16) | 17.2(7)  | 1.2(6)   | -3.0(4)  | -2.1(5)  |
| C3   | 15.8(8)  | 9.0(15)  | 15.4(7)  | 3.7(6)   | -2.3(4)  | -3.9(5)  |
| C4   | 17.1(8)  | 12.2(16) | 16.2(7)  | 1.3(6)   | -3.3(4)  | -2.0(5)  |
| C5   | 17.0(9)  | 14.3(16) | 17.5(7)  | 2.2(6)   | -3.1(4)  | -3.2(5)  |
| H5   | 27(8)    | 50(30)   | 23(6)    | -15(7)   | -10(3)   | 9(5)     |
| C6   | 16.4(9)  | 13.5(12) | 17.5(7)  | 3.4(5)   | -2.6(4)  | -3.4(4)  |
| C7   | 17.3(9)  | 16.6(17) | 16.5(8)  | 1.7(6)   | -3.6(4)  | -2.1(5)  |
| H7   | 26(7)    | 50(20)   | 23(4)    | -16(6)   | -12(3)   | 13(5)    |
| C8   | 17.3(9)  | 14.9(16) | 16.4(8)  | 1.2(6)   | -3.4(4)  | -1.3(5)  |
| H8   | 26(7)    | 50(20)   | 23(4)    | -16(6)   | -12(3)   | 13(5)    |
| C9   | 18.9(10) | 14.7(12) | 17.2(8)  | 0.8(6)   | -3.6(4)  | -0.9(4)  |
| H9   | 19(4)    | 15(4)    | 18(4)    | 1.6(16)  | -3.1(15) | -0.8(16) |
| C10  | 30(2)    | 15.6(12) | 20.6(13) | 0.5(7)   | -8.2(8)  | -1.9(6)  |
| H10a | 30(4)    | 18(4)    | 20(5)    | -0.4(16) | -9.0(17) | -1.6(17) |
| H10b | 31(4)    | 17(4)    | 22(5)    | 1.8(16)  | -7.6(16) | -2.0(18) |
| C11  | 32.4(16) | 23.4(17) | 20.3(14) | 6.0(10)  | -6.7(7)  | -1.1(7)  |
| H11a | 32(5)    | 24(4)    | 21(4)    | 5.9(17)  | -7.4(18) | -2.1(16) |
| H11b | 32(4)    | 24(5)    | 22(5)    | 6.0(18)  | -6.3(16) | 0.5(18)  |
| C12  | 29.2(15) | 18.6(17) | 17.6(12) | 2.2(10)  | -6.6(7)  | -0.1(8)  |
| C13  | 17.5(12) | 12.9(15) | 16.7(11) | -0.7(7)  | -3.7(5)  | -0.7(7)  |
| C14  | 18.1(8)  | 15.7(8)  | 19.7(7)  | 3.7(4)   | -4.6(3)  | -3.8(3)  |
| H14  | 19(6)    | 16(2)    | 22(6)    | 3.7(11)  | -6(2)    | -3.5(11) |
| C15  | 18.1(8)  | 15.3(7)  | 20.0(6)  | 3.9(3)   | -4.8(3)  | -3.7(3)  |
| C16  | 18.7(8)  | 17.3(11) | 21.1(9)  | 2.8(4)   | -4.0(4)  | -4.8(4)  |
| H16a | 19(5)    | 19(5)    | 22(5)    | 2.6(17)  | -4.1(18) | -4(2)    |
| H16b | 20(2)    | 22(6)    | 26(7)    | 3.9(12)  | -4.4(11) | -3(2)    |
| C17  | 19.1(12) | 15.8(10) | 20.5(6)  | 3.4(5)   | -5.5(3)  | -3.3(3)  |
| C18  | 26.4(7)  | 15.2(11) | 21.4(7)  | 1.6(4)   | -4.5(3)  | -1.2(4)  |
| H18a | 27(5)    | 16(3)    | 21(4)    | 1.2(15)  | -4.2(16) | -1.1(15) |
| H18b | 26(4)    | 16(3)    | 23(6)    | 1.6(15)  | -4.7(17) | -1.0(15) |
| C19  | 26.9(7)  | 18.8(6)  | 25.5(6)  | 1.4(3)   | -2.9(3)  | 1.4(3)   |
| C20  | 17.7(8)  | 14.8(7)  | 18.3(12) | 3.4(3)   | -4.9(4)  | -3.4(4)  |
| C21  | 18.6(8)  | 12.3(6)  | 25(2)    | 4.2(3)   | -2.4(6)  | -2.1(4)  |
| H21  | 30(5)    | 11(6)    | 100(30)  | 6.7(15)  | 28(6)    | 5(3)     |
| C22  | 19.2(9)  | 12.0(6)  | 29(2)    | 4.1(3)   | -0.4(6)  | -1.3(4)  |
| H22  | 30(5)    | 11(6)    | 100(30)  | 6.7(15)  | 28(6)    | 5(3)     |
| C23  | 19.1(8)  | 11.8(5)  | 21(2)    | 3.7(3)   | -3.2(6)  | -2.0(4)  |
| C24  | 19.2(8)  | 14.4(7)  | 22(2)    | 3.2(3)   | -2.7(6)  | -2.6(4)  |
| H24  | 29(8)    | 15(2)    | 90(40)   | 4.1(14)  | 22(9)    | 1.6(19)  |
| C25  | 18.7(8)  | 14.8(7)  | 19(2)    | 3.3(3)   | -4.3(6)  | -3.3(4)  |
| H25  | 38(9)    | 17(6)    | 140(50)  | 7.1(16)  | 44(11)   | 7(3)     |

**Table 3:** Bond Lengths in Å for WT-05-553.

| Atom | Atom | Length/Å | Atom | Atom | Length/Å   |
|------|------|----------|------|------|------------|
| Br1  | C23  | 1.887(4) | C9   | H9   | 1.17(5)    |
| Cl3  | C19  | 1.793(5) | C9   | C10  | 1.531(6)   |
| Cl1  | C19  | 1.762(5) | C9   | C13  | 1.534(6)   |
| Cl2  | C19  | 1.773(5) | C10  | H10a | 1.08(3)    |
| O1   | C4   | 1.234(5) | C10  | H10b | 1.08(3)    |
| O2   | C12  | 1.213(5) | C10  | C11  | 1.523(6)   |
| O3   | C13  | 1.208(5) | C11  | H11a | 1.12(4)    |
| O4   | C17  | 1.340(6) | C11  | H11b | 1.12(4)    |
| O4   | C18  | 1.426(6) | C11  | C12  | 1.508(7)   |
| O5   | C17  | 1.213(5) | C14  | H14  | 1.070(3)   |
| N1   | C1   | 1.467(5) | C14  | C15  | 1.550(6)   |
| N1   | C4   | 1.353(6) | C14  | C16  | 1.490(6)   |
| N1   | C9   | 1.447(6) | C15  | C16  | 1.516(7)   |
| N2   | H2   | 0.97(5)  | C15  | C17  | 1.500(6)   |
| N2   | C12  | 1.381(6) | C15  | C20  | 1.486(6)   |
| N2   | C13  | 1.382(5) | C16  | H16a | 1.0702(18) |
| C1   | H1a  | 1.04(3)  | C16  | H16b | 1.0702(18) |
| C1   | H1b  | 1.04(3)  | C18  | H18a | 1.098(9)   |
| C1   | C2   | 1.489(6) | C18  | H18b | 1.097(9)   |
| C2   | C3   | 1.402(6) | C18  | C19  | 1.522(7)   |
| C2   | C5   | 1.383(6) | C20  | C21  | 1.386(6)   |
| C3   | C4   | 1.469(6) | C20  | C25  | 1.405(6)   |
| C3   | C8   | 1.405(6) | C21  | H21  | 1.0780     |
| C5   | H5   | 1.06(5)  | C21  | C22  | 1.399(6)   |
| C5   | C6   | 1.405(6) | C22  | H22  | 1.0780     |
| C6   | C7   | 1.407(6) | C22  | C23  | 1.403(6)   |
| C6   | C14  | 1.494(6) | C23  | C24  | 1.394(7)   |
| C7   | H7   | 1.0780   | C24  | H24  | 1.0780     |
| C7   | C8   | 1.393(6) | C24  | C25  | 1.391(6)   |
| C8   | H8   | 1.0780   | C25  | H25  | 1.0780     |

**Table 4:** Bond Angles in ° for WT-05-553.

| Atom | Atom | Atom | Angle/°  | Atom | Atom | Atom | Angle/°  |
|------|------|------|----------|------|------|------|----------|
| C18  | O4   | C17  | 118.1(3) | C5   | C2   | C3   | 120.9(4) |
| C4   | N1   | C1   | 113.3(4) | C4   | C3   | C2   | 109.2(4) |
| C9   | N1   | C1   | 122.3(4) | C8   | C3   | C2   | 121.8(4) |
| C9   | N1   | C4   | 124.1(4) | C8   | C3   | C4   | 129.0(4) |
| C12  | N2   | H2   | 117(3)   | N1   | C4   | O1   | 124.4(4) |
| C13  | N2   | H2   | 115(3)   | C3   | C4   | O1   | 129.3(4) |
| C13  | N2   | C12  | 127.5(4) | C3   | C4   | N1   | 106.3(4) |
| H1a  | C1   | N1   | 111.2(2) | H5   | C5   | C2   | 120.8(3) |
| H1b  | C1   | N1   | 111.2(2) | C6   | C5   | C2   | 118.4(4) |
| H1b  | C1   | H1a  | 109.1    | C6   | C5   | H5   | 120.8(3) |
| C2   | C1   | N1   | 102.7(4) | C7   | C6   | C5   | 120.1(4) |
| C2   | C1   | H1a  | 111.2(2) | C14  | C6   | C5   | 121.1(4) |
| C2   | C1   | H1b  | 111.2(2) | C14  | C6   | C7   | 118.4(4) |
| C3   | C2   | C1   | 108.4(4) | H7   | C7   | C6   | 119.0(3) |
| C5   | C2   | C1   | 130.7(4) | C8   | C7   | C6   | 122.0(4) |

| Atom | Atom | Atom | Angle/°           | Atom | Atom | Atom | Angle/°   |
|------|------|------|-------------------|------|------|------|-----------|
| C8   | C7   | H7   | 119.0(3)          | C20  | C15  | C17  | 116.0(4)  |
| C7   | C8   | C3   | 116.7(4)          | C15  | C16  | C14  | 62.1(3)   |
| H8   | C8   | C3   | 121.6(3)          | H16a | C16  | C14  | 117.6(2)  |
| H8   | C8   | C7   | 121.6(3)          | H16a | C16  | C15  | 117.6(2)  |
| H9   | C9   | N1   | 107.5(2)          | H16b | C16  | C14  | 117.6(2)  |
| C10  | C9   | N1   | 114.4(4)          | H16b | C16  | C15  | 117.6(2)  |
| C10  | C9   | H9   | 107.5(3)          | H16b | C16  | H16a | 114.7     |
| C13  | C9   | N1   | 108.9(4)          | O5   | C17  | O4   | 123.6(4)  |
| C13  | C9   | H9   | 107.5(2)          | C15  | C17  | O4   | 112.0(4)  |
| C13  | C9   | C10  | 110.7(4)          | C15  | C17  | O5   | 124.4(4)  |
| H10a | C10  | C9   | 109.8(3)          | H18a | C18  | O4   | 105(2)    |
| H10b | C10  | C9   | 109.8(3)          | H18b | C18  | O4   | 113(2)    |
| H10b | C10  | H10a | 108.3             | H18b | C18  | H18a | 107.6(11) |
| C11  | C10  | C9   | 109.2(4)          | C19  | C18  | O4   | 108.3(4)  |
| C11  | C10  | H10a | 109.8(3)          | C19  | C18  | H18a | 111(2)    |
| C11  | C10  | H10b | 109.8(3)          | C19  | C18  | H18b | 111(2)    |
| H11a | C11  | C10  | 109.2(3)          | Cl1  | C19  | Cl3  | 108.7(3)  |
| H11b | C11  | C10  | 109.2(3)          | Cl2  | C19  | Cl3  | 107.7(3)  |
| H11b | C11  | H11a | 107.892608686(15) | Cl2  | C19  | Cl1  | 110.7(3)  |
| C12  | C11  | C10  | 112.1(4)          | C18  | C19  | Cl3  | 111.4(3)  |
| C12  | C11  | H11a | 109.2(3)          | C18  | C19  | Cl1  | 107.3(3)  |
| C12  | C11  | H11b | 109.2(3)          | C18  | C19  | Cl2  | 110.9(4)  |
| N2   | C12  | O2   | 119.5(4)          | C21  | C20  | C15  | 121.3(4)  |
| C11  | C12  | O2   | 124.0(4)          | C25  | C20  | C15  | 120.0(4)  |
| C11  | C12  | N2   | 116.6(4)          | C25  | C20  | C21  | 118.6(4)  |
| N2   | C13  | O3   | 121.1(4)          | H21  | C21  | C20  | 119.1(2)  |
| C9   | C13  | O3   | 122.7(4)          | C22  | C21  | C20  | 121.7(4)  |
| C9   | C13  | N2   | 116.2(4)          | C22  | C21  | H21  | 119.1(3)  |
| H14  | C14  | C6   | 115(2)            | H22  | C22  | C21  | 120.8(3)  |
| C15  | C14  | C6   | 123.3(4)          | C23  | C22  | C21  | 118.4(4)  |
| C15  | C14  | H14  | 111(2)            | C23  | C22  | H22  | 120.8(3)  |
| C16  | C14  | C6   | 123.4(4)          | C22  | C23  | Br1  | 120.2(4)  |
| C16  | C14  | H14  | 114(2)            | C24  | C23  | Br1  | 118.8(3)  |
| C16  | C14  | C15  | 59.8(3)           | C24  | C23  | C22  | 121.0(4)  |
| C16  | C15  | C14  | 58.2(3)           | H24  | C24  | C23  | 120.4(3)  |
| C17  | C15  | C14  | 111.3(3)          | C25  | C24  | C23  | 119.1(4)  |
| C17  | C15  | C16  | 114.0(4)          | C25  | C24  | H24  | 120.4(3)  |
| C20  | C15  | C14  | 124.4(4)          | C24  | C25  | C20  | 121.1(4)  |
| C20  | C15  | C16  | 120.6(4)          | H25  | C25  | C20  | 119.4(3)  |
|      |      |      |                   | H25  | C25  | C24  | 119.4(3)  |

**Table 5:** Torsion Angles in ° for WT-05-553.

| Atom | Atom | Atom | Atom | Angle/°   |
|------|------|------|------|-----------|
| Br1  | C23  | C22  | C21  | -179.9(3) |
| Br1  | C23  | C24  | C25  | 179.5(3)  |
| Cl3  | C19  | C18  | O4   | 58.1(3)   |
| Cl1  | C19  | C18  | O4   | 177.0(3)  |
| Cl2  | C19  | C18  | O4   | -61.9(3)  |
| O1   | C4   | N1   | C1   | 179.6(4)  |
| O1   | C4   | N1   | C9   | -7.4(5)   |
| O1   | C4   | C3   | C2   | 177.0(5)  |
| O1   | C4   | C3   | C8   | -4.6(6)   |

| Atom | Atom | Atom | Atom | Angle/°   |
|------|------|------|------|-----------|
| O2   | C12  | N2   | C13  | -176.8(4) |
| O2   | C12  | C11  | C10  | 150.3(5)  |
| O3   | C13  | N2   | C12  | 176.1(4)  |
| O3   | C13  | C9   | N1   | -22.4(5)  |
| O3   | C13  | C9   | C10  | -148.9(5) |
| O4   | C17  | C15  | C14  | 148.0(4)  |
| O4   | C17  | C15  | C16  | -148.5(4) |
| O4   | C17  | C15  | C20  | -1.7(4)   |
| O5   | C17  | C15  | C14  | -32.1(5)  |
| O5   | C17  | C15  | C16  | 31.4(5)   |
| O5   | C17  | C15  | C20  | 178.2(5)  |
| N1   | C1   | C2   | C3   | -4.8(4)   |
| N1   | C1   | C2   | C5   | 179.0(3)  |
| N1   | C4   | C3   | C2   | -1.5(4)   |
| N1   | C4   | C3   | C8   | 176.9(3)  |
| N1   | C9   | C10  | C11  | -179.9(4) |
| N1   | C9   | C13  | N2   | 157.8(3)  |
| N2   | C12  | C11  | C10  | -29.4(5)  |
| N2   | C13  | C9   | C10  | 31.2(4)   |
| C1   | C2   | C3   | C4   | 4.0(4)    |
| C1   | C2   | C3   | C8   | -174.5(3) |
| C1   | C2   | C5   | C6   | 174.7(5)  |
| C2   | C3   | C8   | C7   | -0.9(5)   |
| C2   | C5   | C6   | C7   | -1.1(5)   |
| C2   | C5   | C6   | C14  | -174.3(4) |
| C3   | C8   | C7   | C6   | -1.4(5)   |
| C5   | C6   | C7   | C8   | 2.4(5)    |
| C5   | C6   | C14  | C15  | -95.8(4)  |
| C5   | C6   | C14  | C16  | -22.6(5)  |
| C6   | C14  | C15  | C16  | 112.3(6)  |
| C6   | C14  | C15  | C17  | -141.9(5) |
| C6   | C14  | C15  | C20  | 4.8(6)    |
| C6   | C14  | C16  | C15  | -112.2(6) |
| C9   | C10  | C11  | C12  | 55.9(4)   |
| C14  | C15  | C20  | C21  | -77.5(5)  |
| C14  | C15  | C20  | C25  | 107.2(5)  |
| C14  | C16  | C15  | C17  | -101.0(3) |
| C14  | C16  | C15  | C20  | 113.9(3)  |
| C15  | C20  | C21  | C22  | -174.5(4) |
| C15  | C20  | C25  | C24  | 174.1(4)  |
| C20  | C21  | C22  | C23  | -0.6(5)   |
| C20  | C25  | C24  | C23  | 1.6(5)    |
| C21  | C22  | C23  | C24  | 0.9(5)    |
| C22  | C23  | C24  | C25  | -1.4(5)   |

**Table 6:** Hydrogen Fractional Atomic Coordinates ( $\times 10^4$ ) and Equivalent Isotropic Displacement Parameters ( $\text{\AA}^2 \times 10^3$ ) for WT-05-553.  $U_{eq}$  is defined as 1/3 of the trace of the orthogonalised  $U_{ij}$ .

| Atom | x         | y        | z        | $U_{eq}$ |
|------|-----------|----------|----------|----------|
| H2   | 10440(80) | 4920(60) | 5720(20) | 16(11)   |
| H1a  | 2539(9)   | 5520(40) | 4738(2)  | 17(3)    |
| H1b  | 1490(40)  | 7135(16) | 4947(8)  | 17(3)    |
| H5   | -380(60)  | 6330(30) | 3709(5)  | 32(13)   |
| H7   | 3374(7)   | 8960(4)  | 2514(2)  | 33(10)   |
| H8   | 6286(7)   | 9189(4)  | 3287(2)  | 33(10)   |
| H9   | 4480(50)  | 6010(30) | 5731(10) | 17(3)    |
| H10a | 7660(40)  | 8590(20) | 5656(8)  | 23(3)    |
| H10b | 5110(50)  | 8610(20) | 5982(4)  | 23(3)    |
| H11a | 8030(20)  | 8240(30) | 6755(10) | 26(3)    |
| H11b | 6150(40)  | 6738(19) | 6720(9)  | 26(3)    |
| H14  | -890(70)  | 8640(20) | 2420(20) | 19(3)    |
| H16a | -2135(7)  | 5640(5)  | 2896(2)  | 20(3)    |
| H16b | -3773(8)  | 6866(4)  | 2452(2)  | 22(3)    |
| H18a | -1610(50) | 6220(30) | 163(17)  | 22(3)    |
| H18b | -1960(50) | 8010(30) | 430(20)  | 22(3)    |
| H21  | 3626(7)   | 6444(5)  | 1700(2)  | 48(13)   |
| H22  | 5997(8)   | 4329(5)  | 1513(2)  | 48(13)   |
| H24  | 929(8)    | 1495(5)  | 2117(2)  | 45(17)   |
| H25  | -1371(8)  | 3629(5)  | 2312(2)  | 70(20)   |

### Citations

CrysAlisPro (ROD), Rigaku Oxford Diffraction, Poland (?).

CrysAlisPro Software System, Rigaku Oxford Diffraction, (2024).

L.J. Bourhis and O.V. Dolomanov and R.J. Gildea and J.A.K. Howard and H. Puschmann, The Anatomy of a Comprehensive Constrained, Restrained, Refinement Program for the Modern Computing Environment - Olex2 Disected, *Acta Cryst. A*, (2015), **A71**, 59-71.

O.V. Dolomanov and L.J. Bourhis and R.J. Gildea and J.A.K. Howard and H. Puschmann, Olex2: A complete structure solution, refinement and analysis program, *J. Appl. Cryst.*, (2009), **42**, 339-341.

Sheldrick, G.M., ShelXT-Integrated space-group and crystal-structure determination, *Acta Cryst.*, (2015), **A71**, 3-8.

## Section 4: Spectroscopic Data

### <sup>1</sup>H NMR Spectra

#### <sup>1</sup>H NMR Spectrum for Compound B

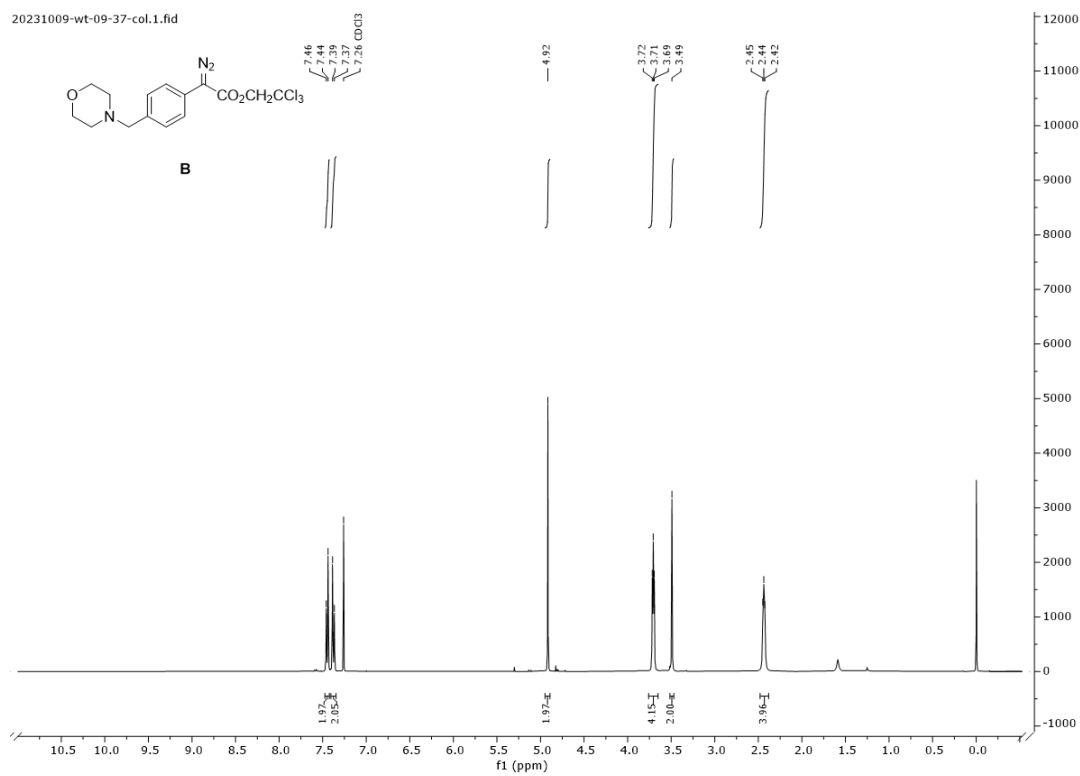

### <sup>1</sup>H NMR Spectrum for Compounds 13a and 13b

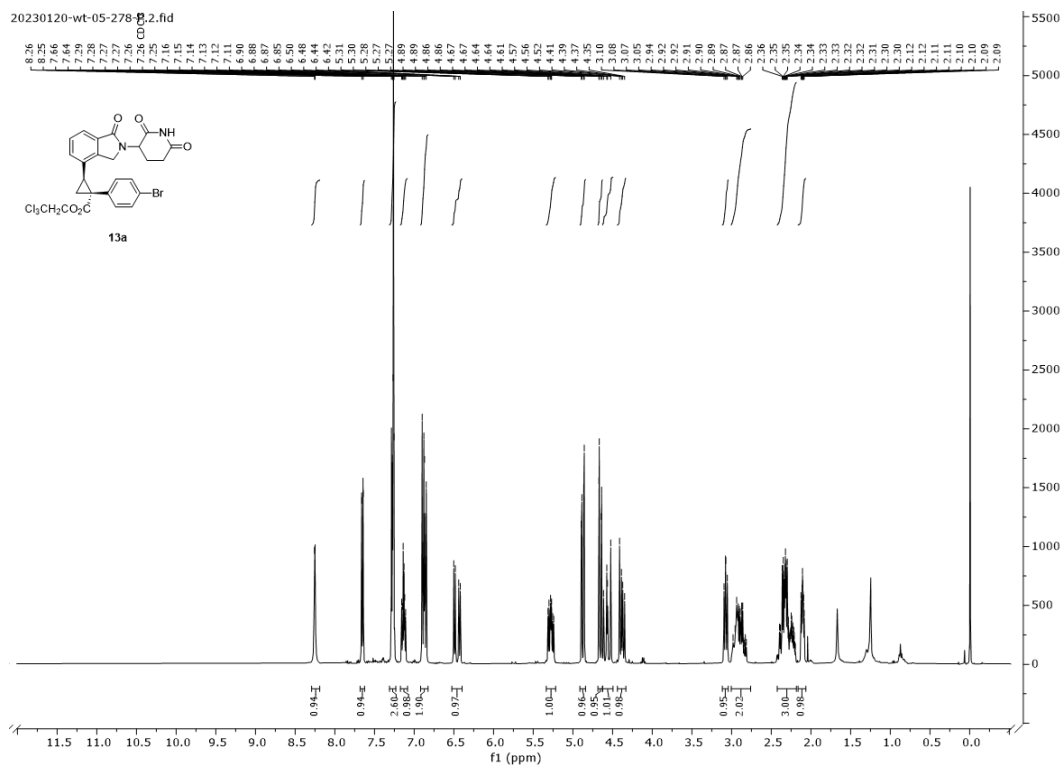

### <sup>1</sup>H NMR Spectrum for Compounds 14a and 14b

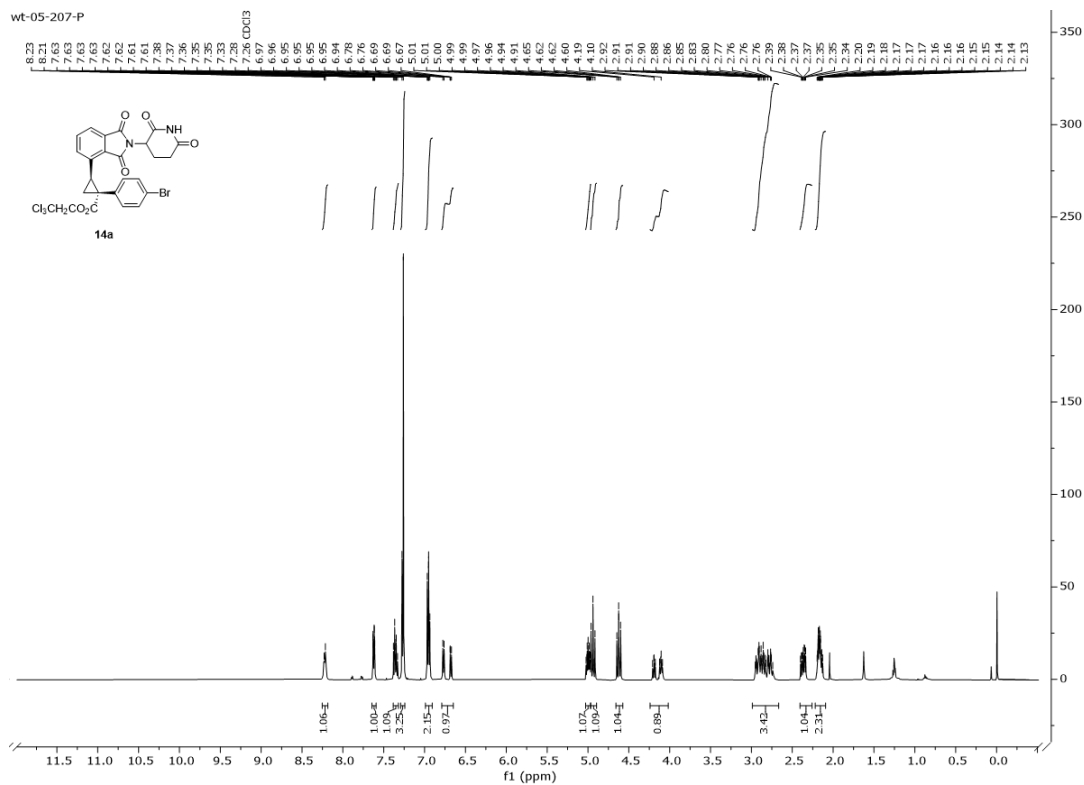

# <sup>1</sup>H NMR Spectrum for Compounds 15a and 15b

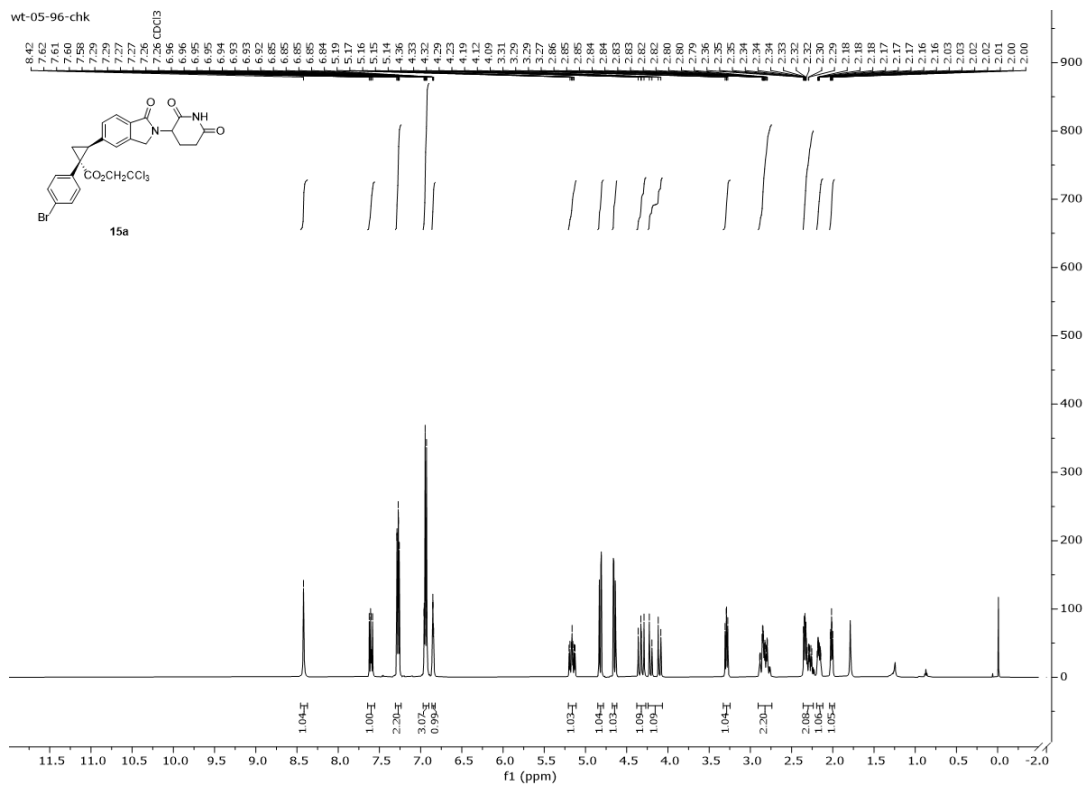

# <sup>1</sup>H NMR Spectrum for Compounds S-15a and R-15b





### <sup>1</sup>H NMR Spectrum for Compounds 16a and 16b

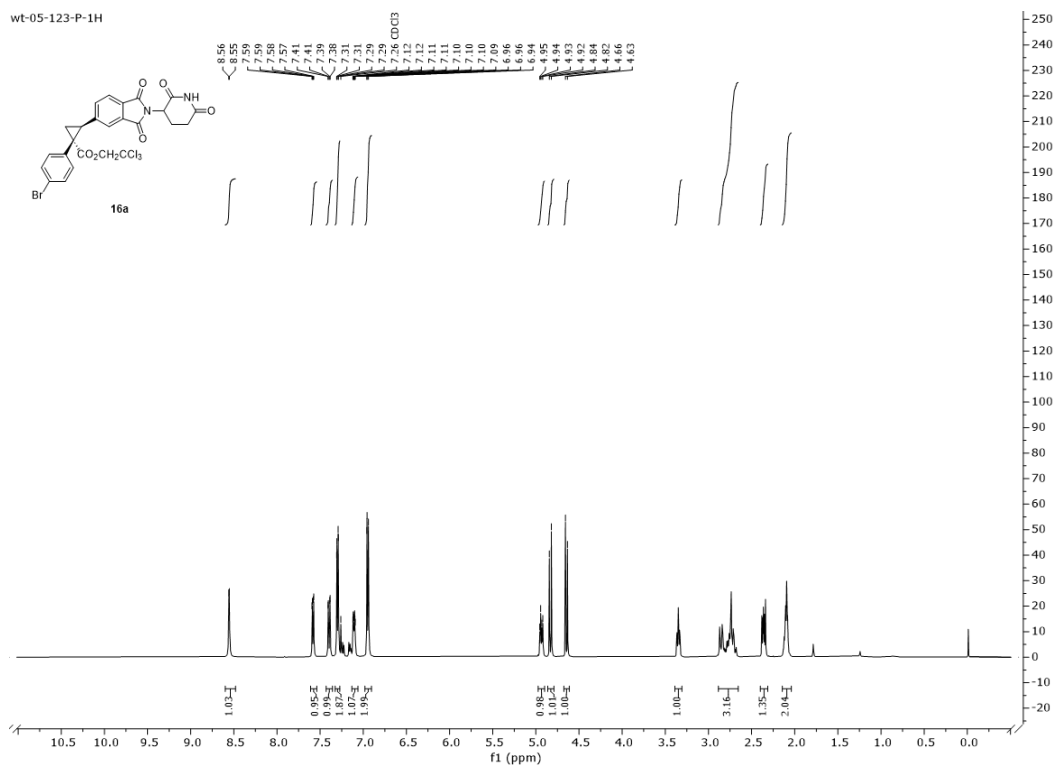

### <sup>1</sup>H NMR Spectrum for Compounds 17a and 17b

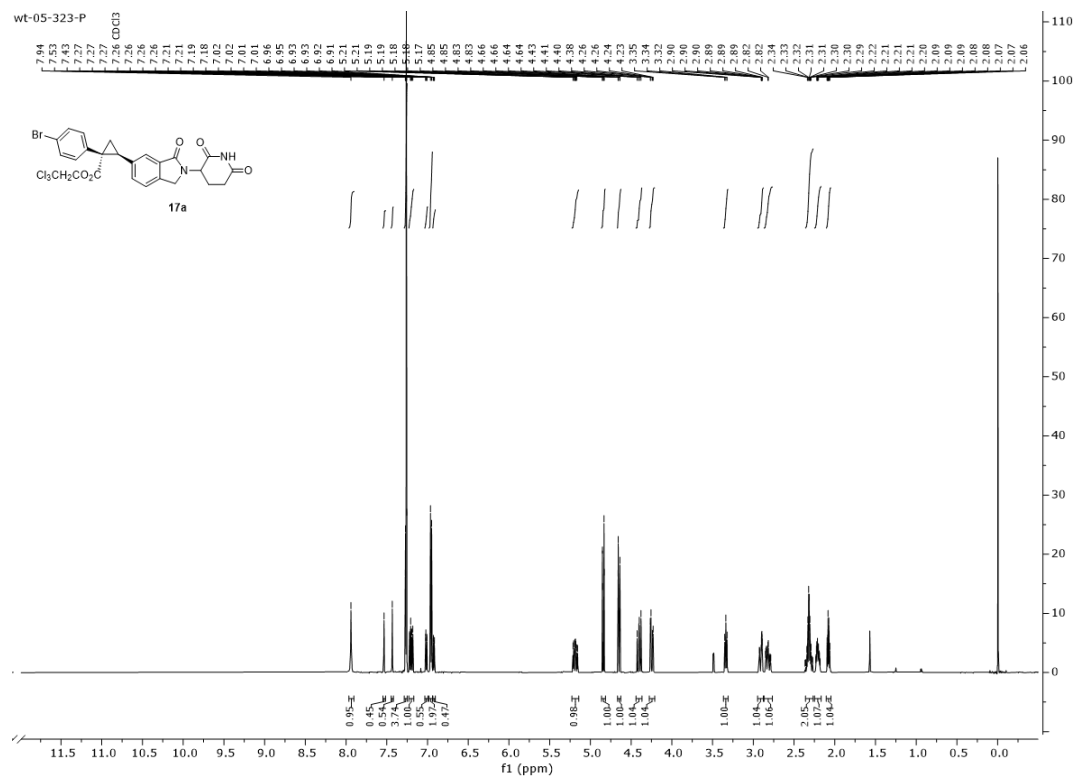

### <sup>1</sup>H NMR Spectrum for Compounds 18a and 18b

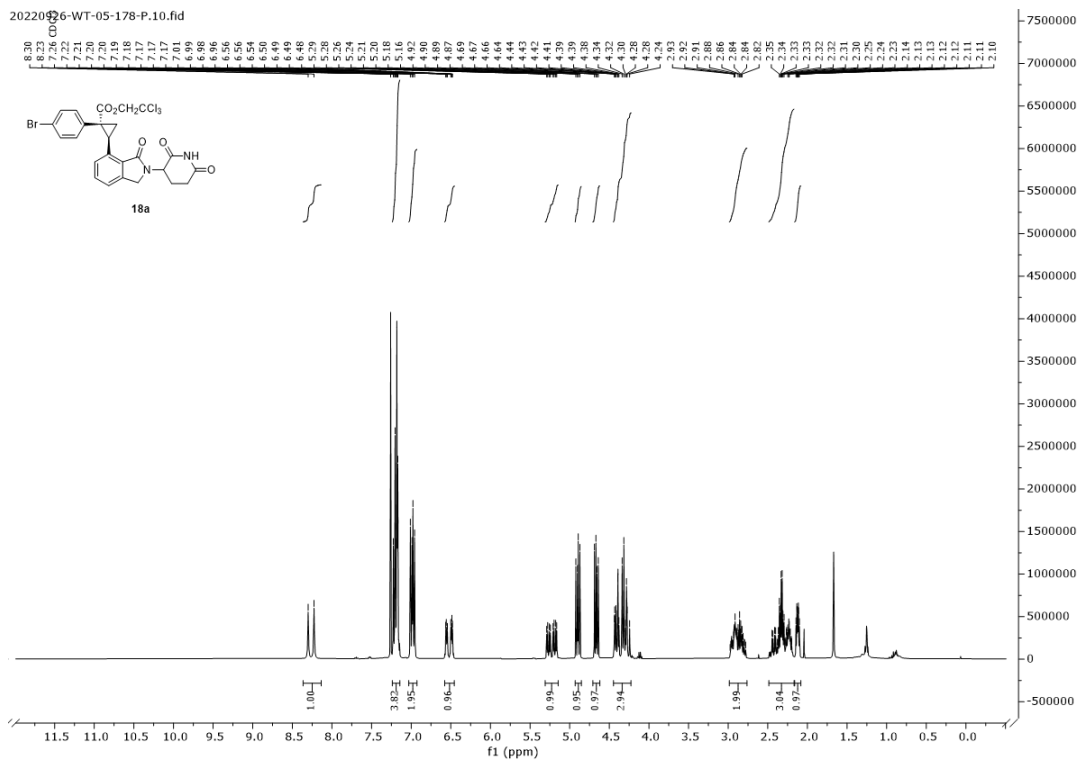

### <sup>1</sup>H NMR Spectrum for Compounds 19a and 19b

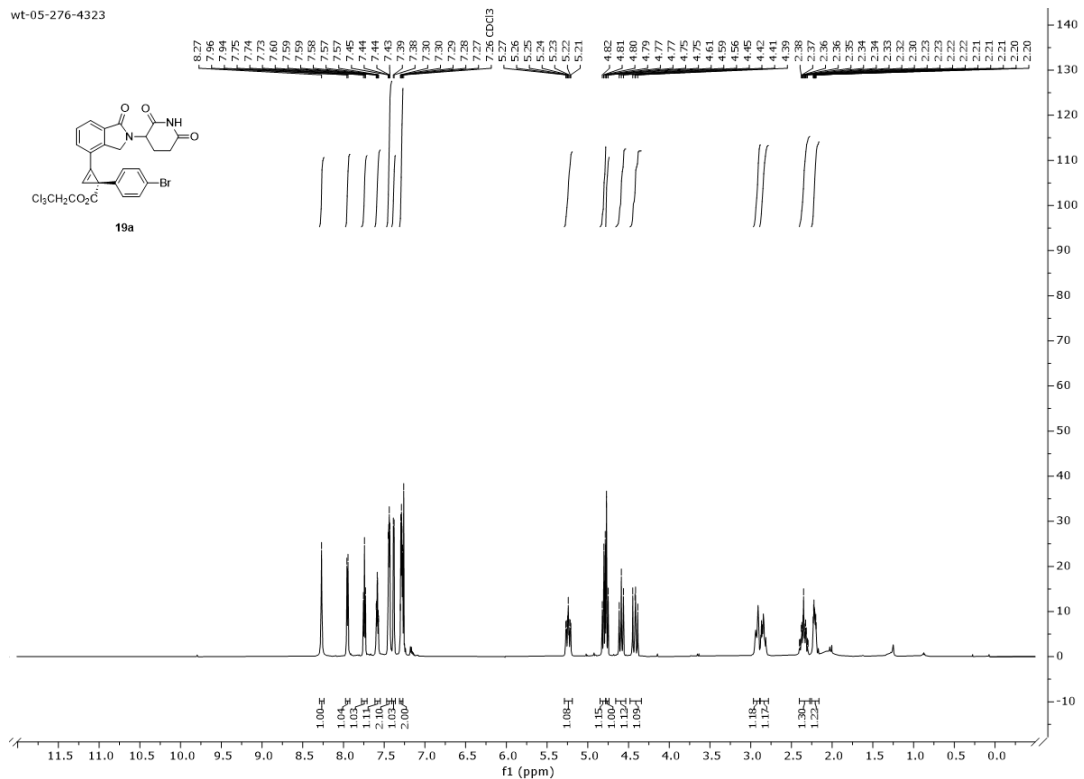

### <sup>1</sup>H NMR Spectrum for Compounds 20a and 20b

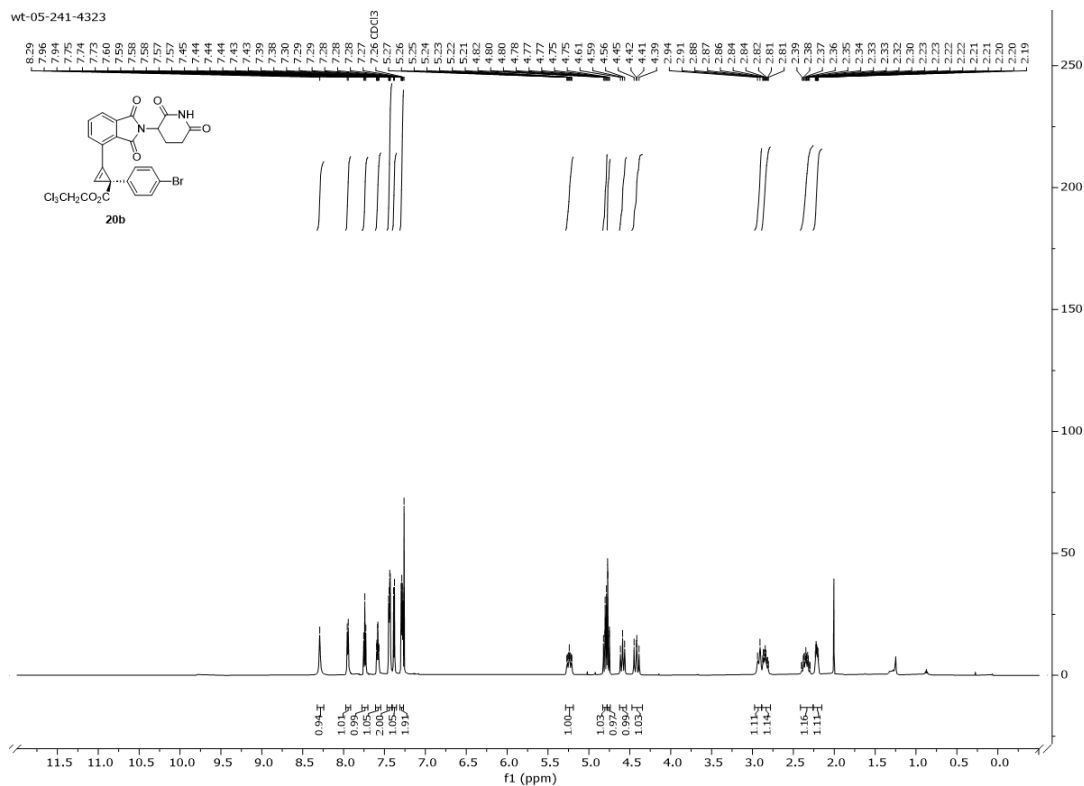

### <sup>1</sup>H NMR Spectrum for Compounds 21a and 21b

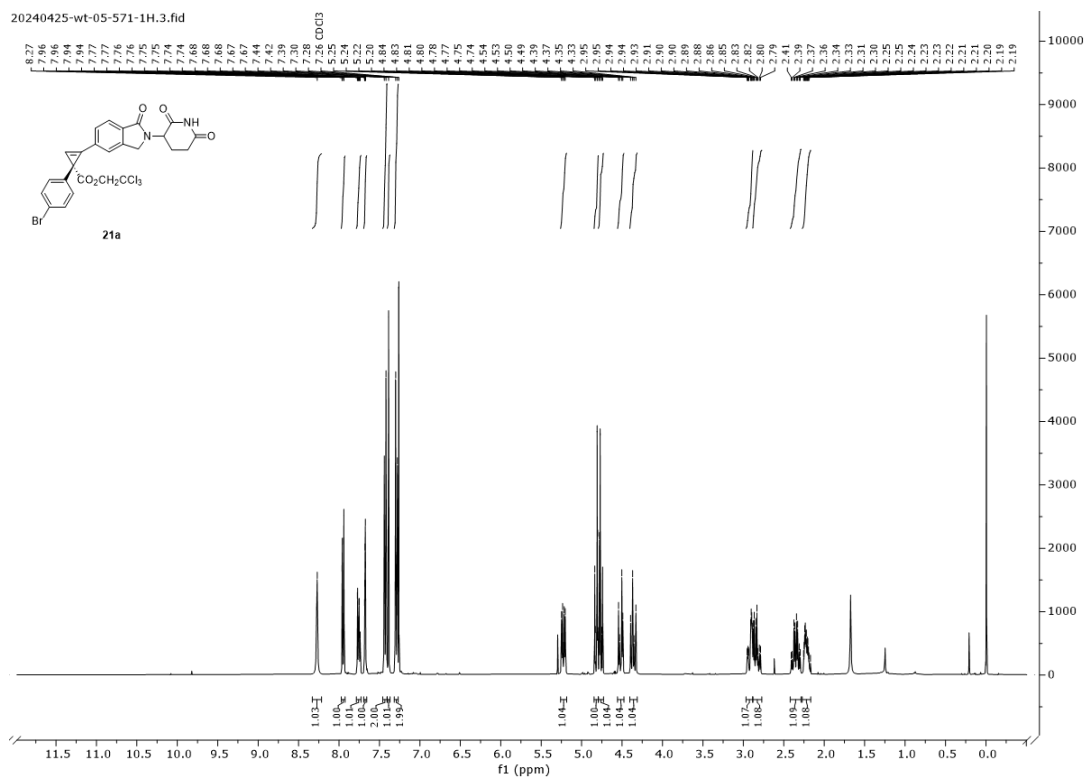

### <sup>1</sup>H NMR Spectrum for Compounds 22a and 22b

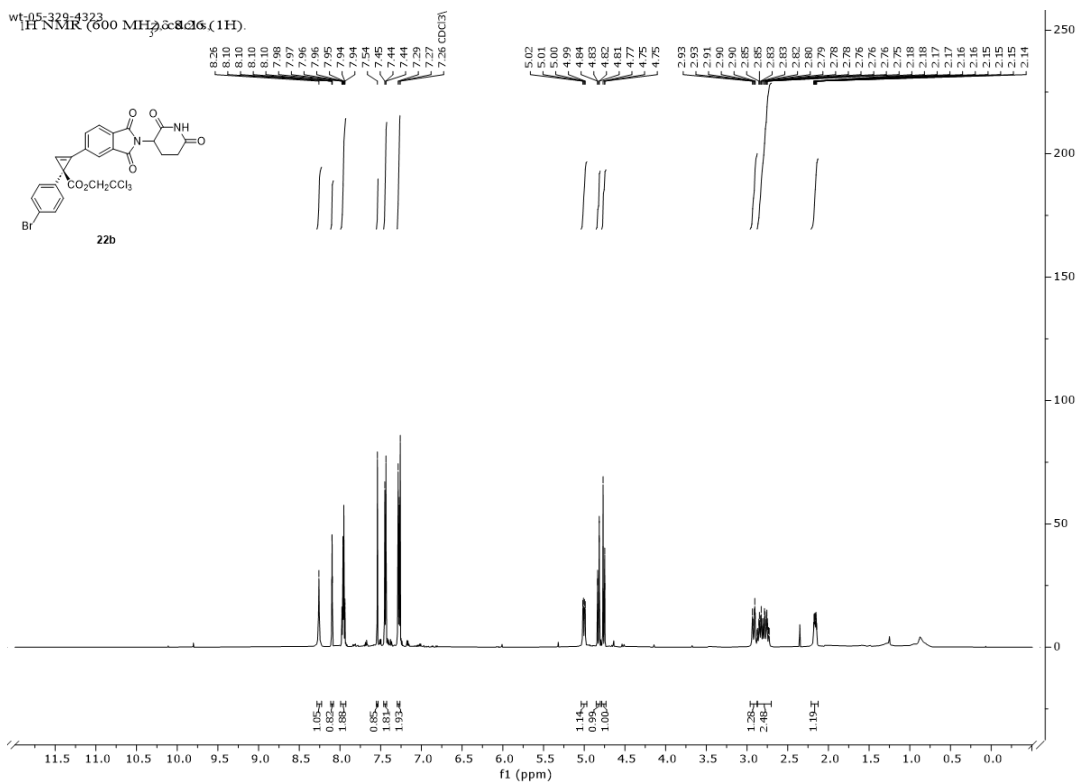

### <sup>1</sup>H NMR Spectrum for Compounds 23a and 23b

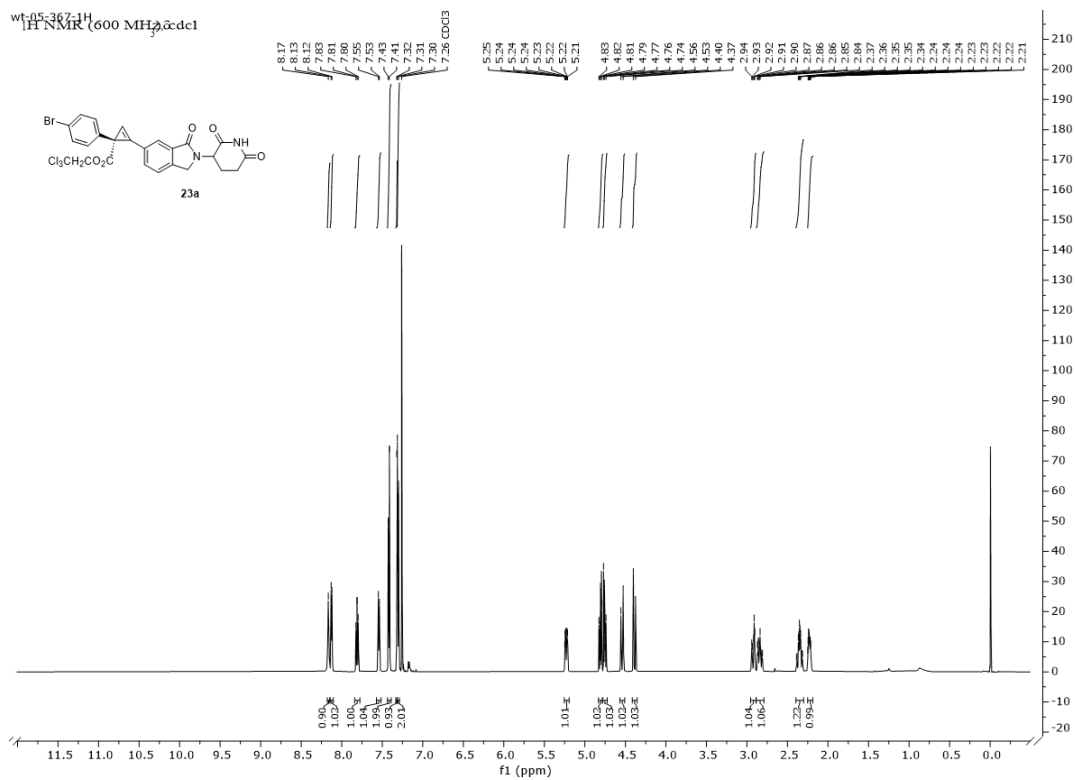

# <sup>1</sup>H NMR Spectrum for Compounds 24a and 24b

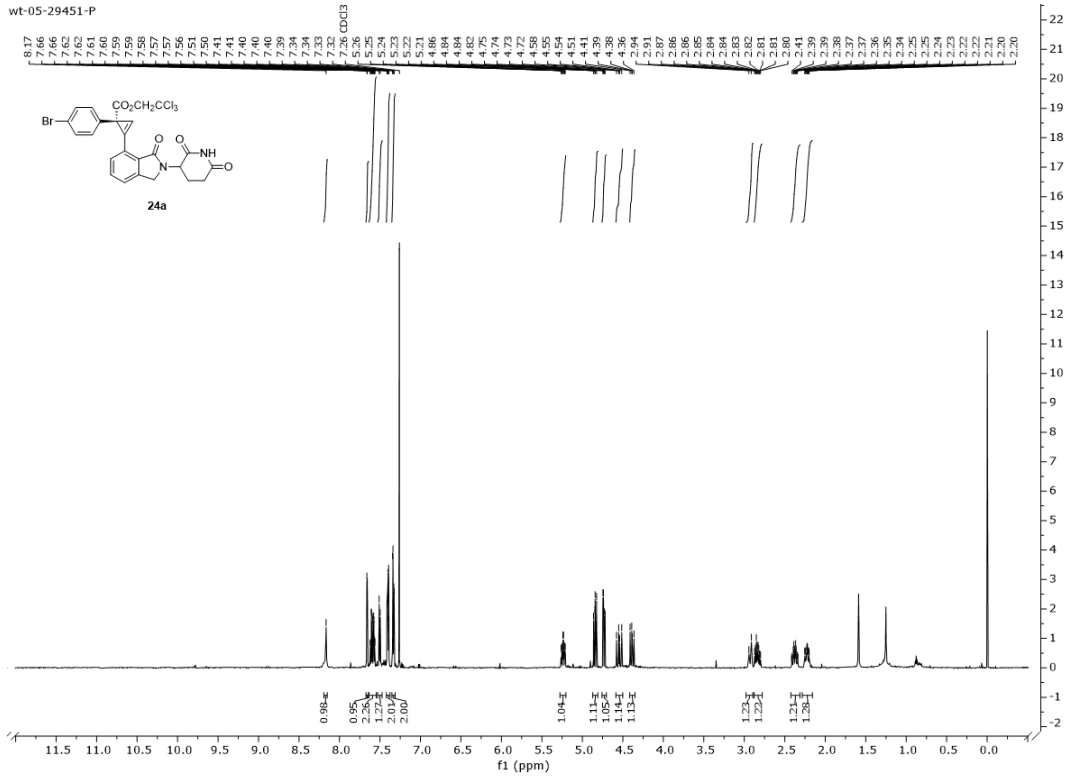

# <sup>1</sup>H NMR Spectrum for Compounds 25a and 25b

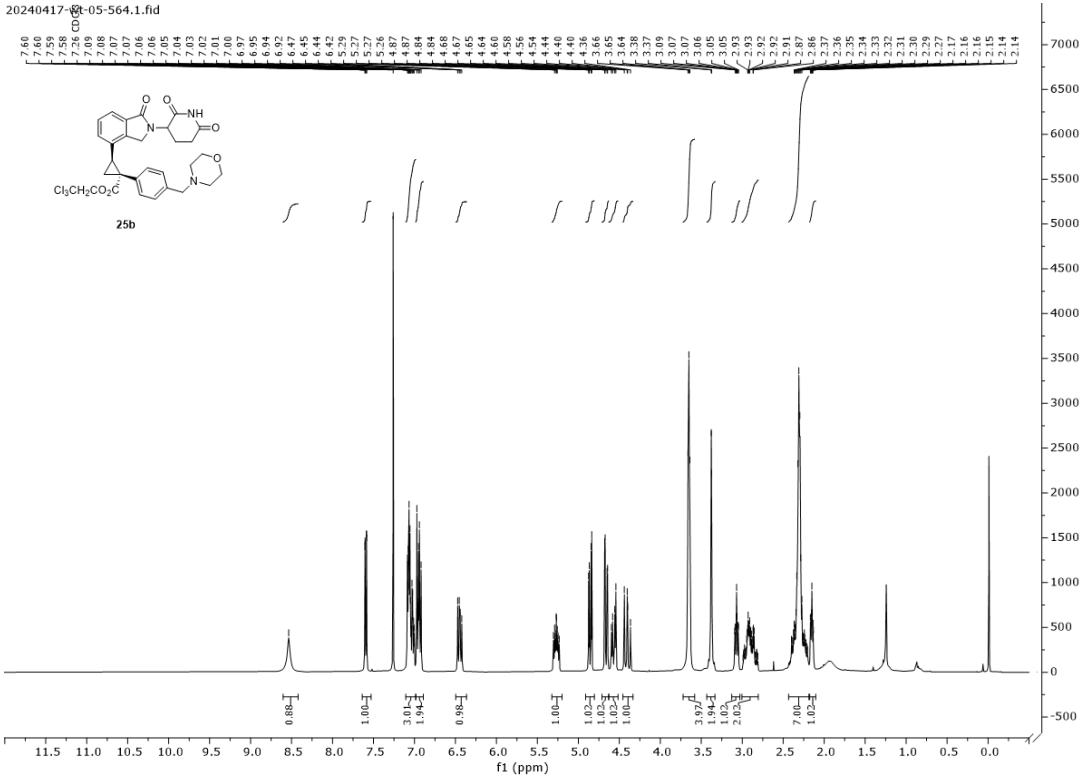

### <sup>1</sup>H NMR Spectrum for Compounds 26a and 26b

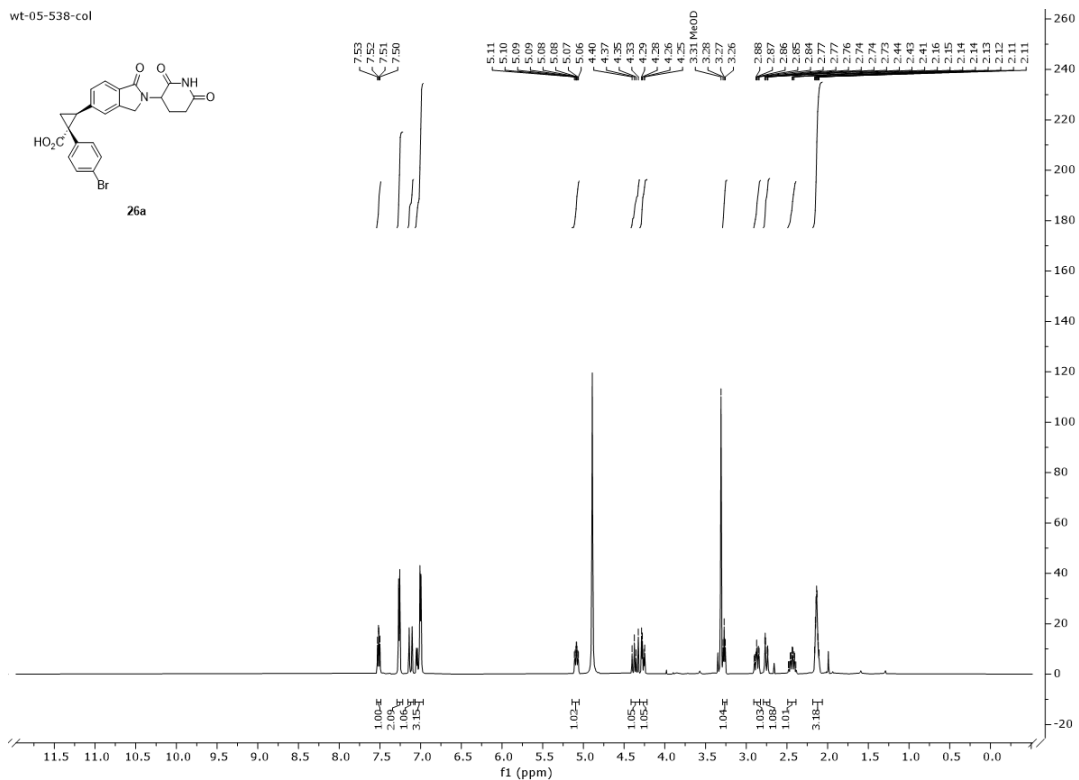

### <sup>1</sup>H NMR Spectrum for Compounds 27a and 27b

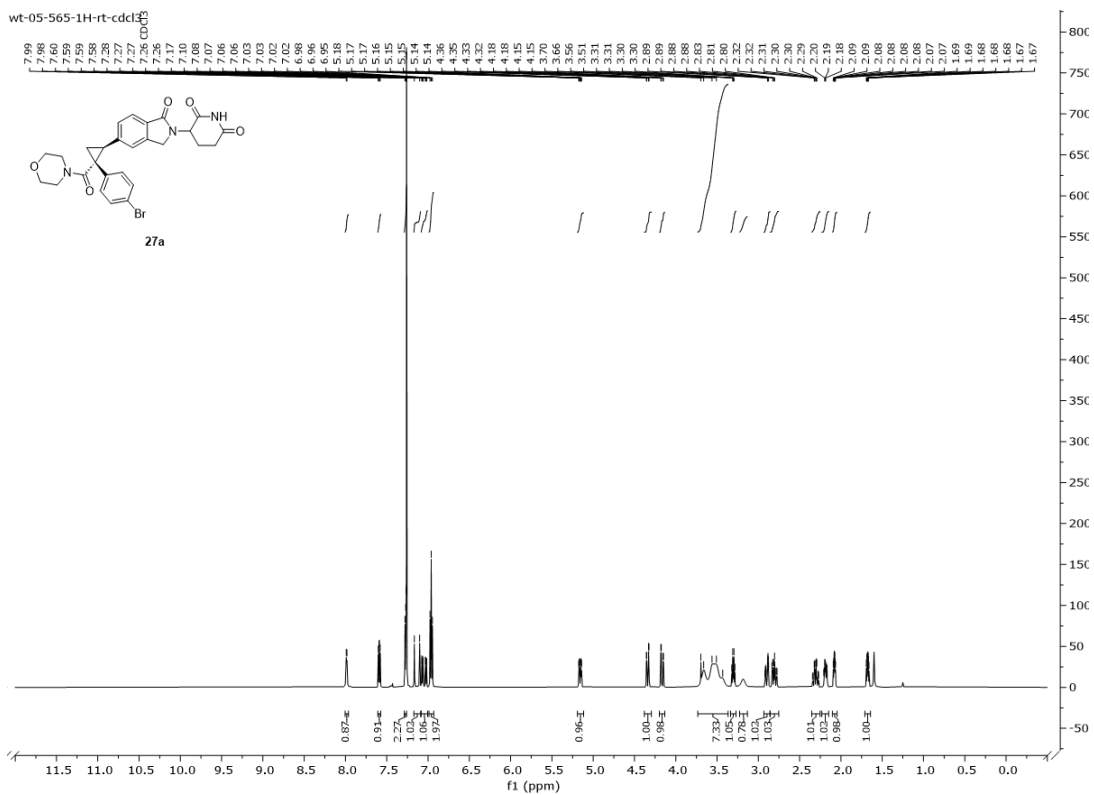

# $^{13}\text{C}\{^1\text{H}\}$ NMR Spectra

## $^{13}\text{C}\{^1\text{H}\}$ NMR Spectrum for Compounds 13a and 13b.

wt-05-95-13C

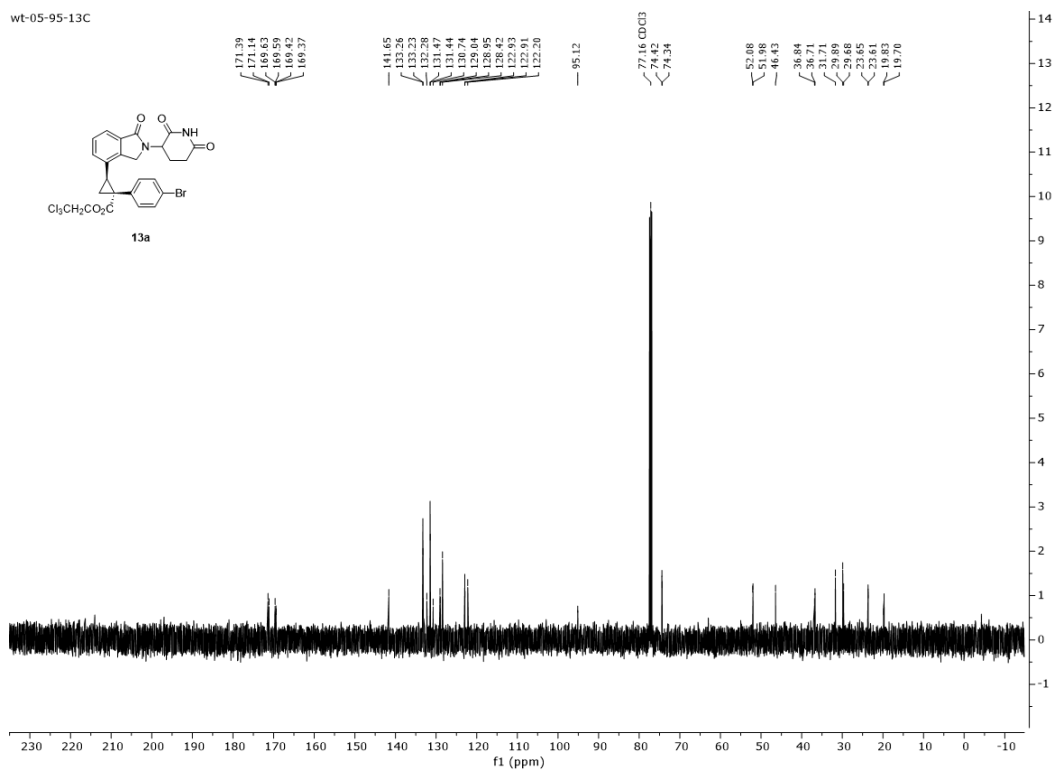



### $^{13}\text{C}\{^1\text{H}\}$ NMR Spectrum for Compounds 14a and 14b.

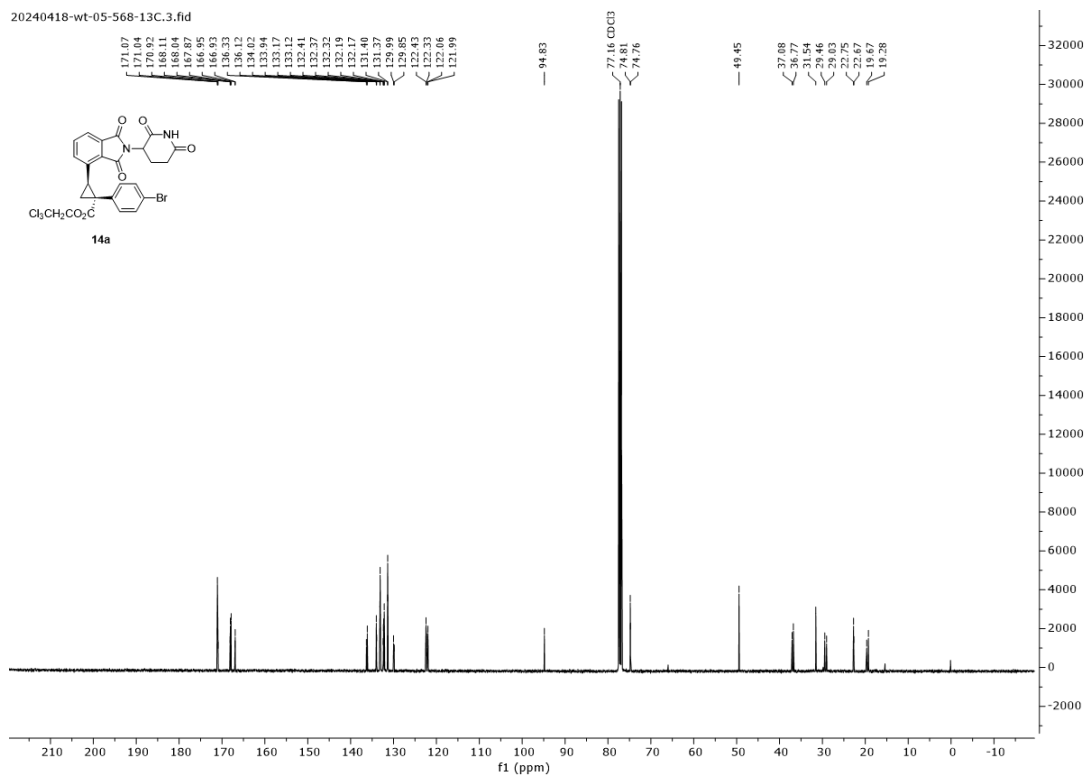

### $^{13}\text{C}\{^1\text{H}\}$ NMR Spectrum for Compounds 15a and 15b.

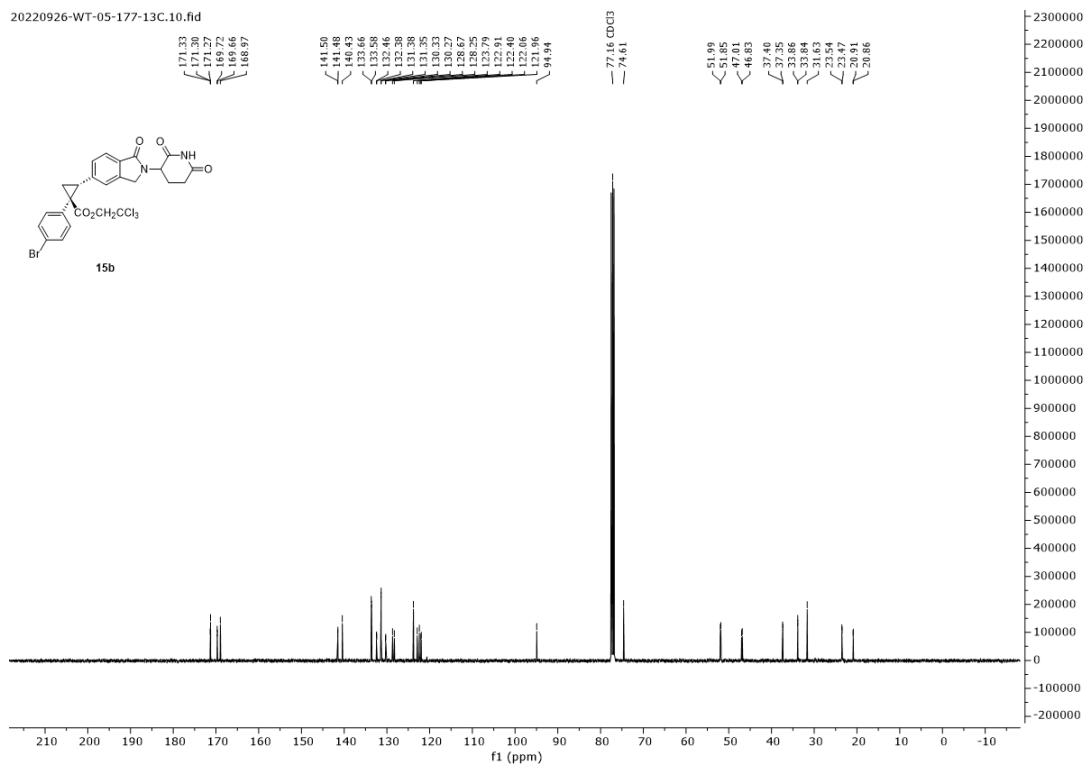

### $^{13}\text{C}\{^1\text{H}\}$ NMR Spectrum for Compounds *S*-15a and *R*-15b.

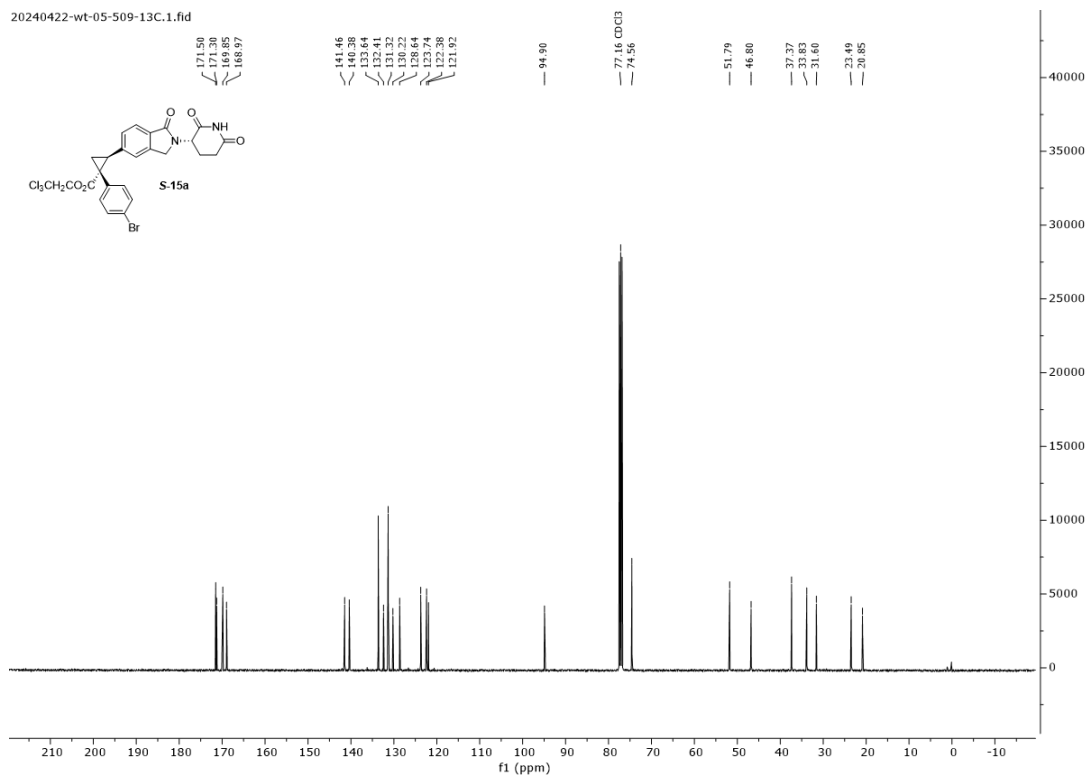

### $^{13}\text{C}\{^1\text{H}\}$ NMR Spectrum for Compounds *R*-15a and *S*-15b.

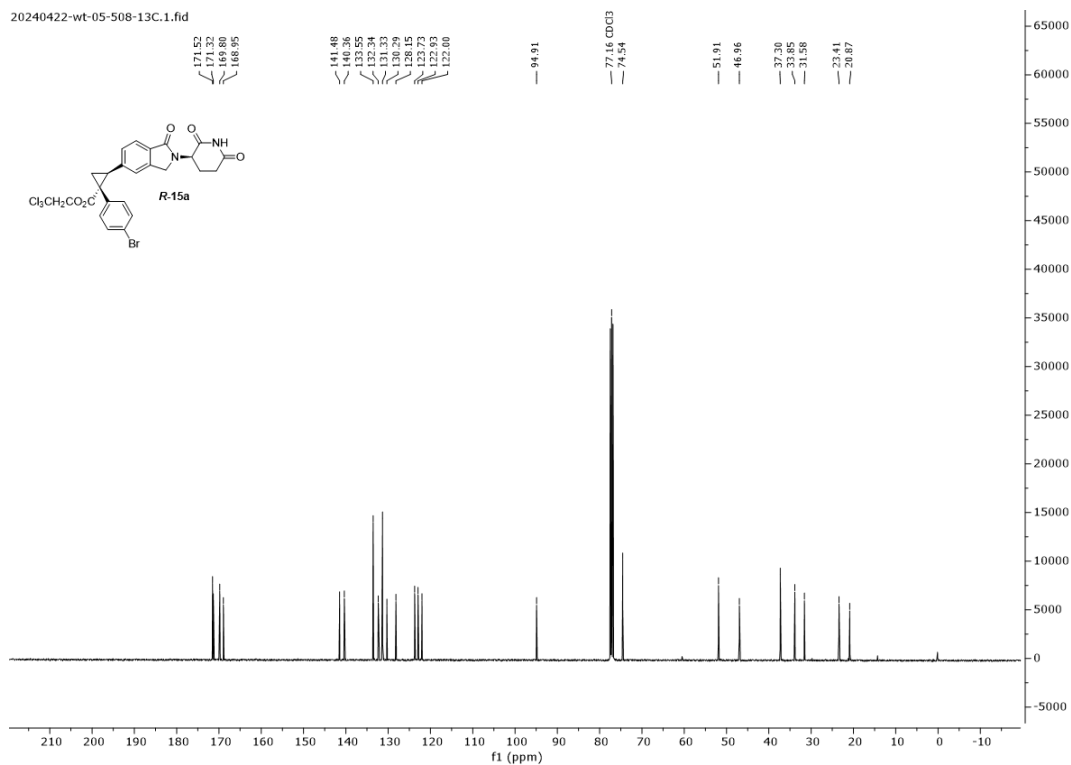

### $^{13}\text{C}\{^1\text{H}\}$ NMR Spectrum for Compounds 16a and 16b.

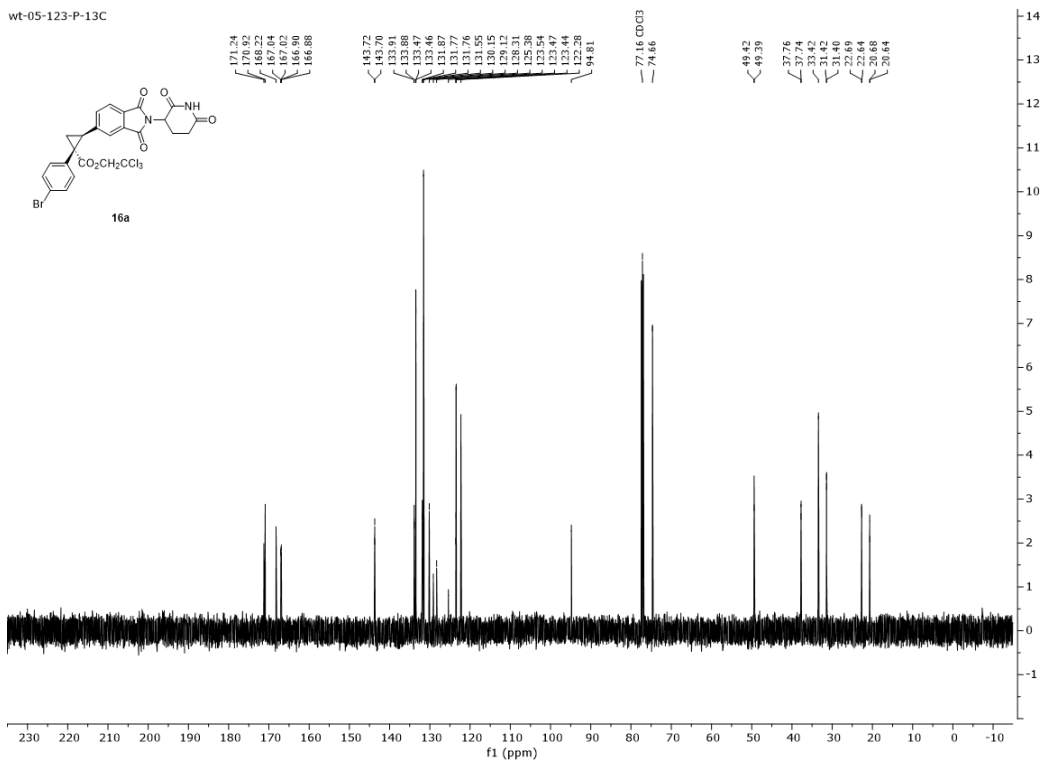

### $^{13}\text{C}\{^1\text{H}\}$ NMR Spectrum for Compounds 17a and 17b.

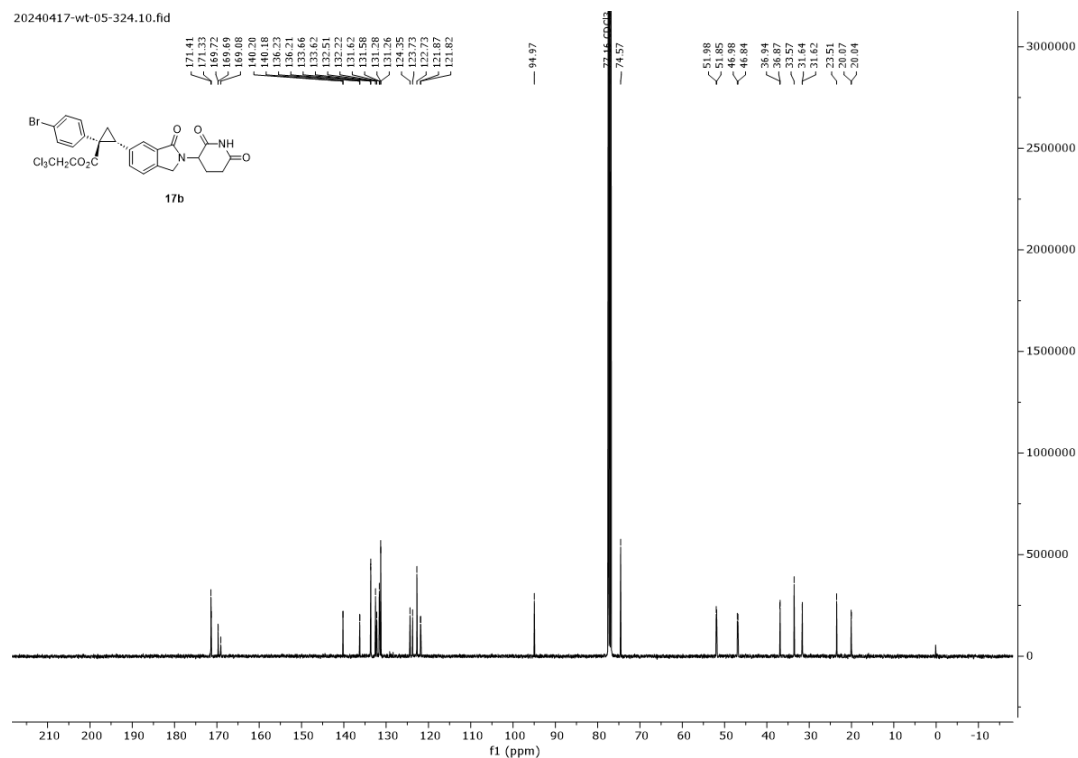

### $^{13}\text{C}\{^1\text{H}\}$ NMR Spectrum for Compounds 18a and 18b.

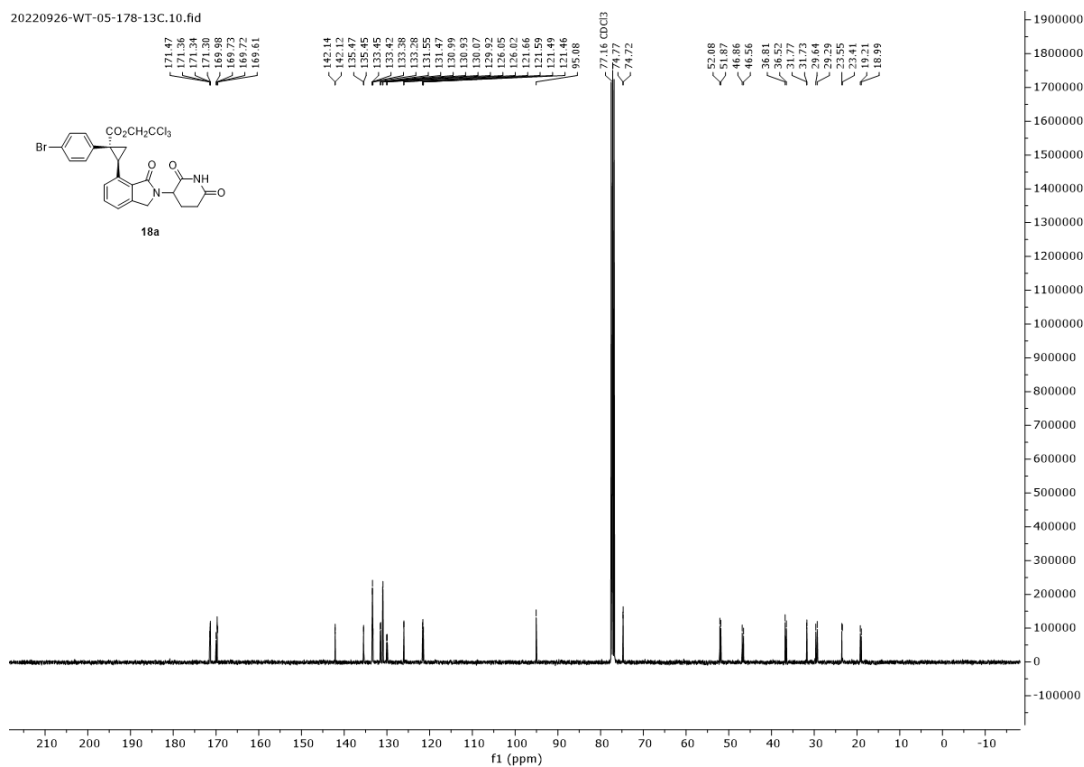

### $^{13}\text{C}\{^1\text{H}\}$ NMR Spectrum for Compounds 19a and 19b.

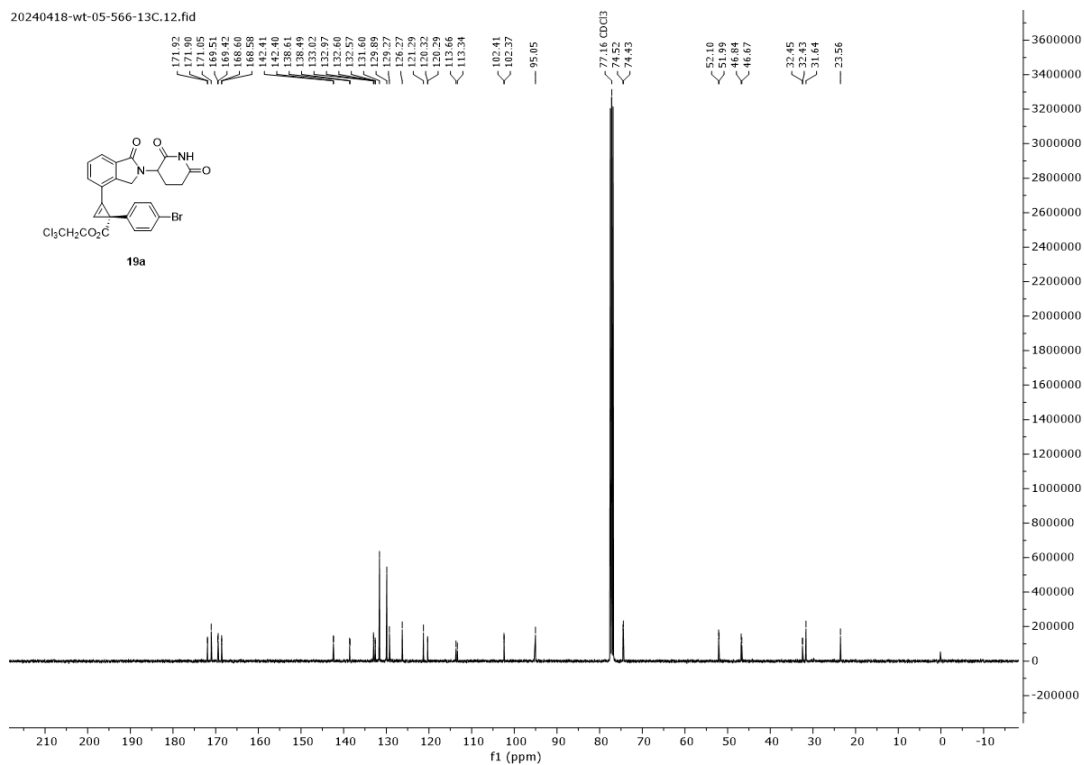

### $^{13}\text{C}\{^1\text{H}\}$ NMR Spectrum for Compounds 20a and 20b.

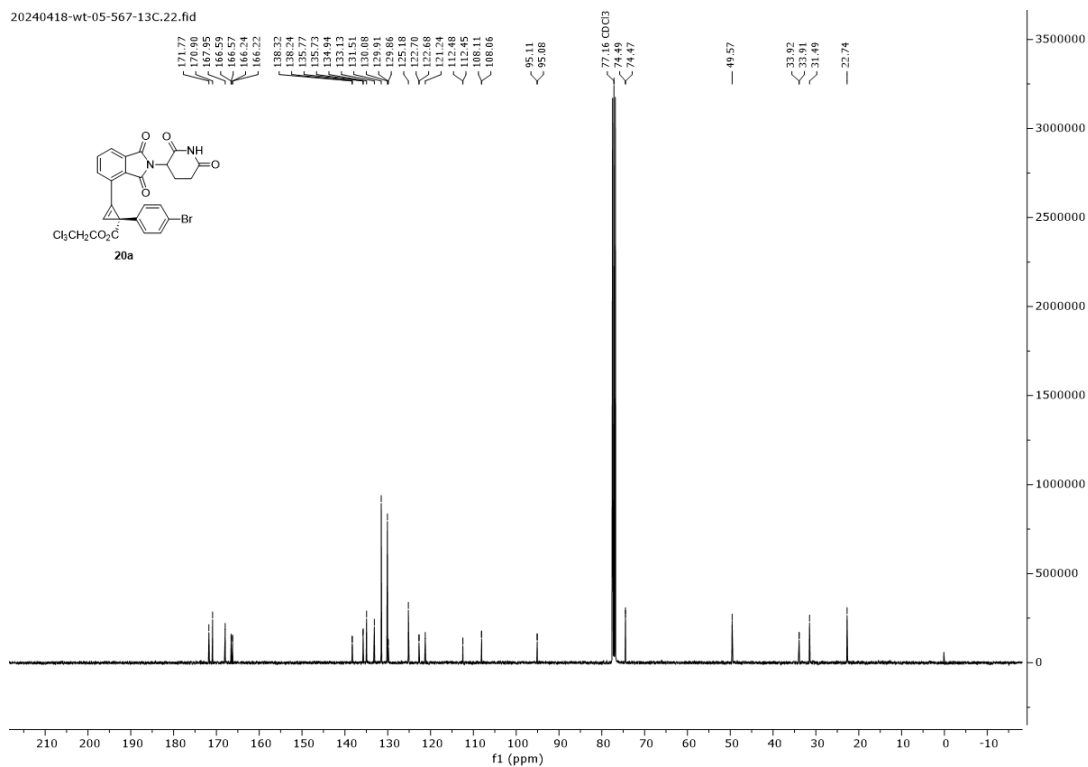

### $^{13}\text{C}\{^1\text{H}\}$ NMR Spectrum for Compounds 21a and 21b.

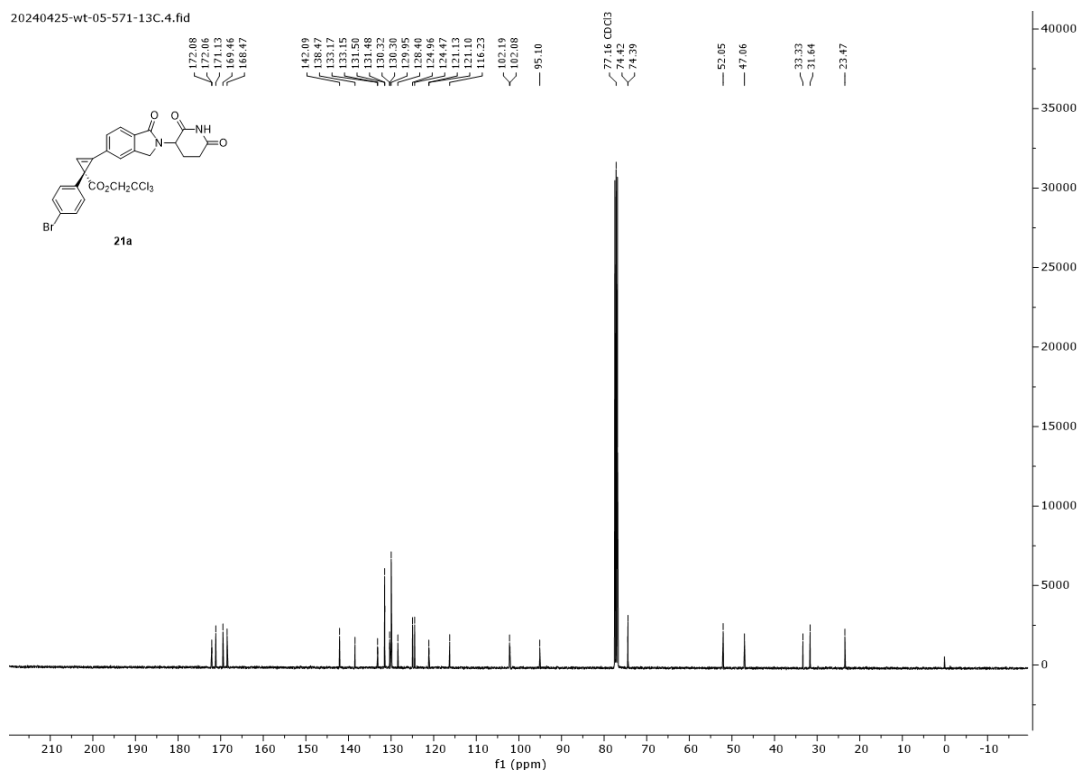

### $^{13}\text{C}\{^1\text{H}\}$ NMR Spectrum for Compounds 22a and 22b.

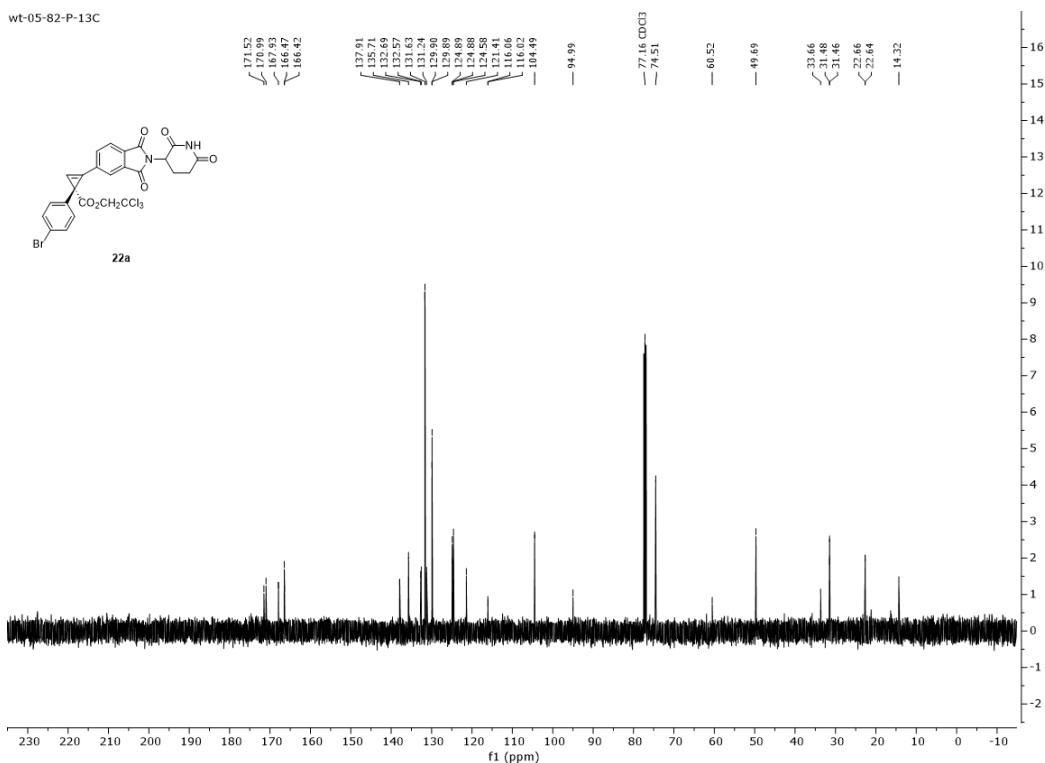

### $^{13}\text{C}\{^1\text{H}\}$ NMR Spectrum for Compounds 23a and 23b.

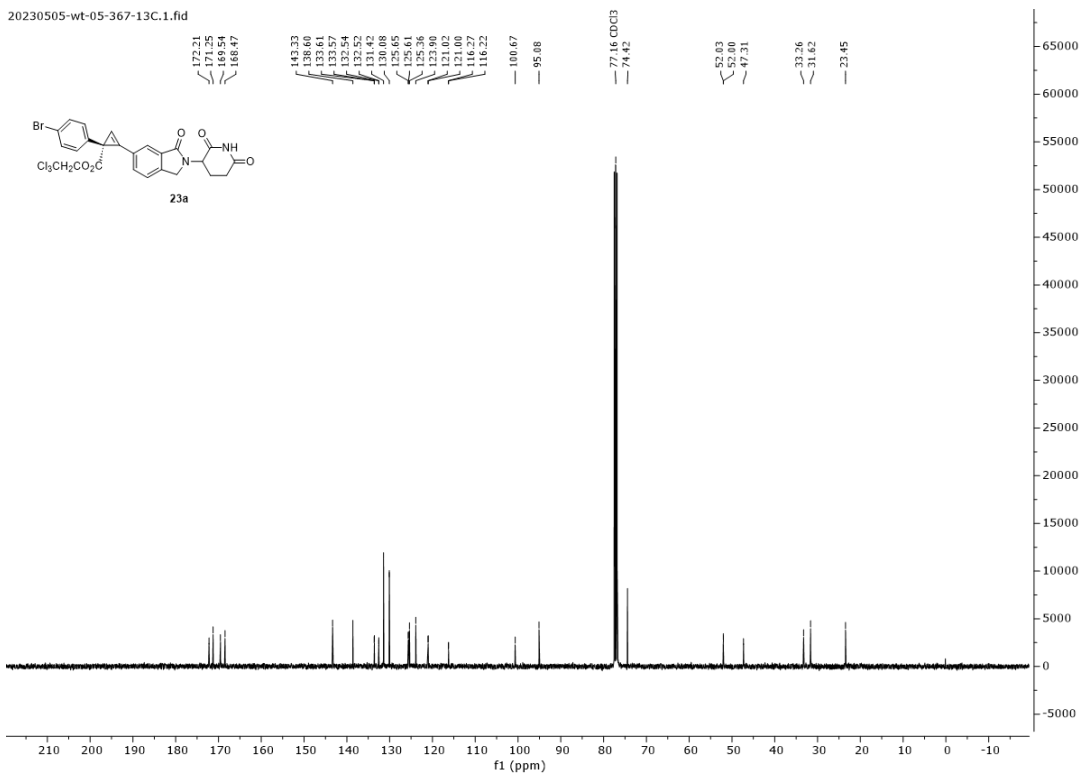

### $^{13}\text{C}\{^1\text{H}\}$ NMR Spectrum for Compounds 24a and 24b.

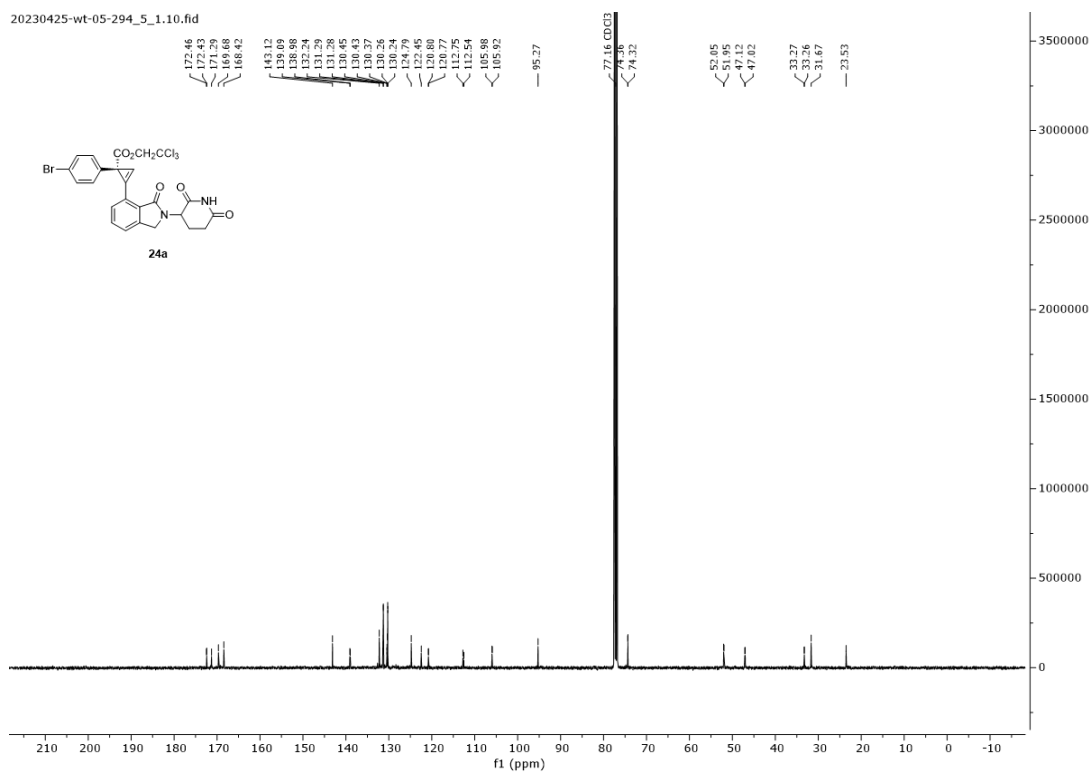

### $^{13}\text{C}\{^1\text{H}\}$ NMR Spectrum for Compounds 25a and 25b.

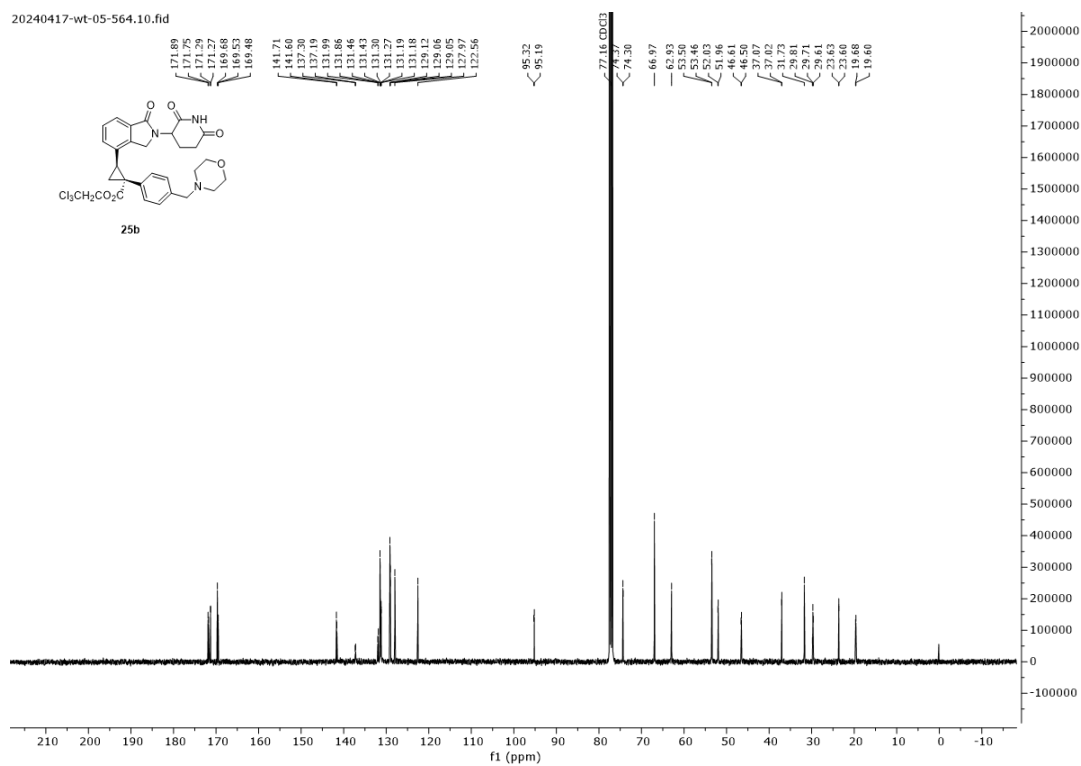

### $^{13}\text{C}\{^1\text{H}\}$ NMR Spectrum for Compounds 26a and 26b.

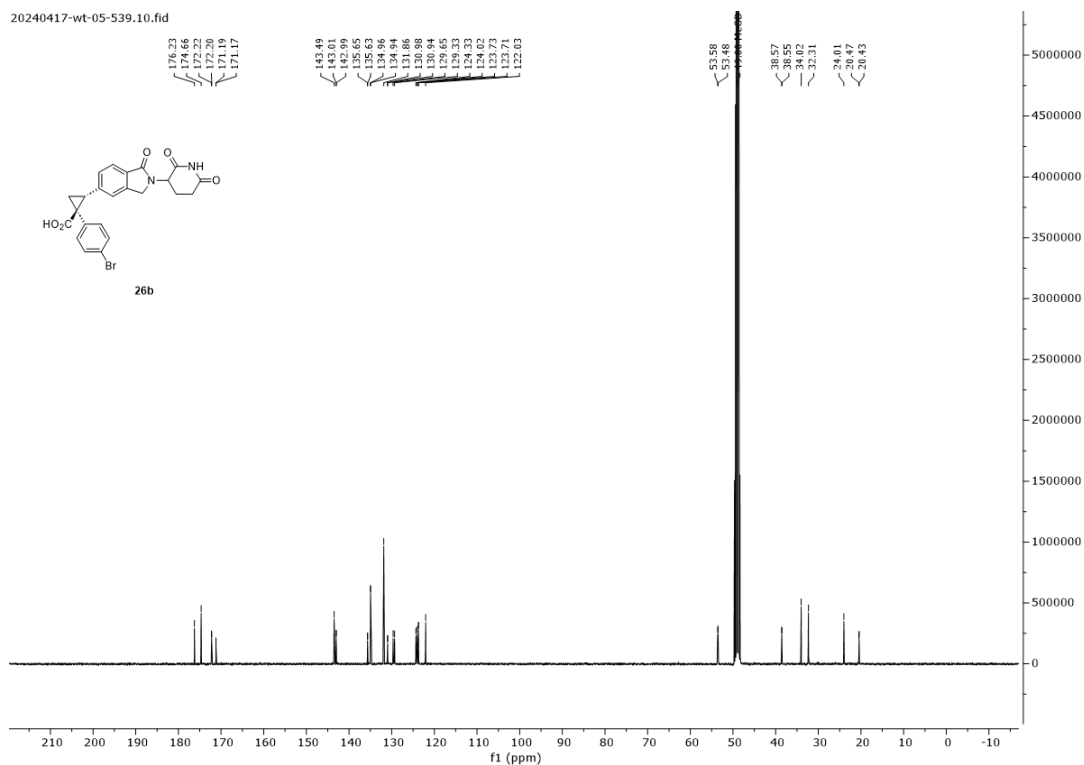

### $^{13}\text{C}\{^1\text{H}\}$ NMR Spectrum for Compounds 27a and 27b.

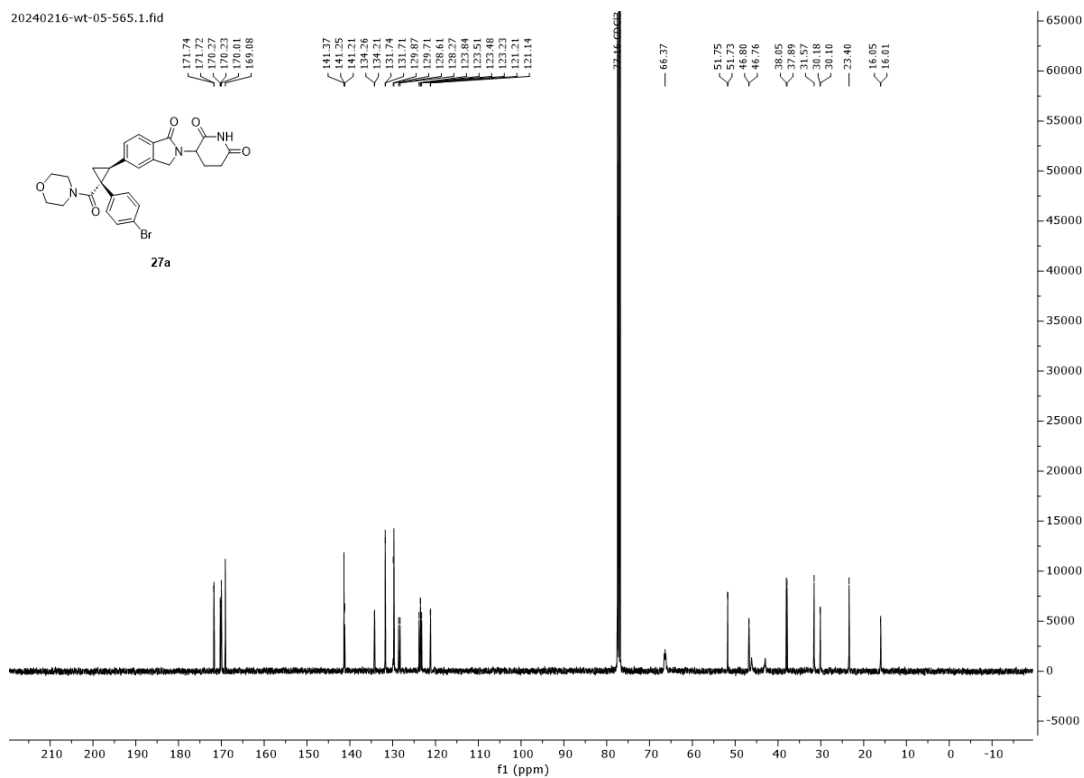



# Section 5: Chromatographic Data

## Chiral SFC Chromatograms

### Racemic Chromatogram, 13

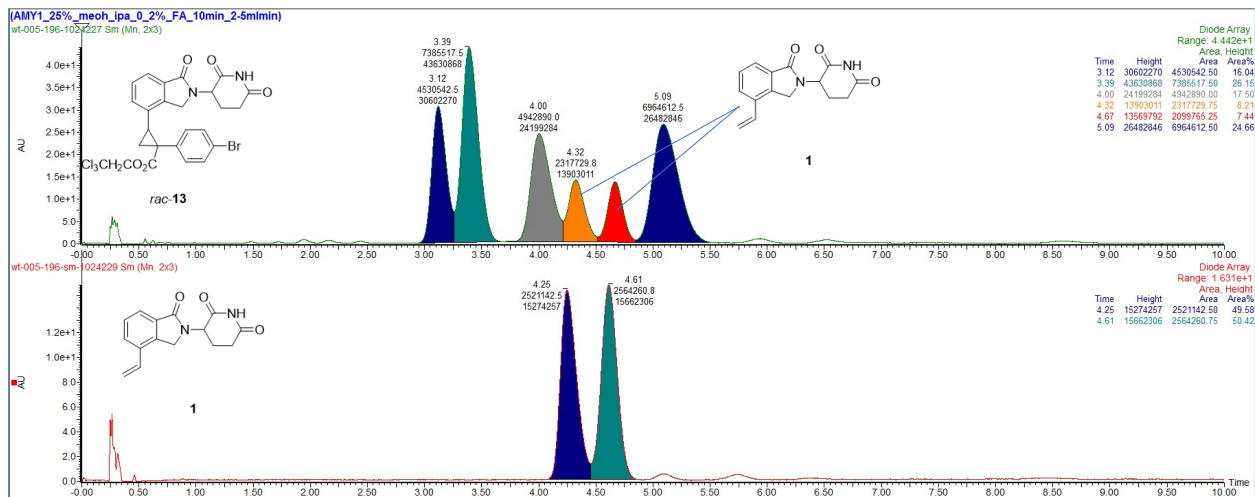

13a

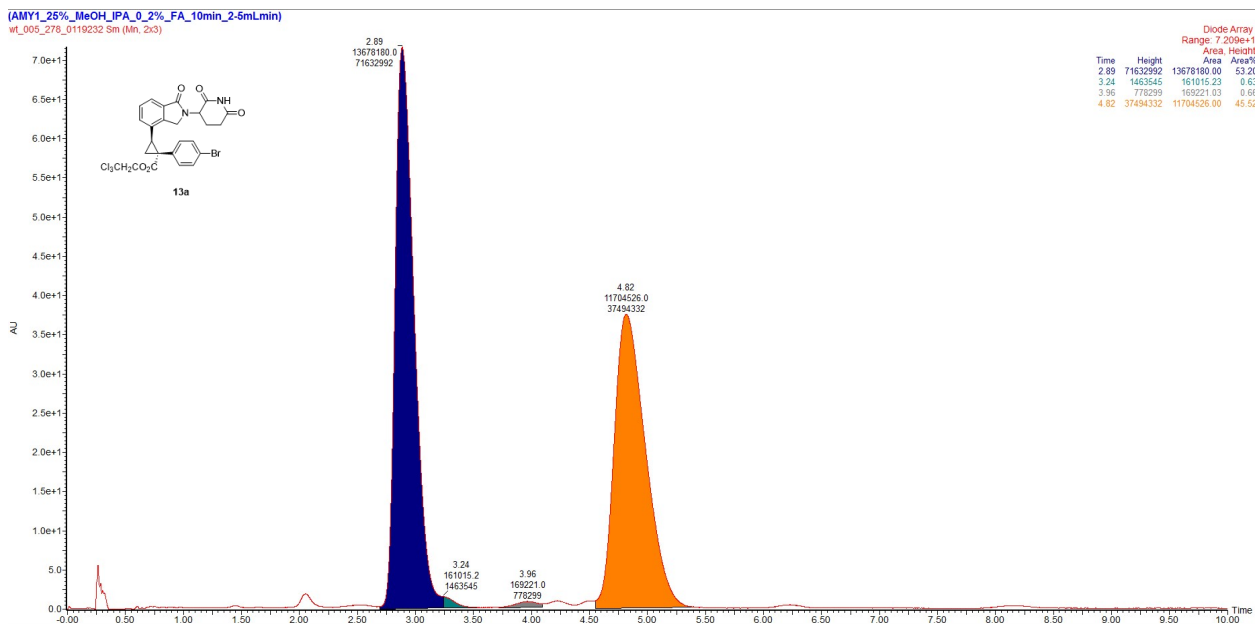

# 13b

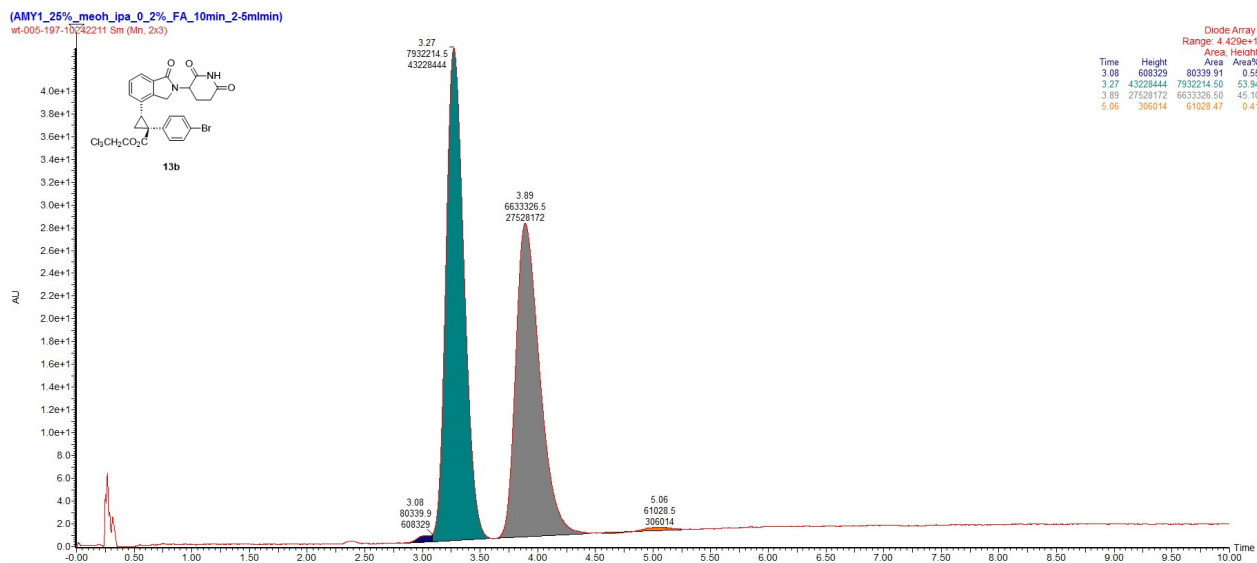

# Racemic Chromatogram, 14

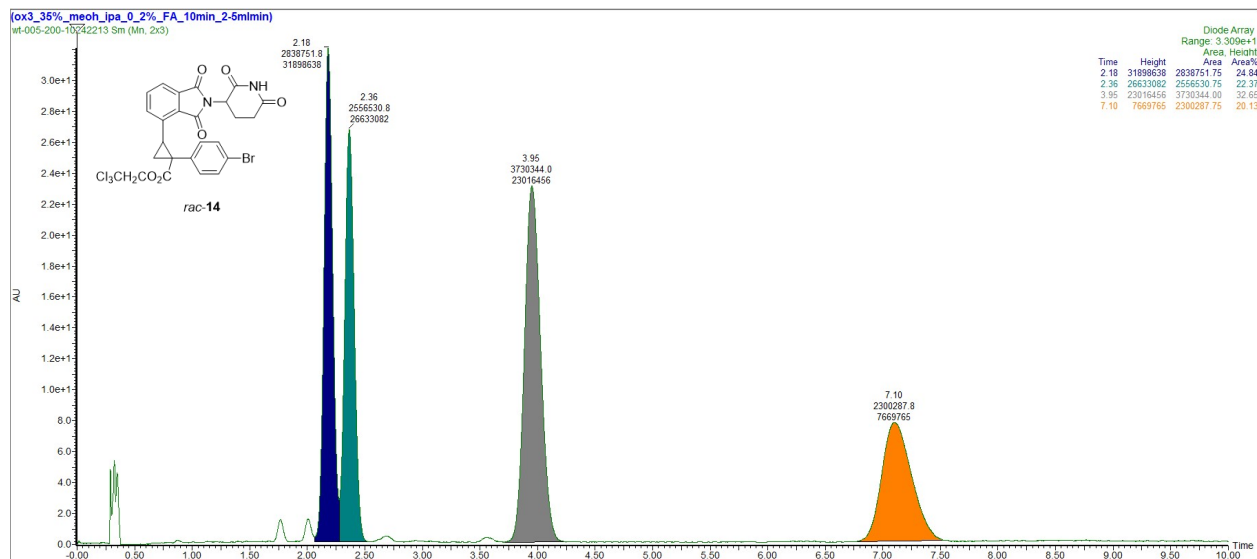

# 14a

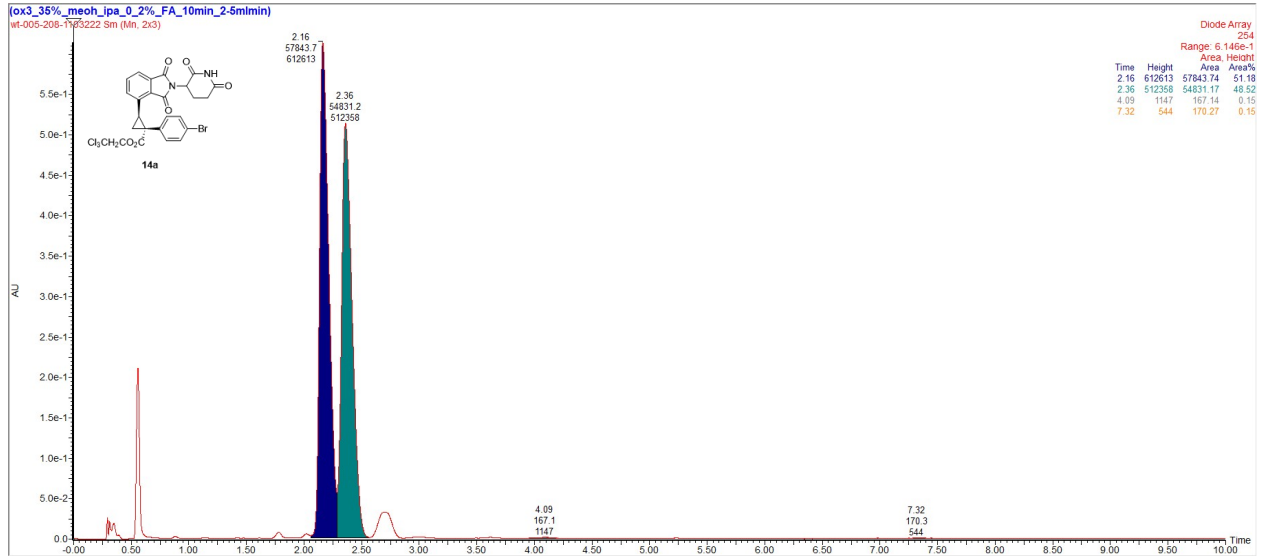

# 14b

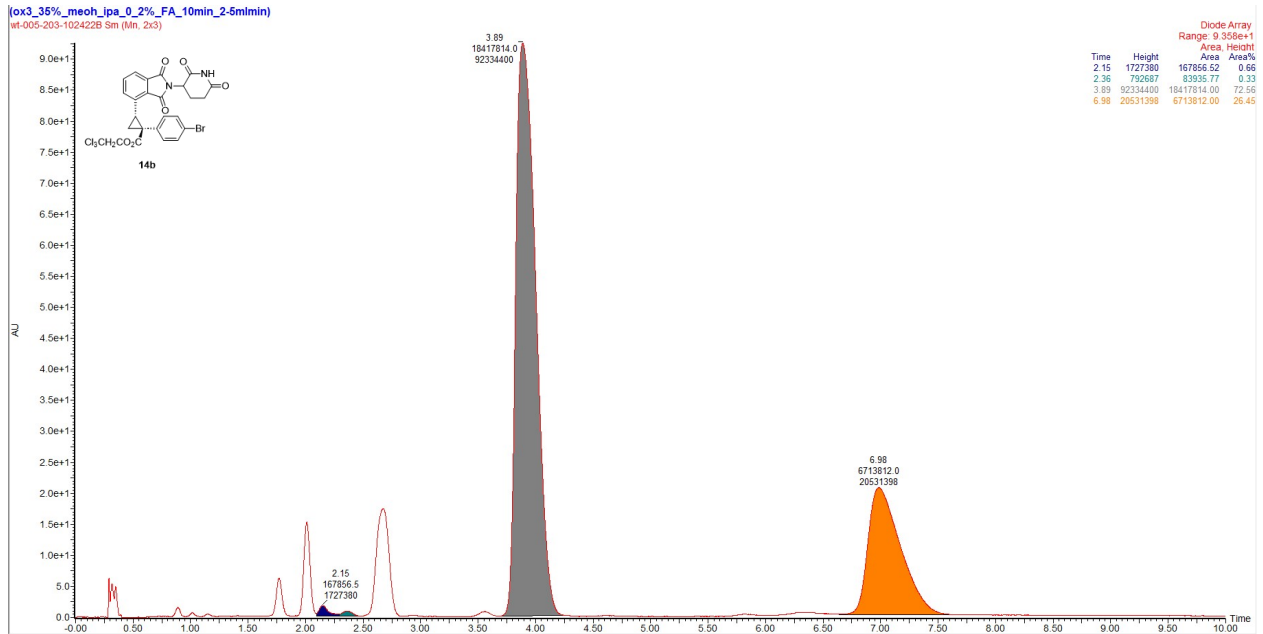

# Racemic Chromatogram, 15

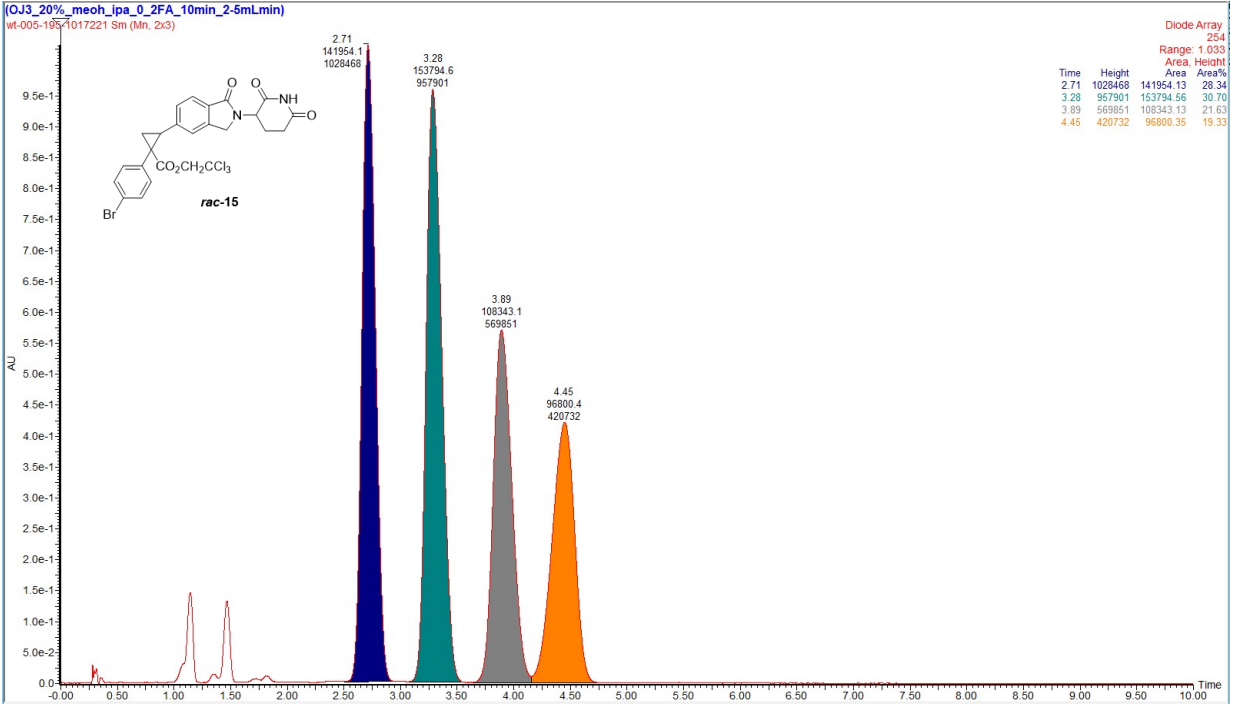

15a

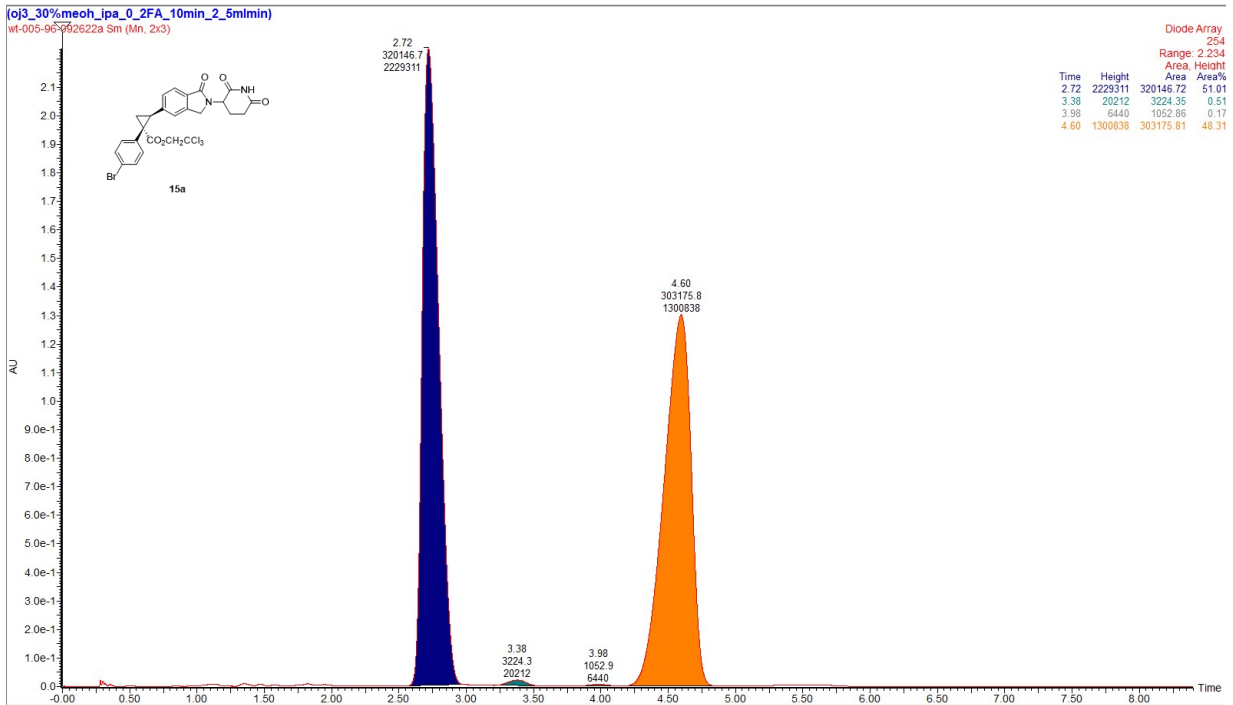

# 15b

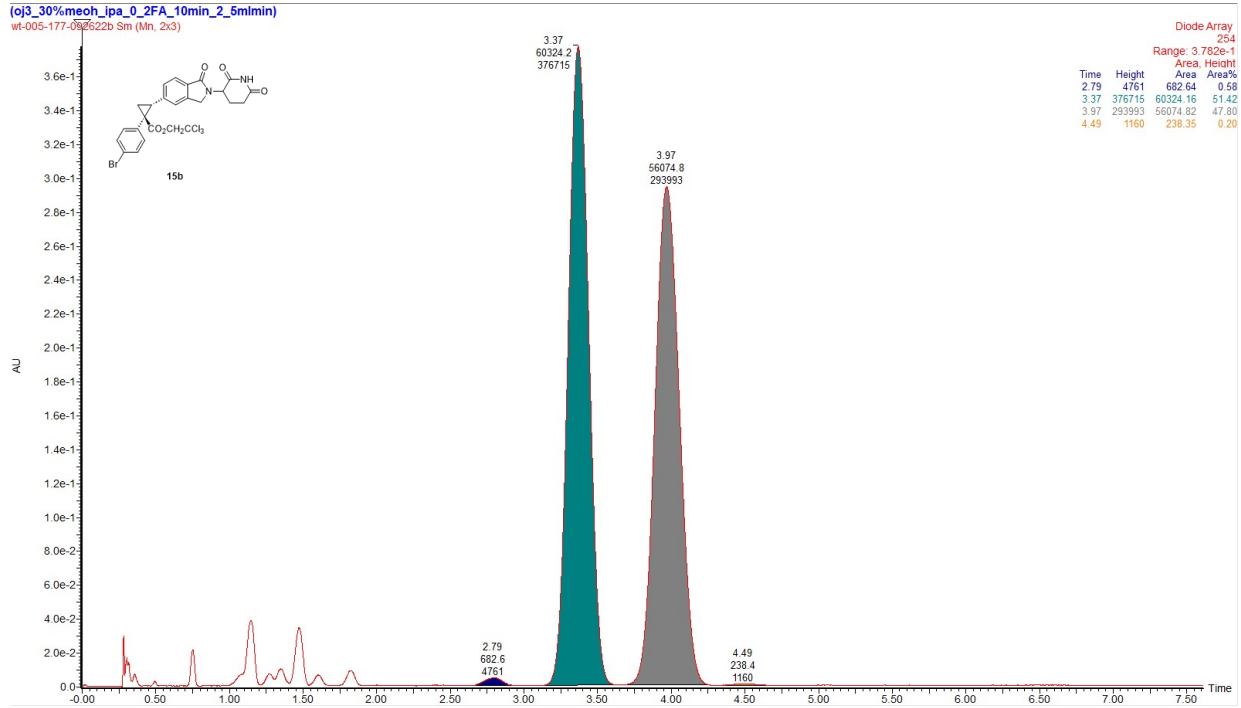

# S-15a

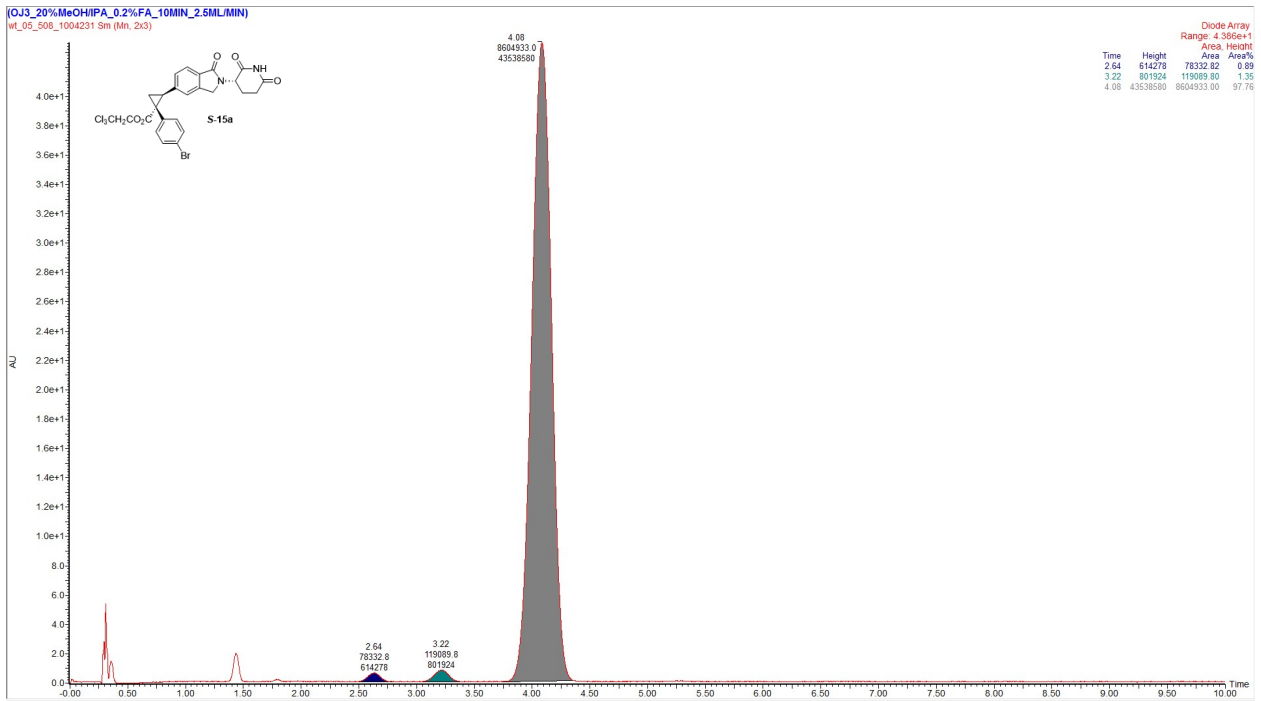

## S-15b

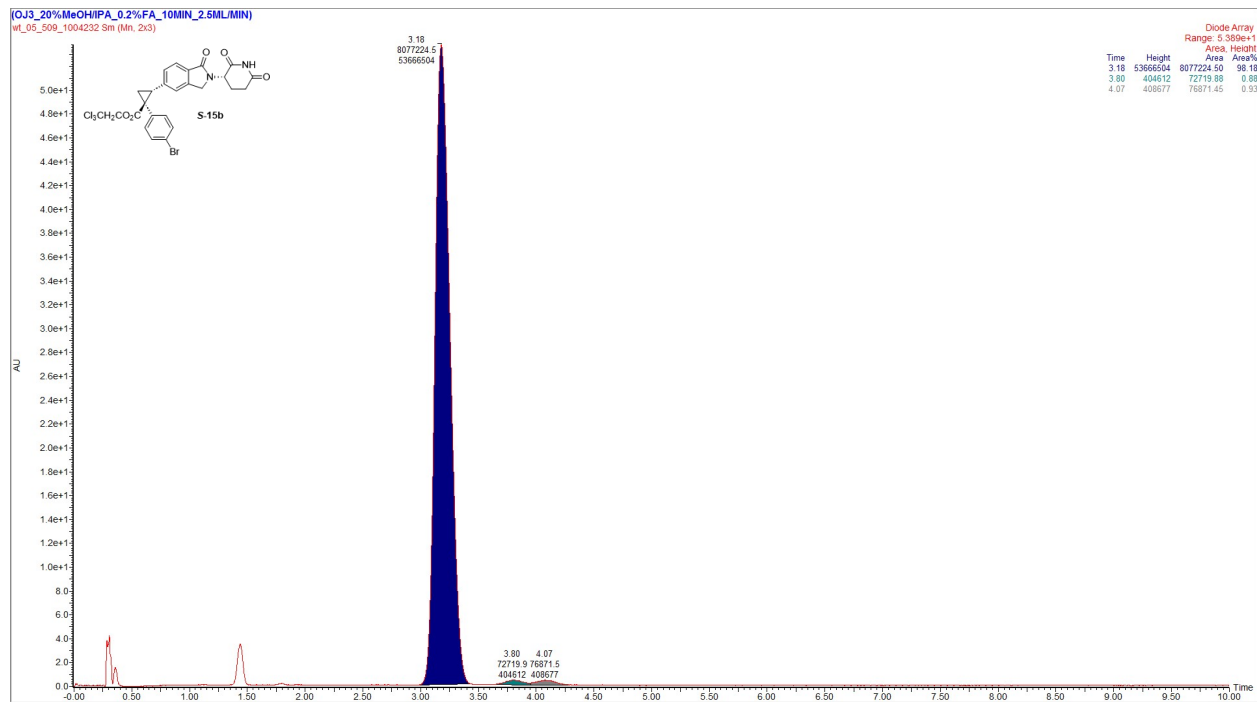

## R-15a

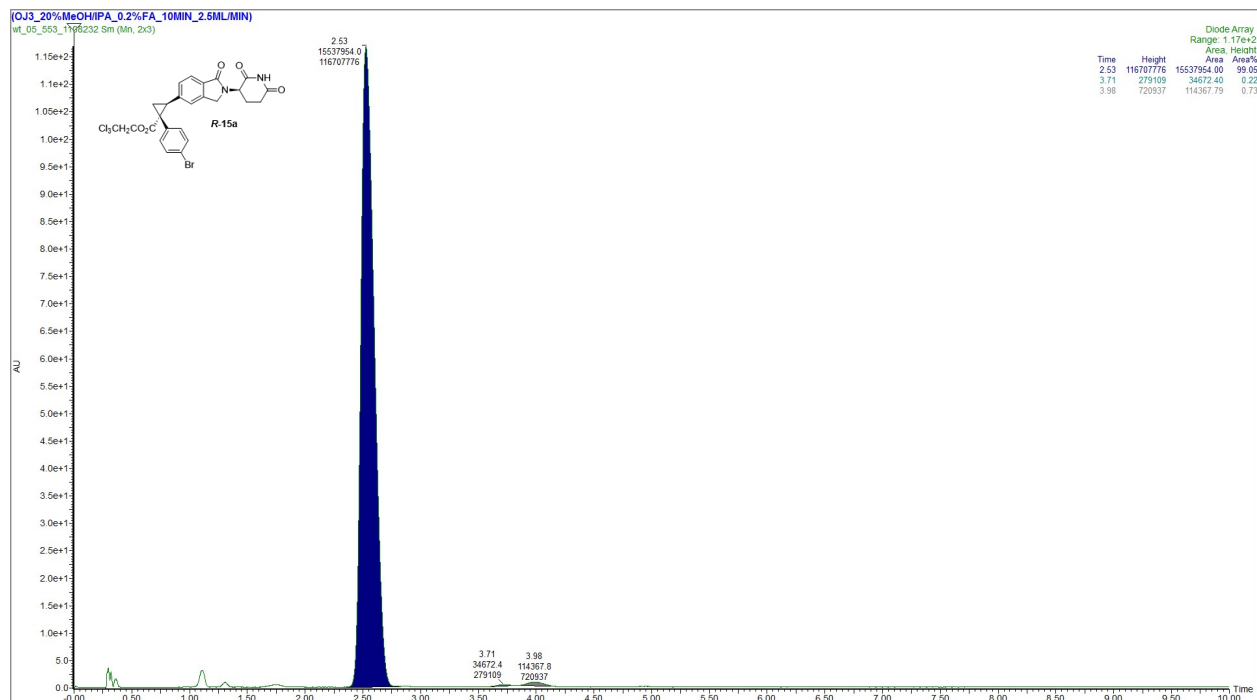

# R-15b

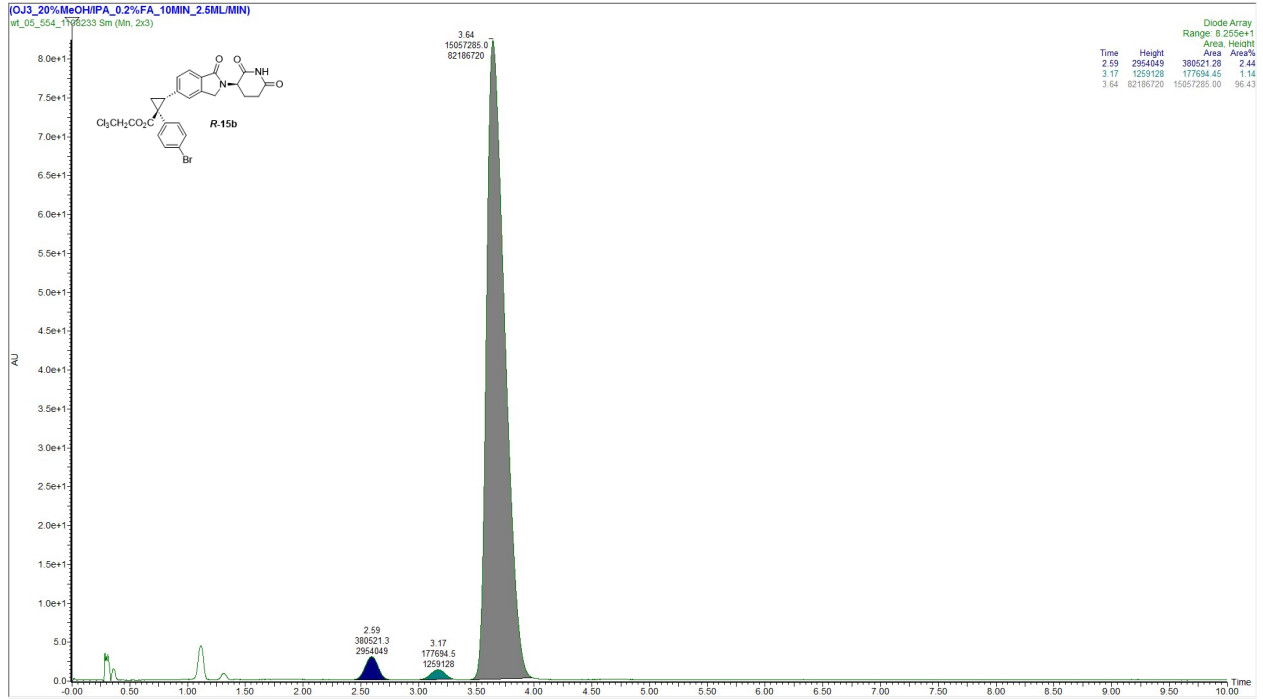

# Racemic Chromatogram, 16

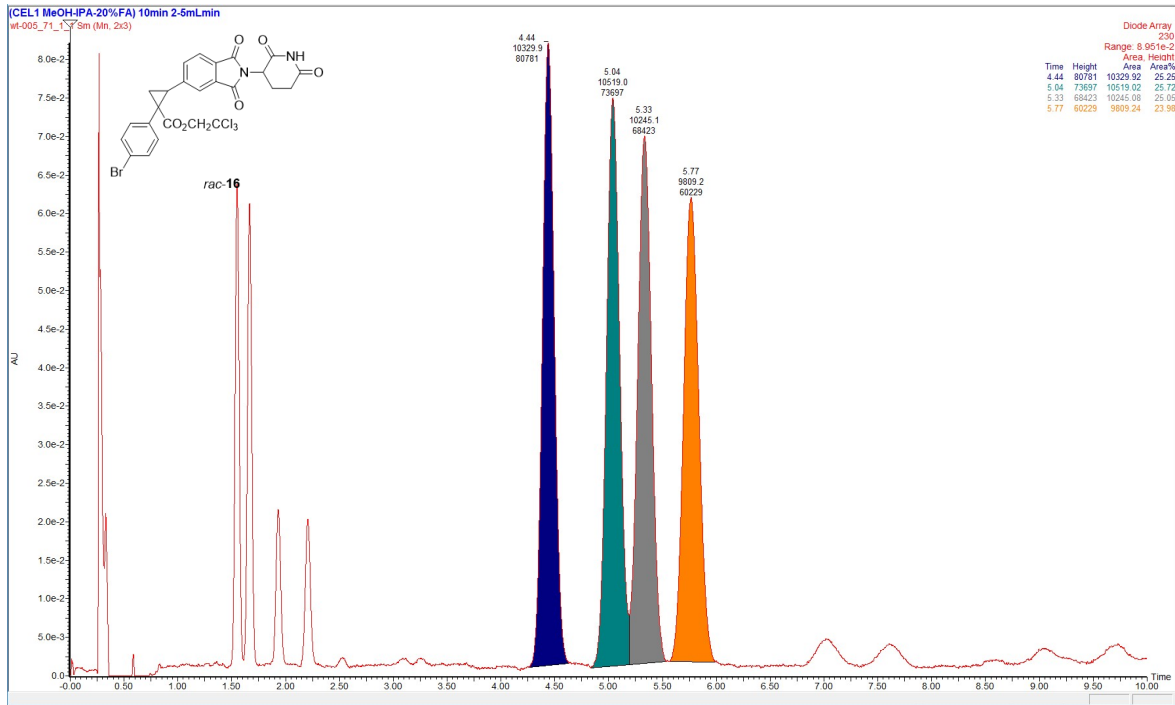

# 16a

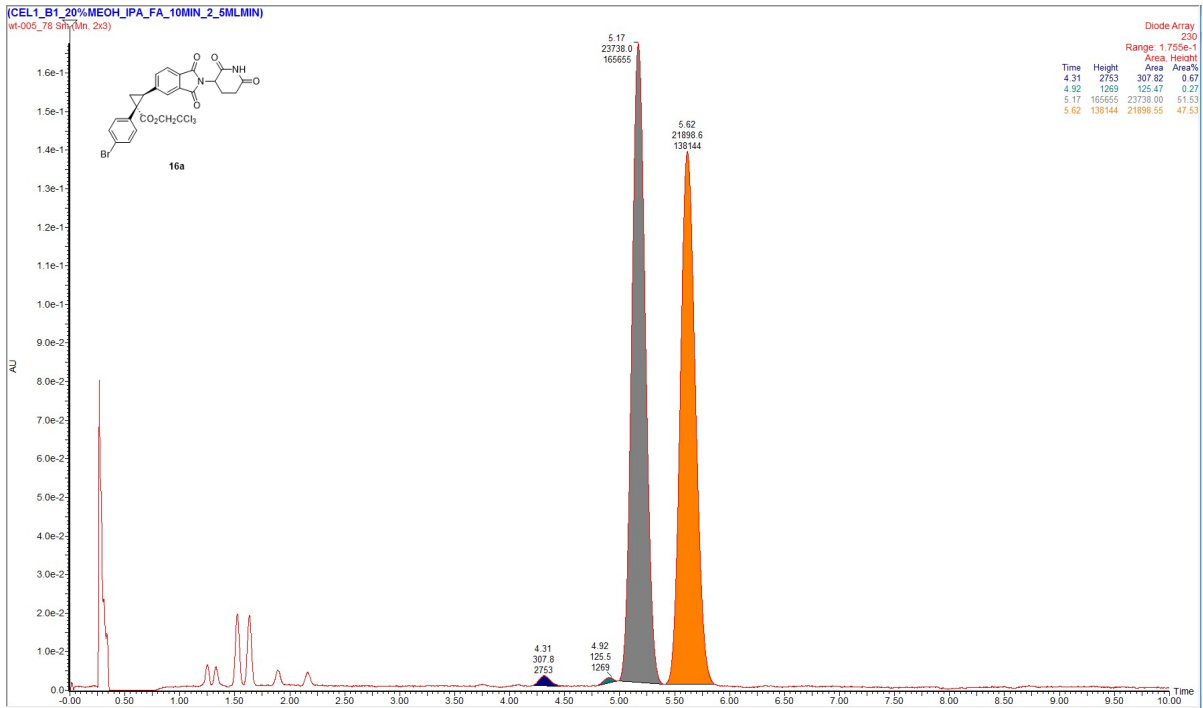

# 16b

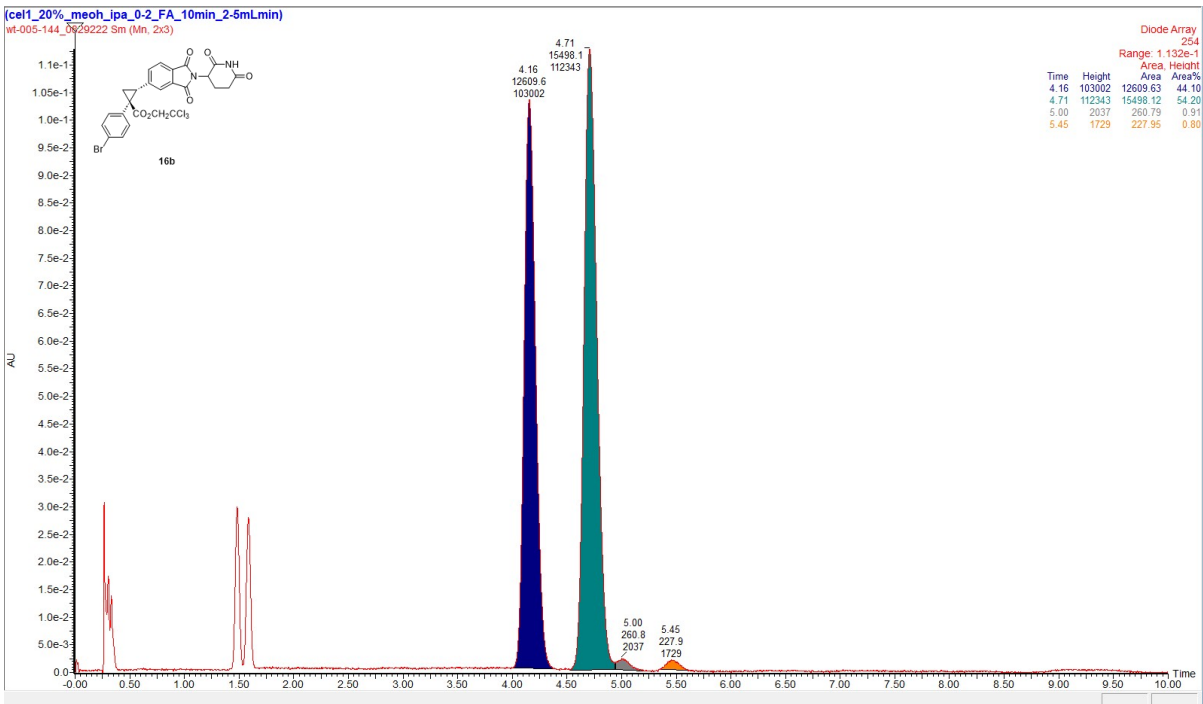



# Racemic Chromatogram, 17

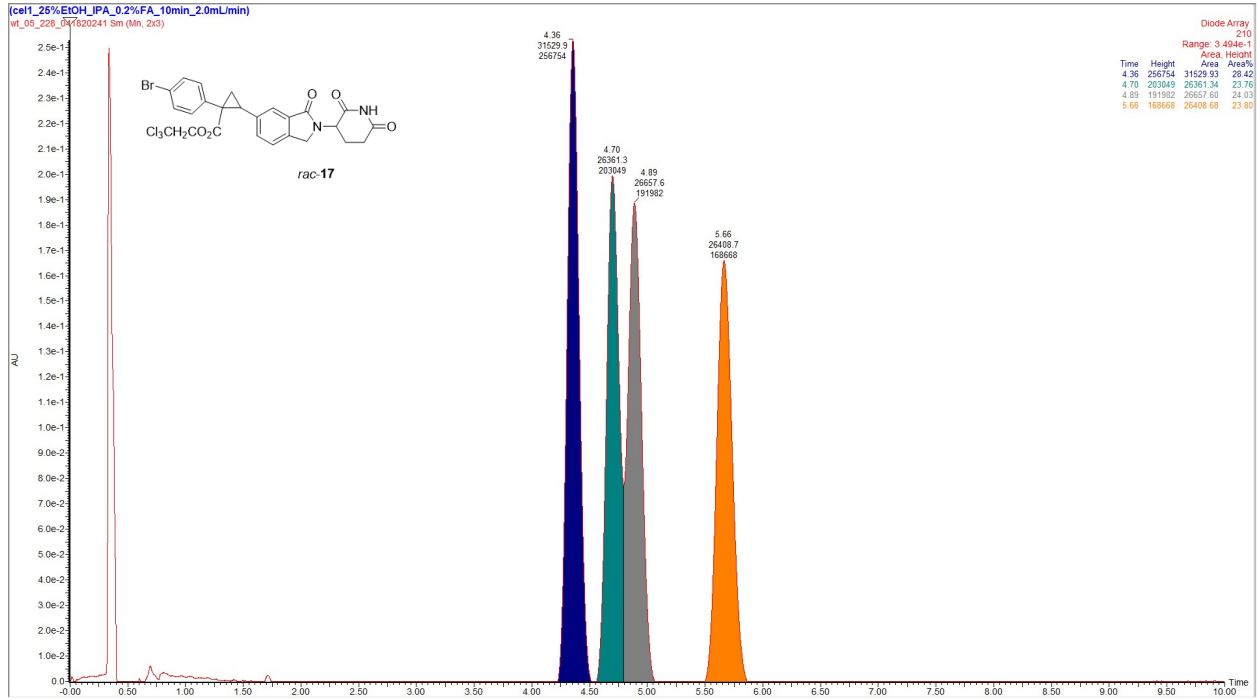

17a

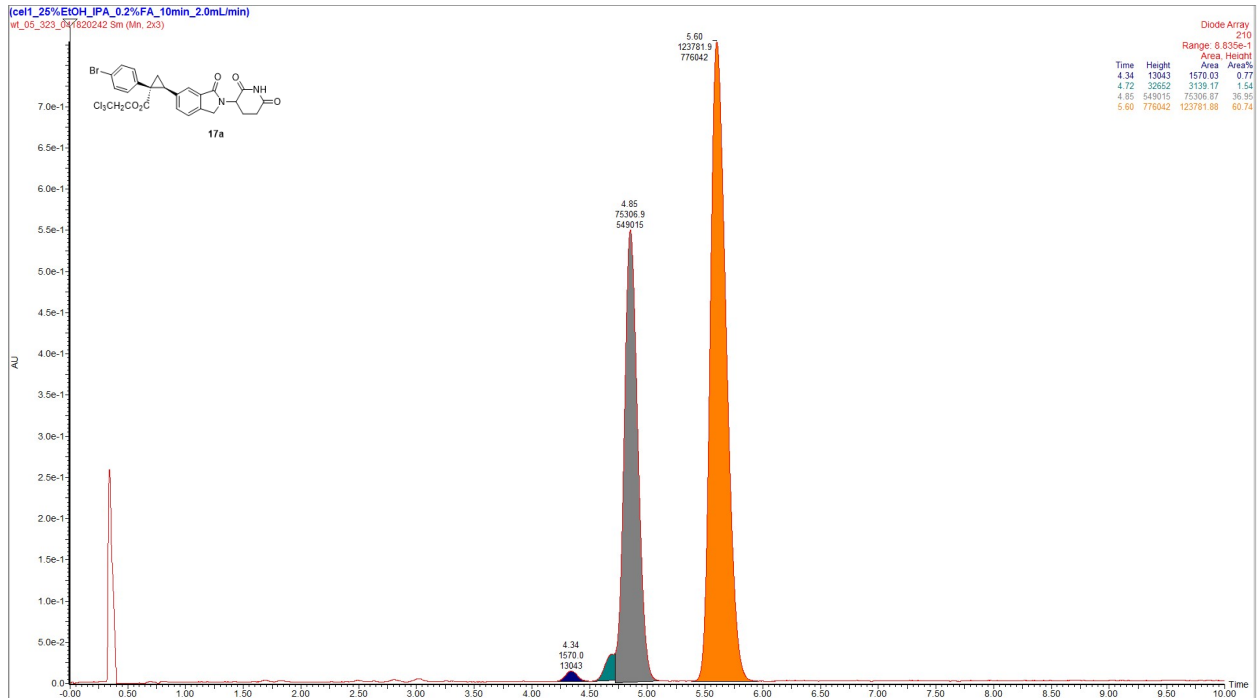

# 17b

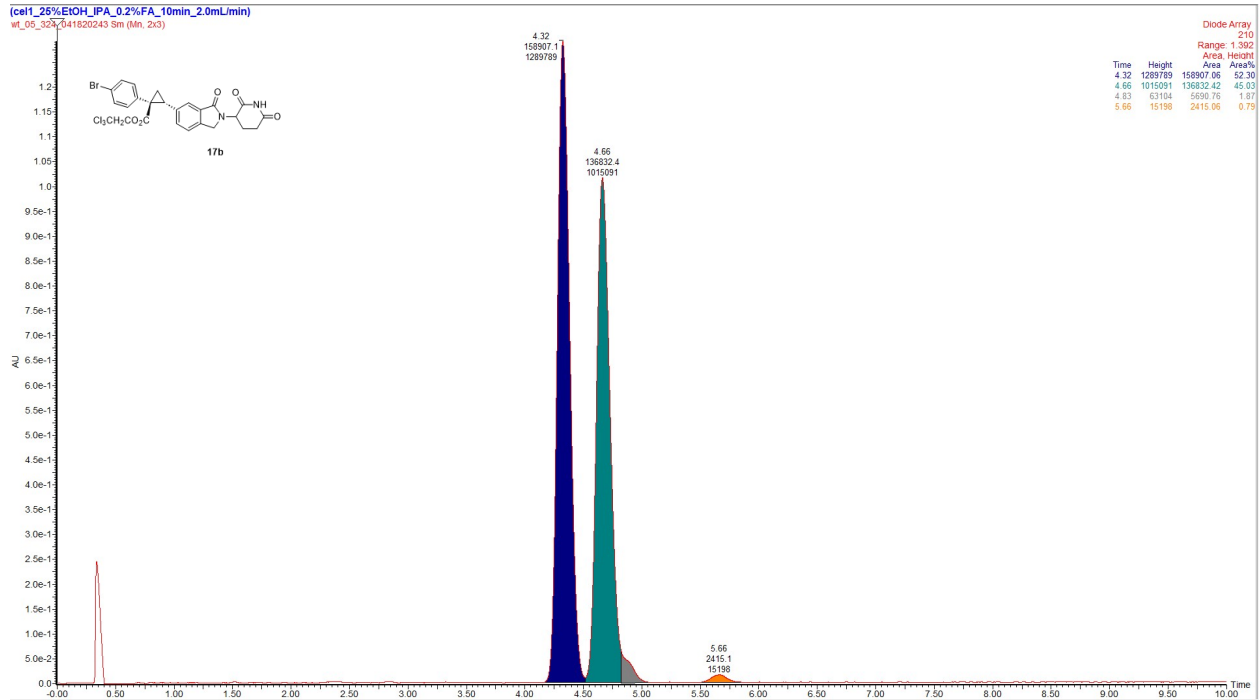

## Racemic Chromatogram, 18

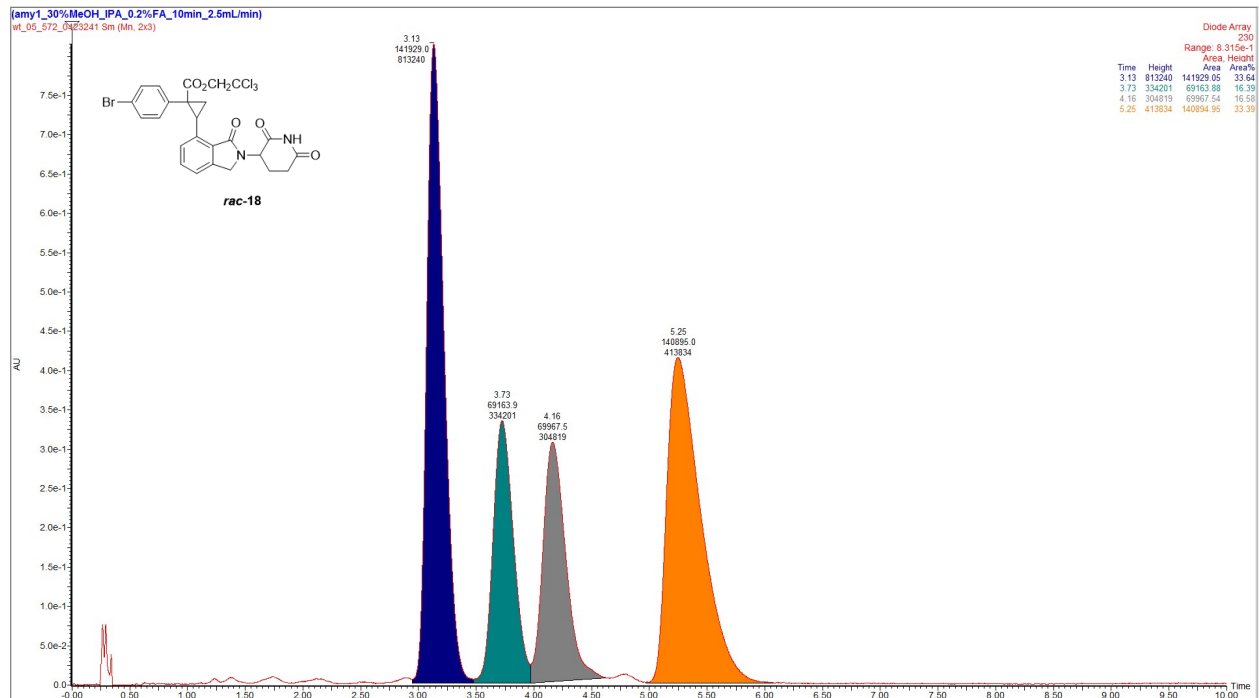

# 18a

[amy1\_30%MeOH\_IPA\_0.2%FA\_10min\_2.6mL/min]  
 wt\_05\_2035\_0422243 Sm (Min, 2x3)

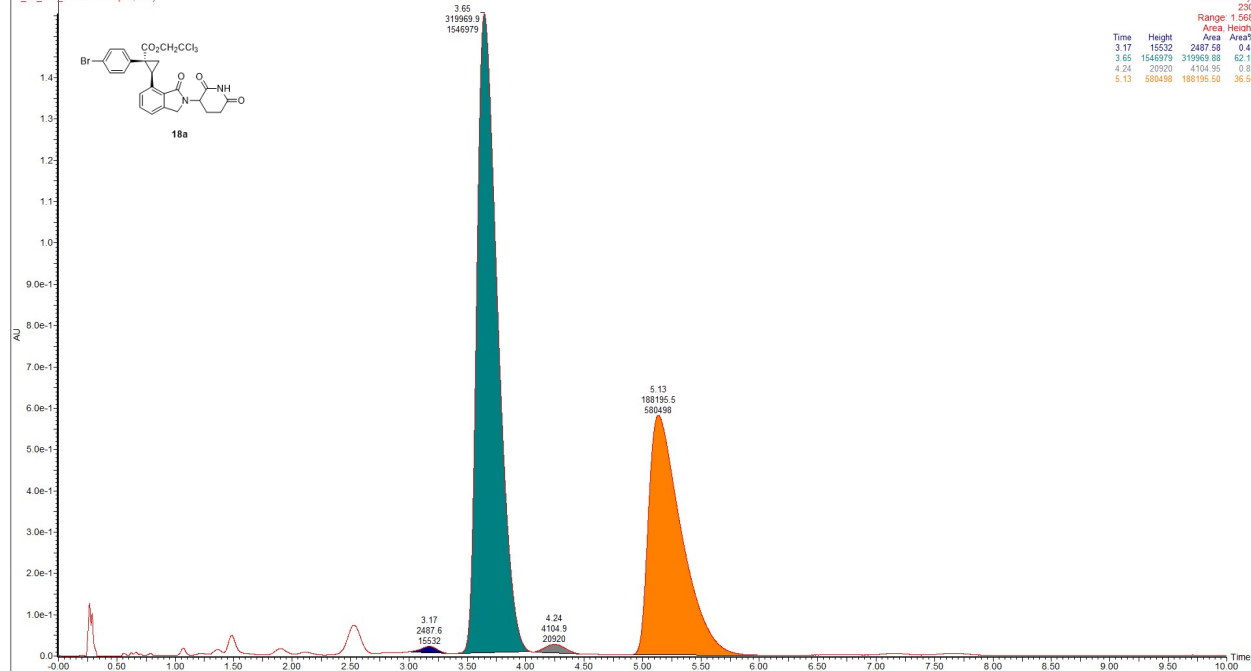

# 18b

[amy1\_30%MeOH\_IPA\_0.2%FA\_10min\_2.6mL/min]  
 wt\_05\_5735\_0423242 Sm (Min, 2x3)

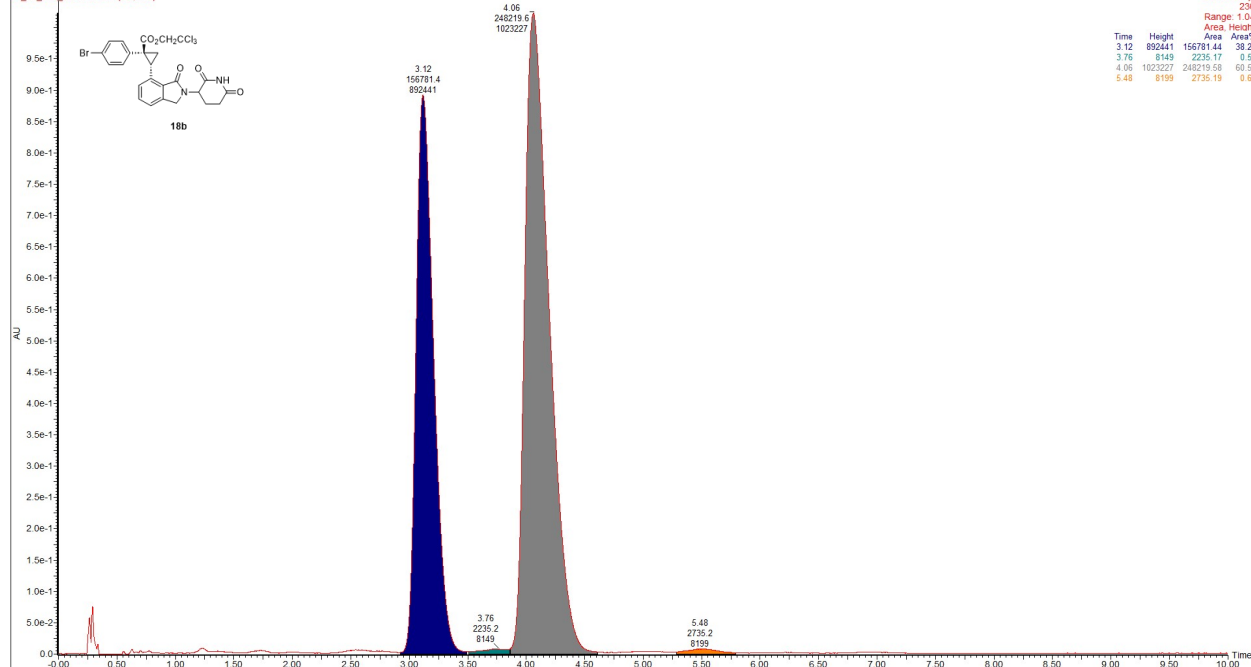

# Racemic Chromatogram, 19

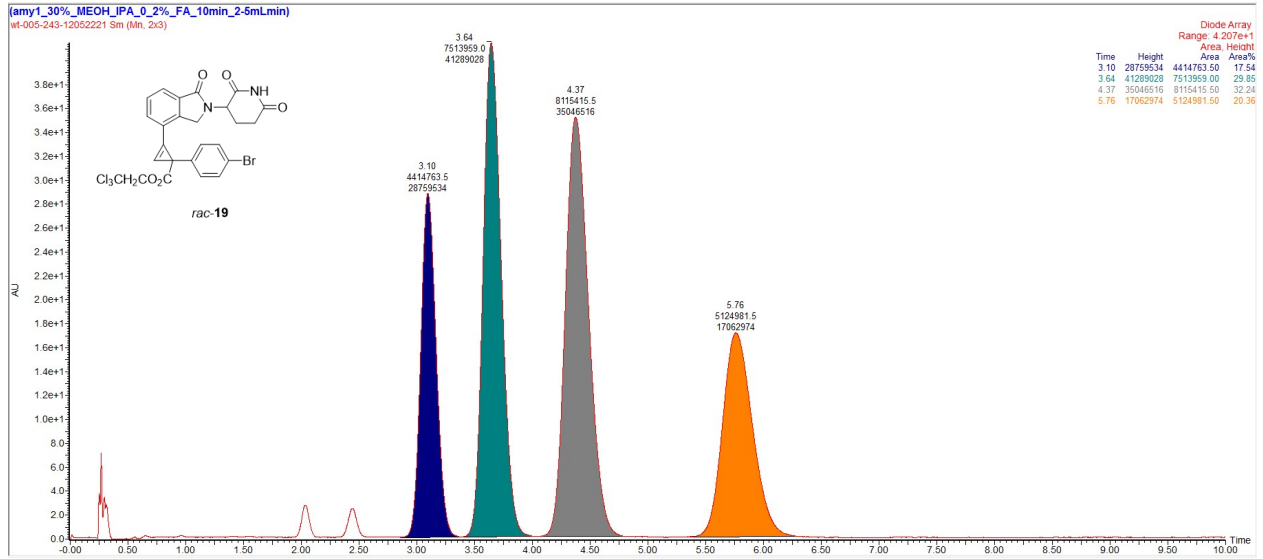

19a

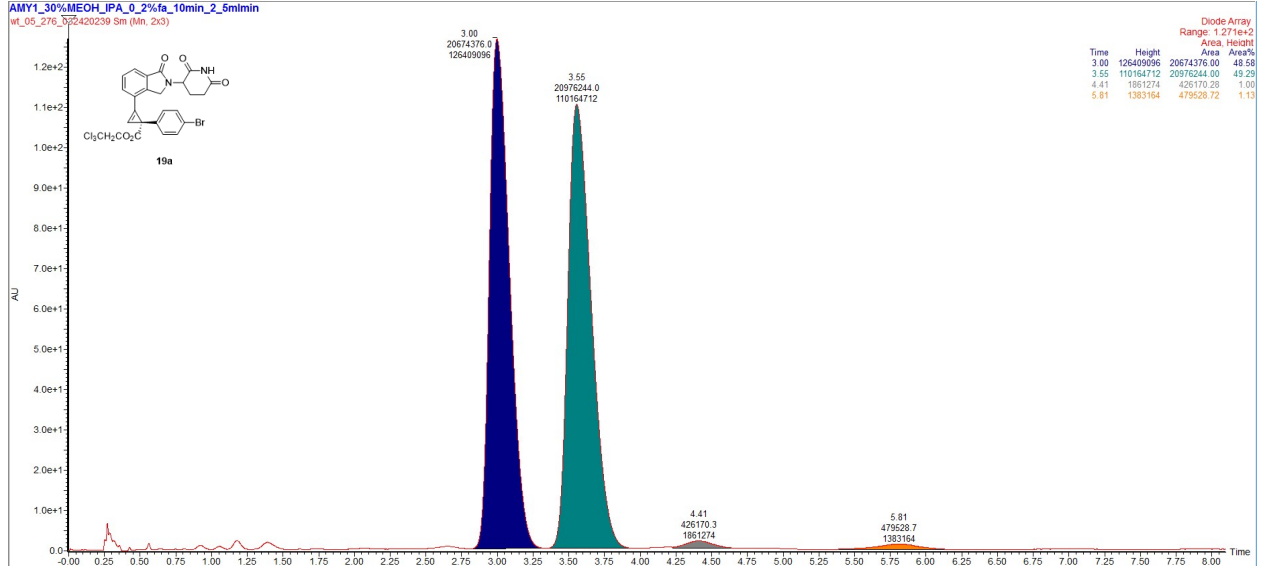

# 19b

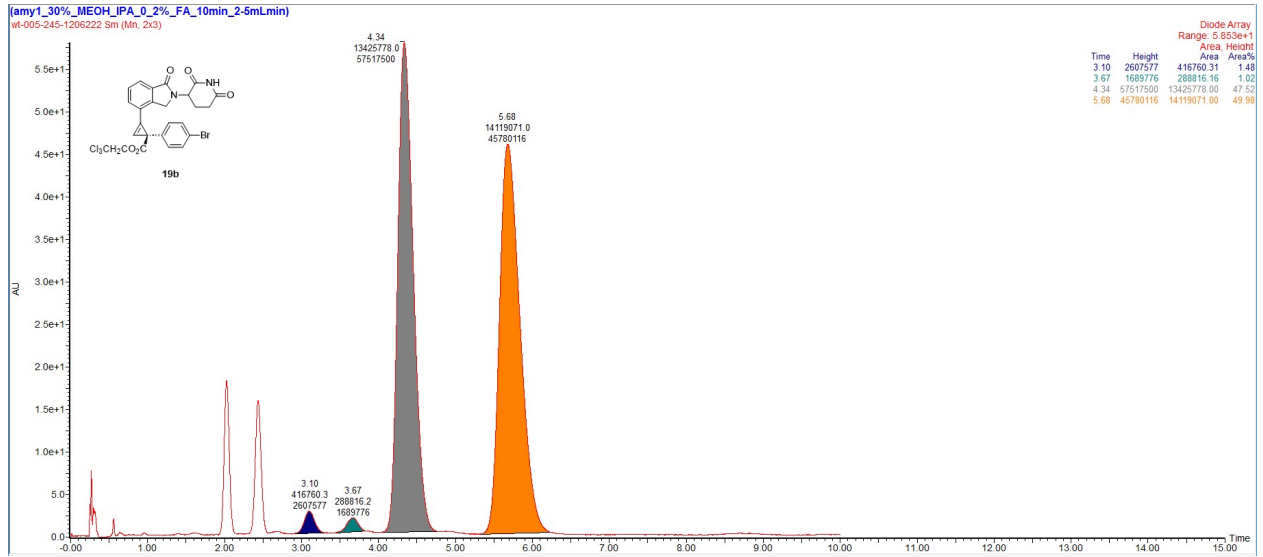

## Racemic Chromatogram, 20

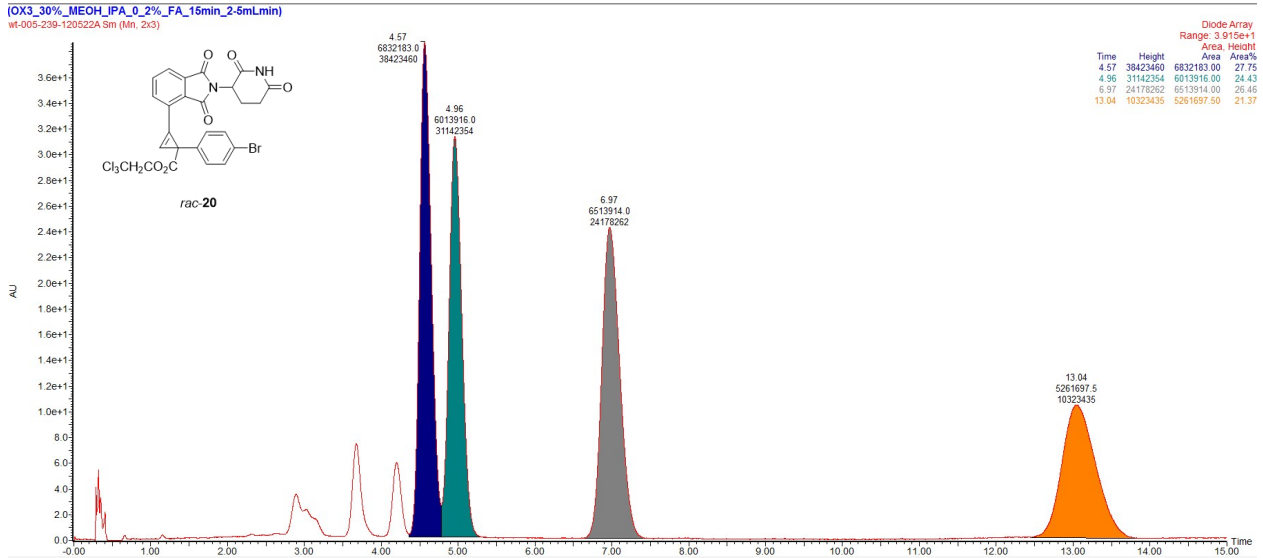

## 20a

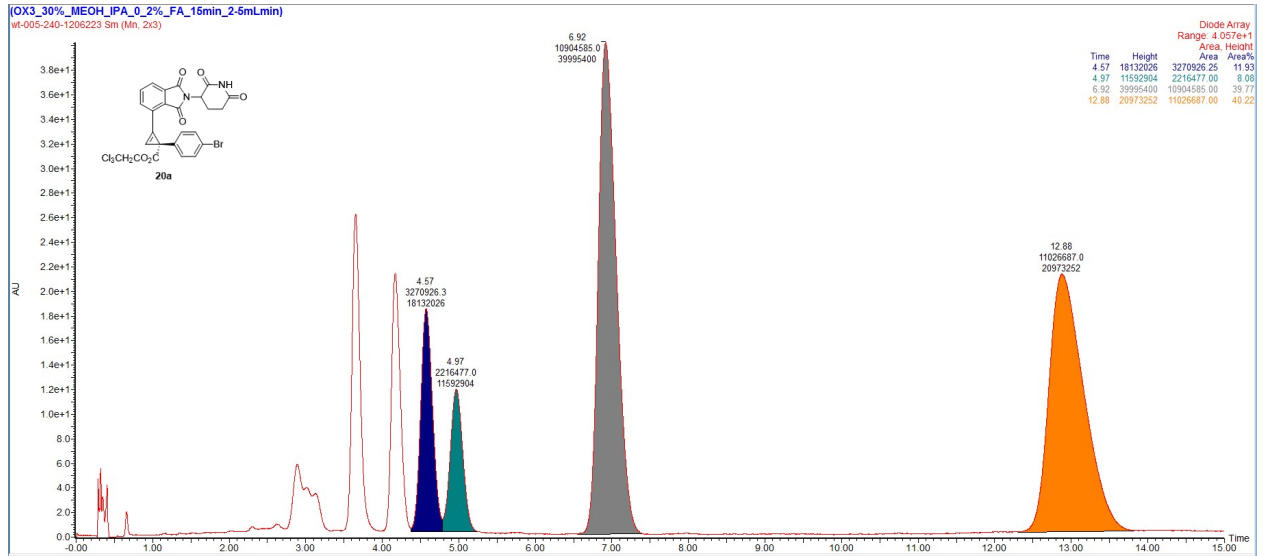

## 20b

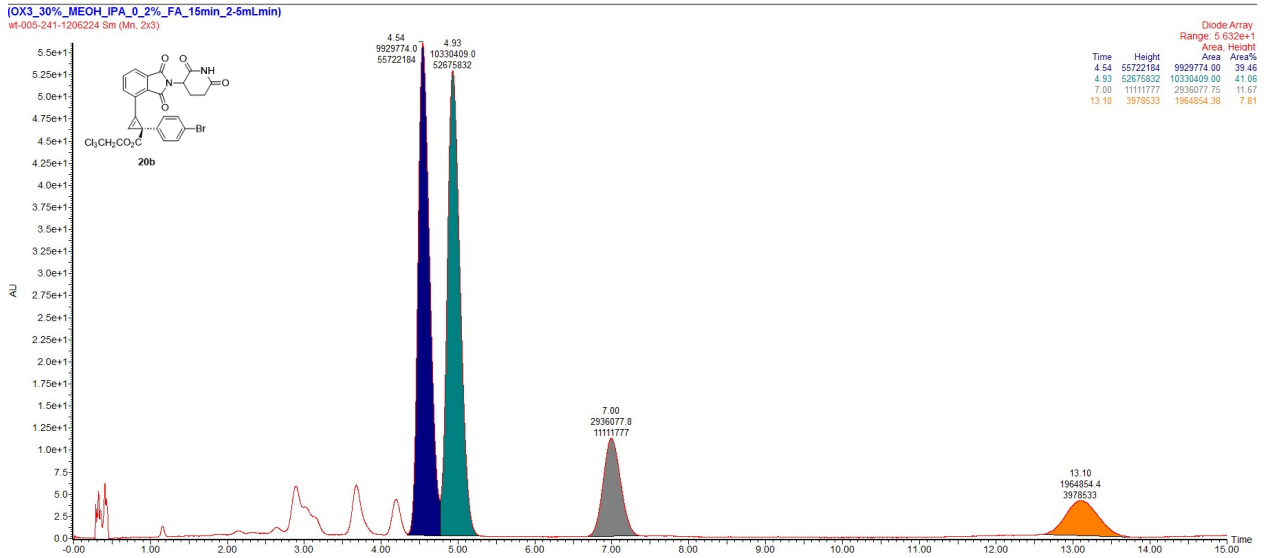

# Racemic Chromatogram, 21

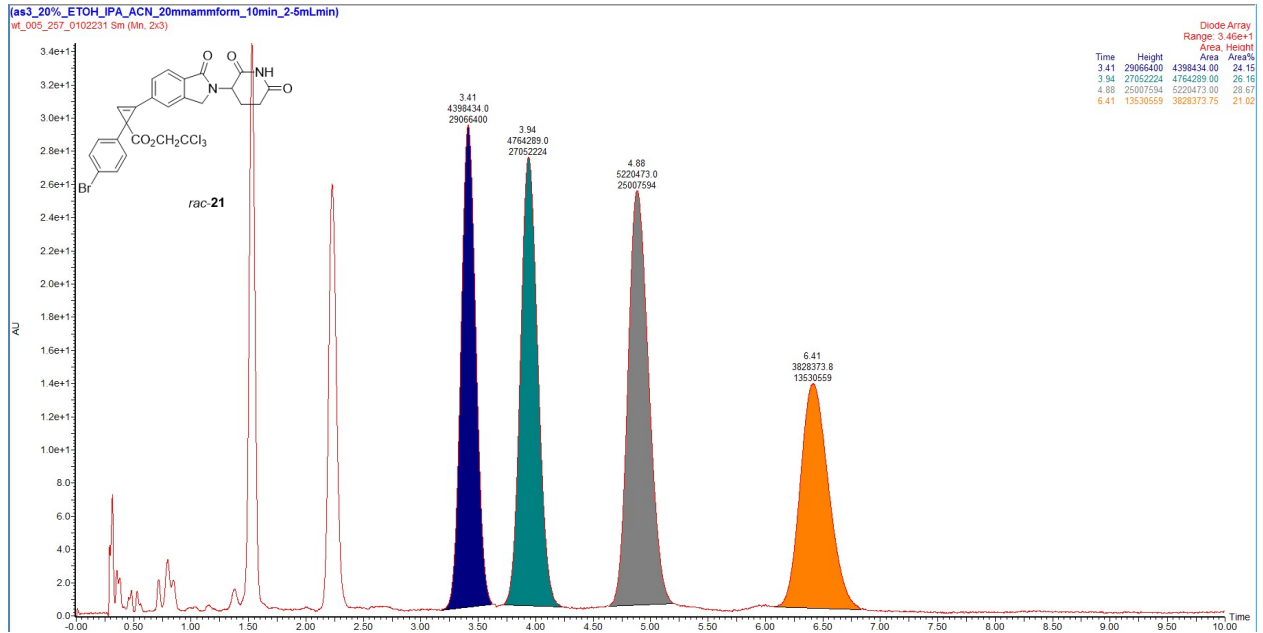

## 21a

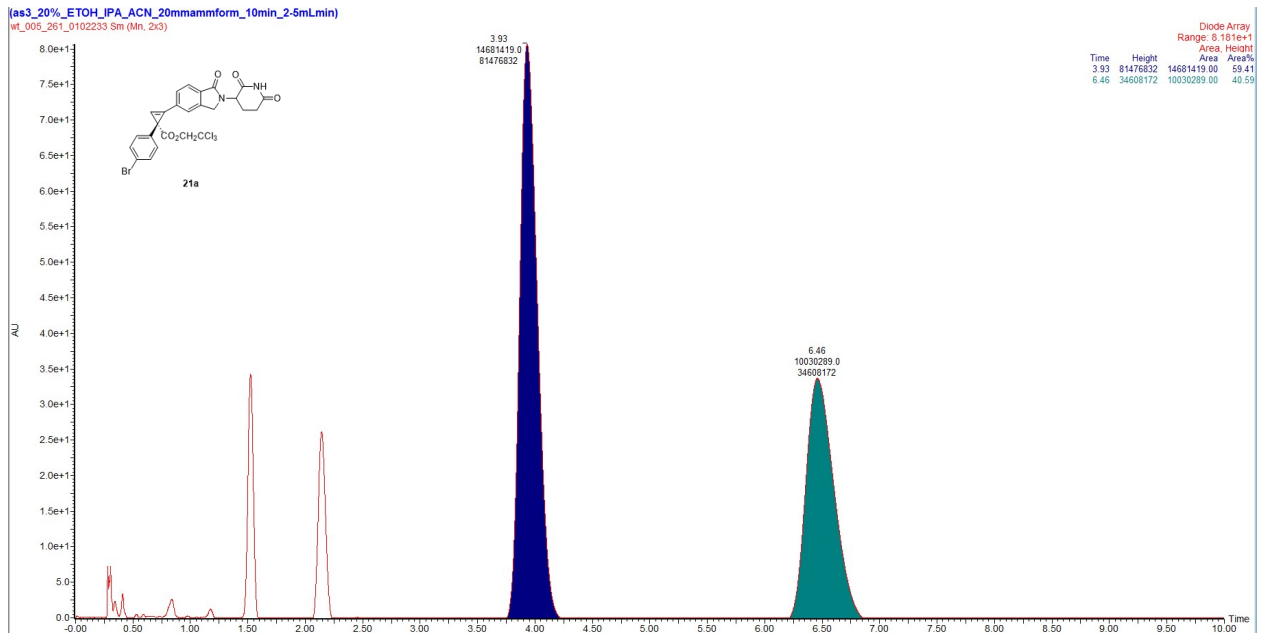

## 21b

(as3\_20%\_ETOH\_IPA\_ACN\_20mmmmform\_10min\_2-5mLmin)  
wt\_005\_262\_0102234 Sm (Mn, 2x3)

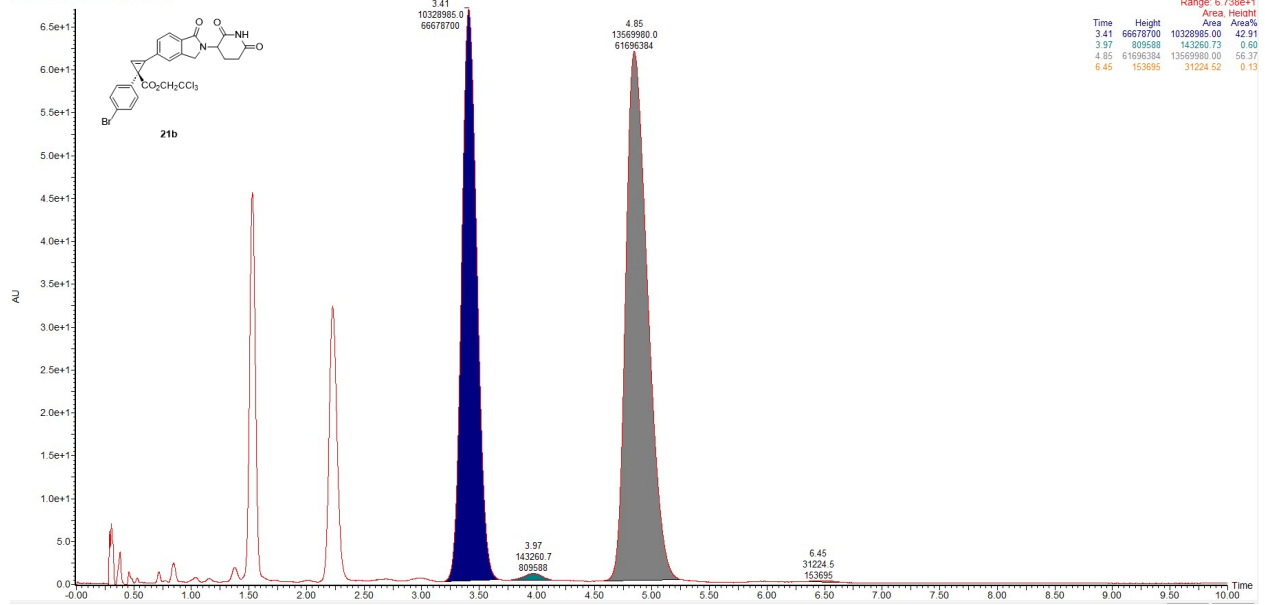

## Racemic Chromatogram, 22

(cj3\_20%\_MEOH\_IPA\_0\_2%\_FA\_15MIN2\_5minin)  
wt-005-101-0523228 Sm (Mn, 2x3)

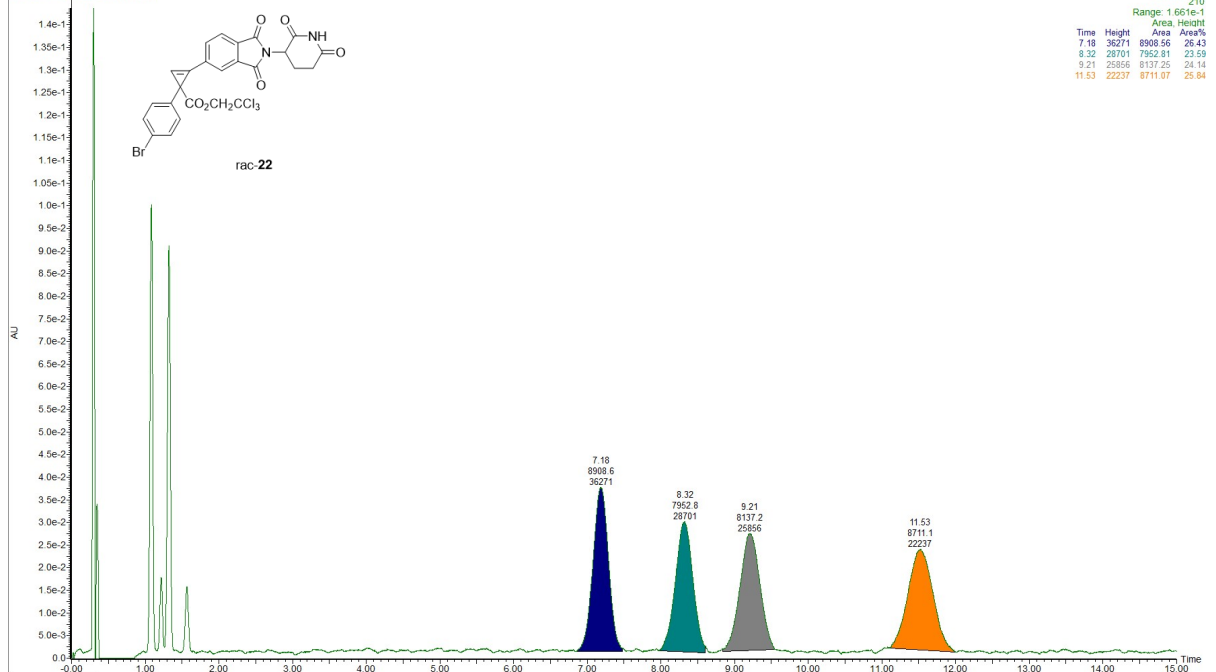



## 22a

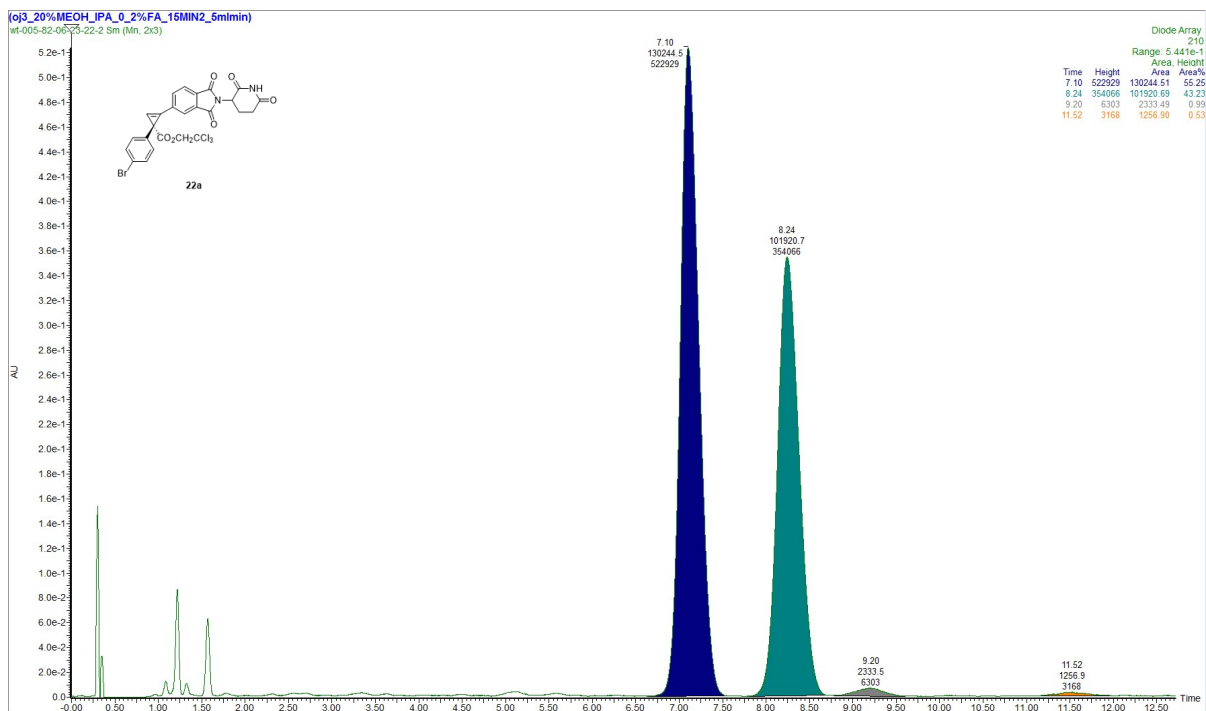

## 22b

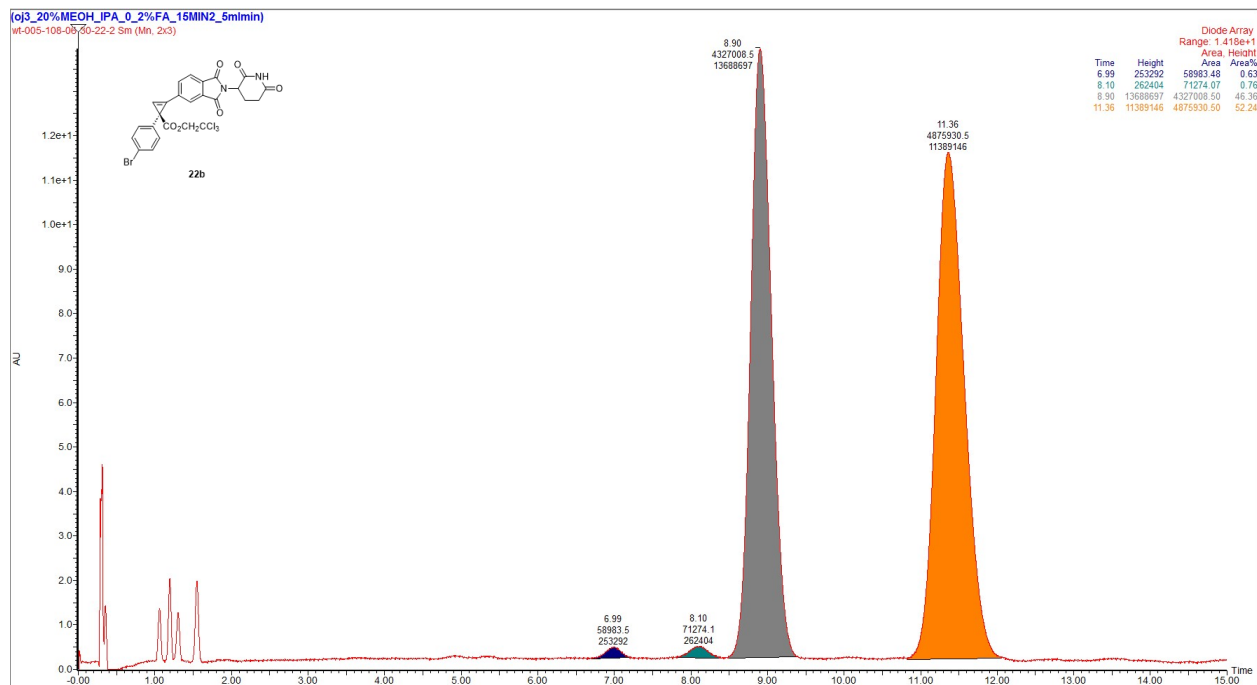

## Racemic Chromatogram, 23

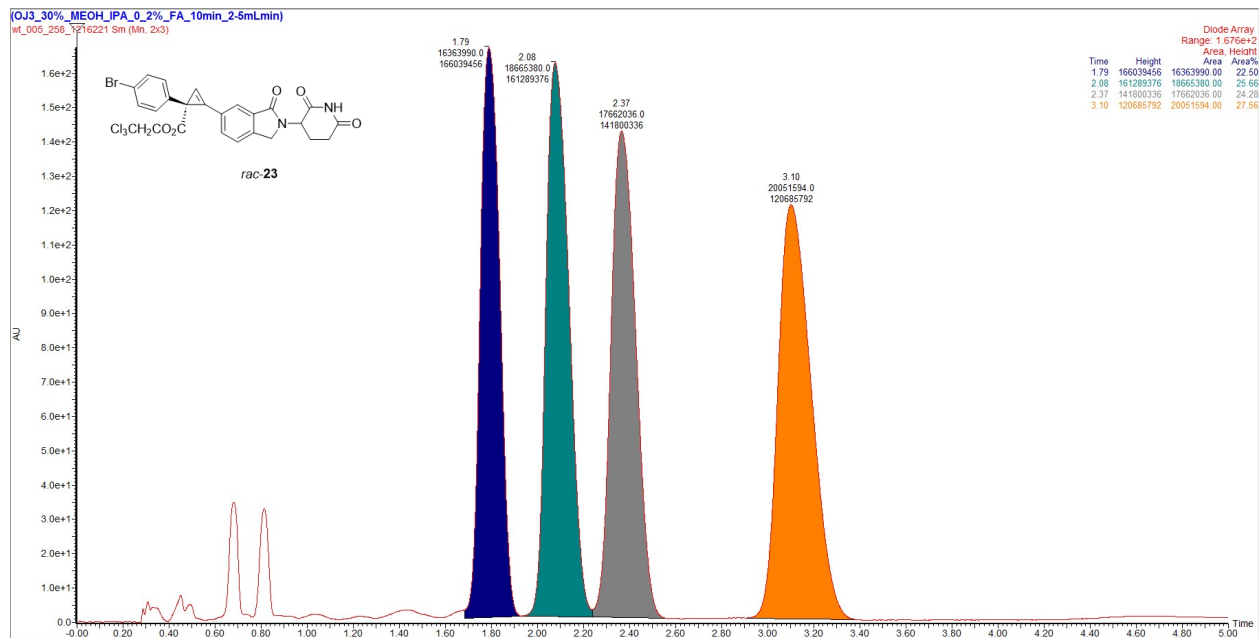

## 23a

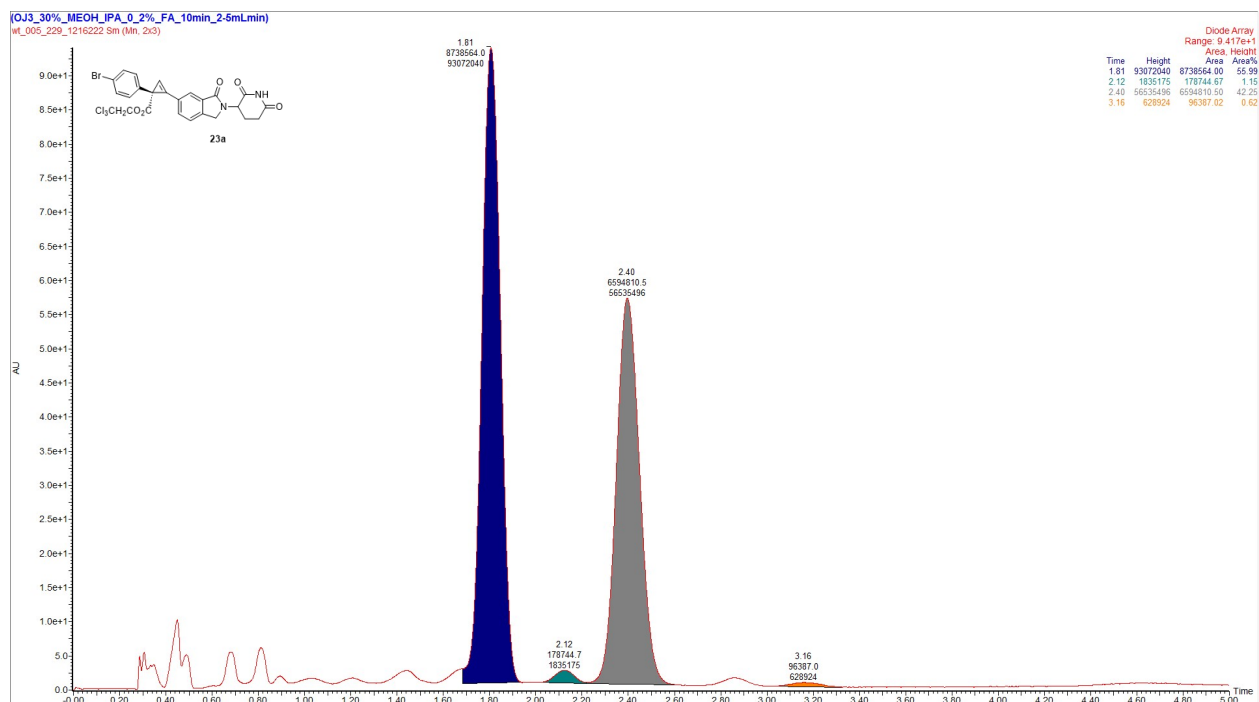

## 23b

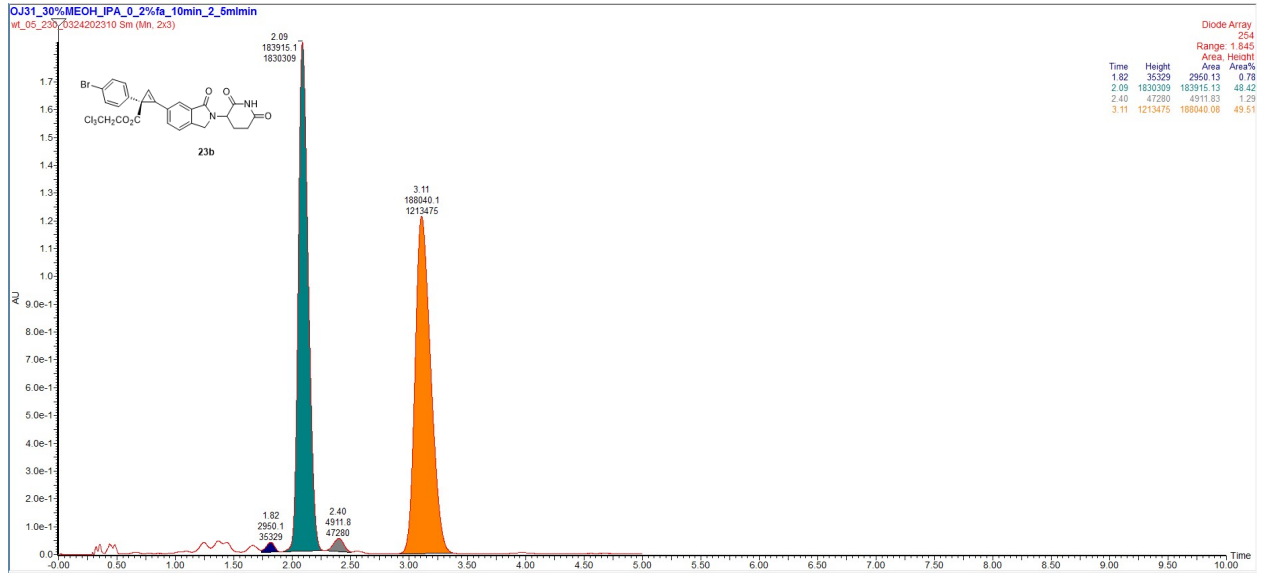

## Racemic Chromatogram, 24

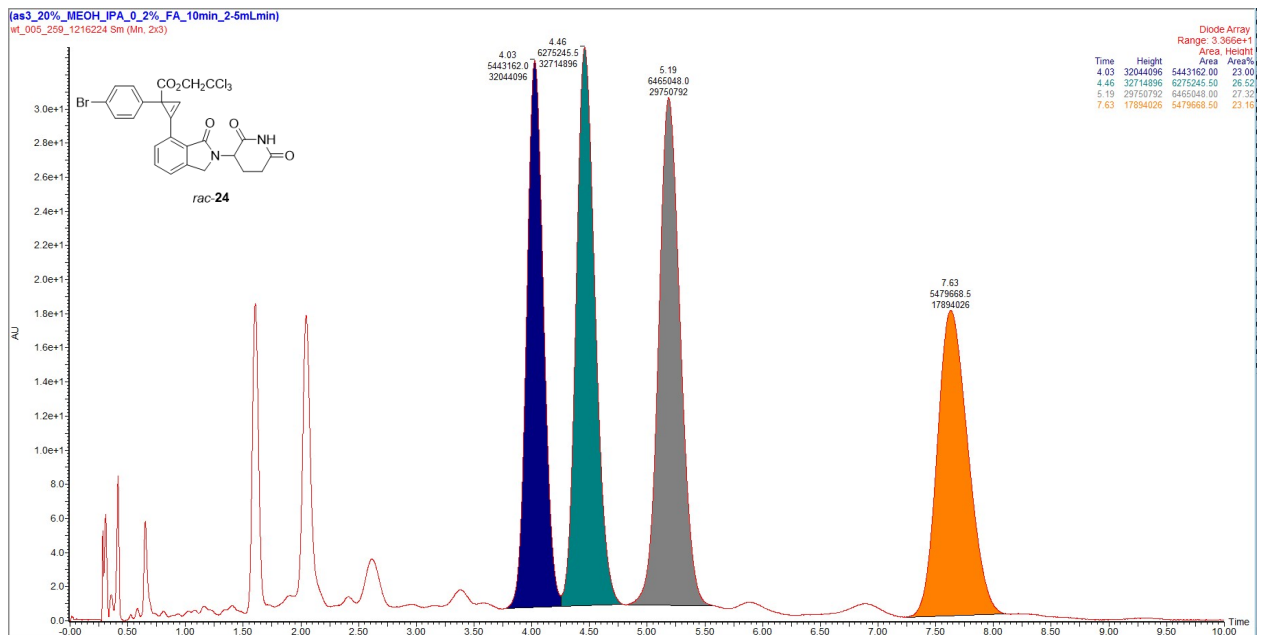

## 24a

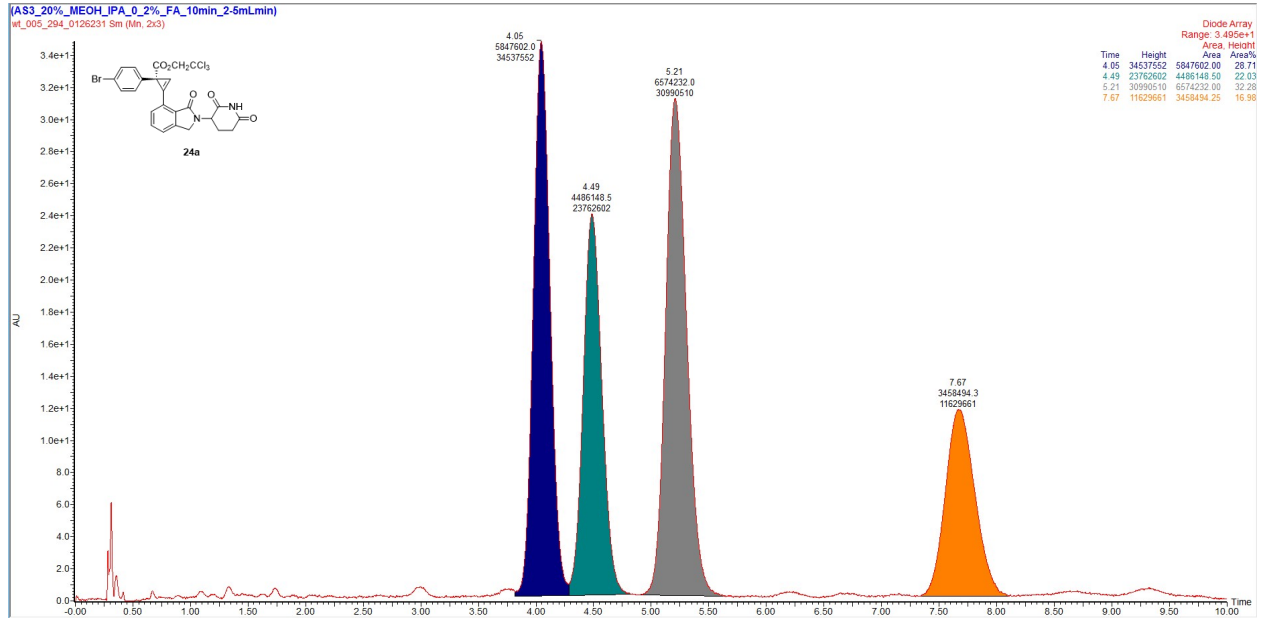

## 24b

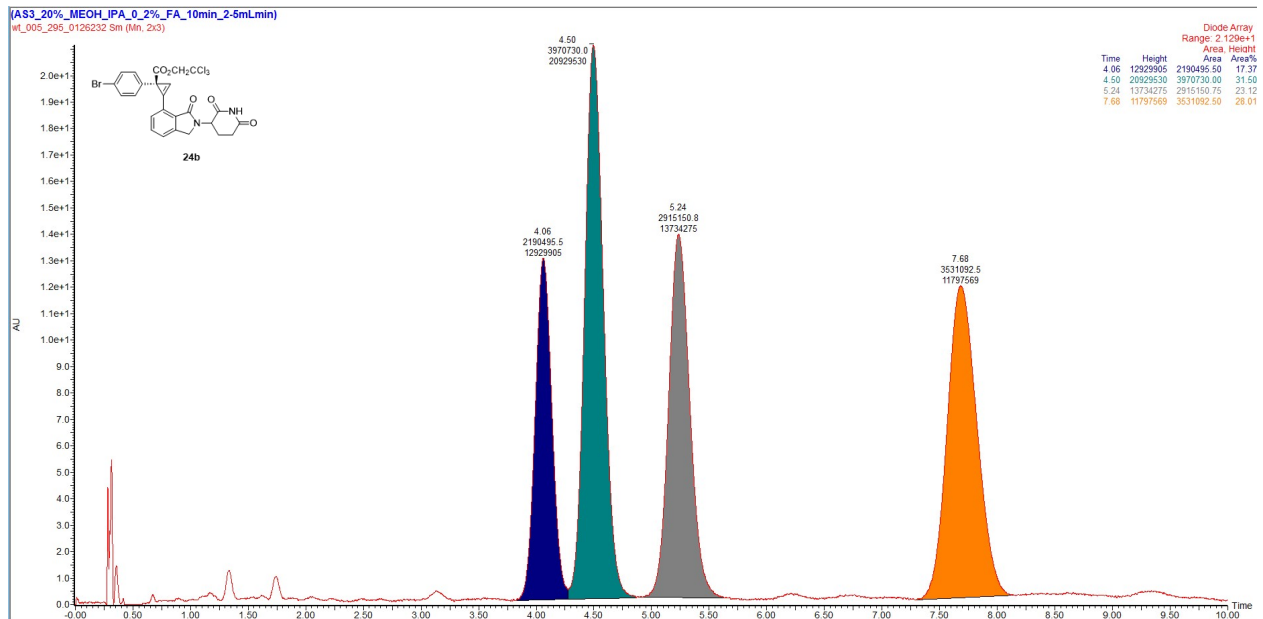

## Racemic Chromatogram, 25

[CEL2\_35%MeOH\_IPA\_0.2%FA\_16min\_2.5mL/min]  
 wt\_05\_519\_151923209 Sm (Mn, 2x3)

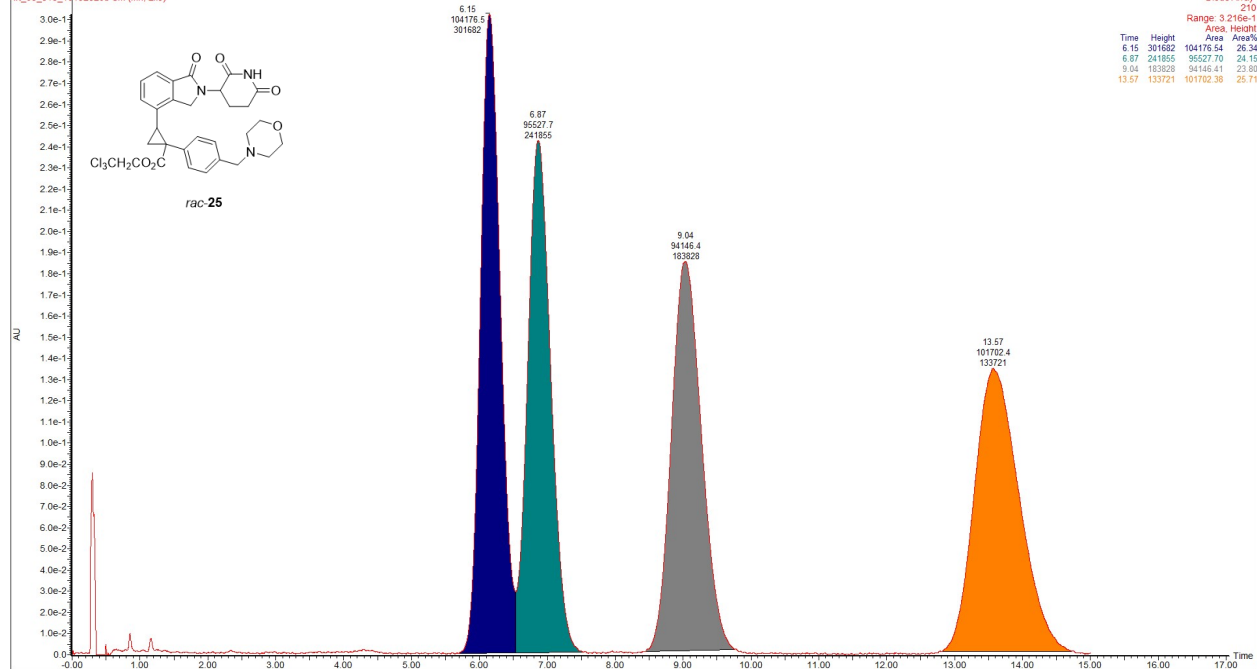

## 25a

[CEL2\_35%MeOH\_IPA\_0.2%FA\_16min\_2.5mL/min]  
 wt\_05\_563\_0419241 Sm (Mn, 2x3)

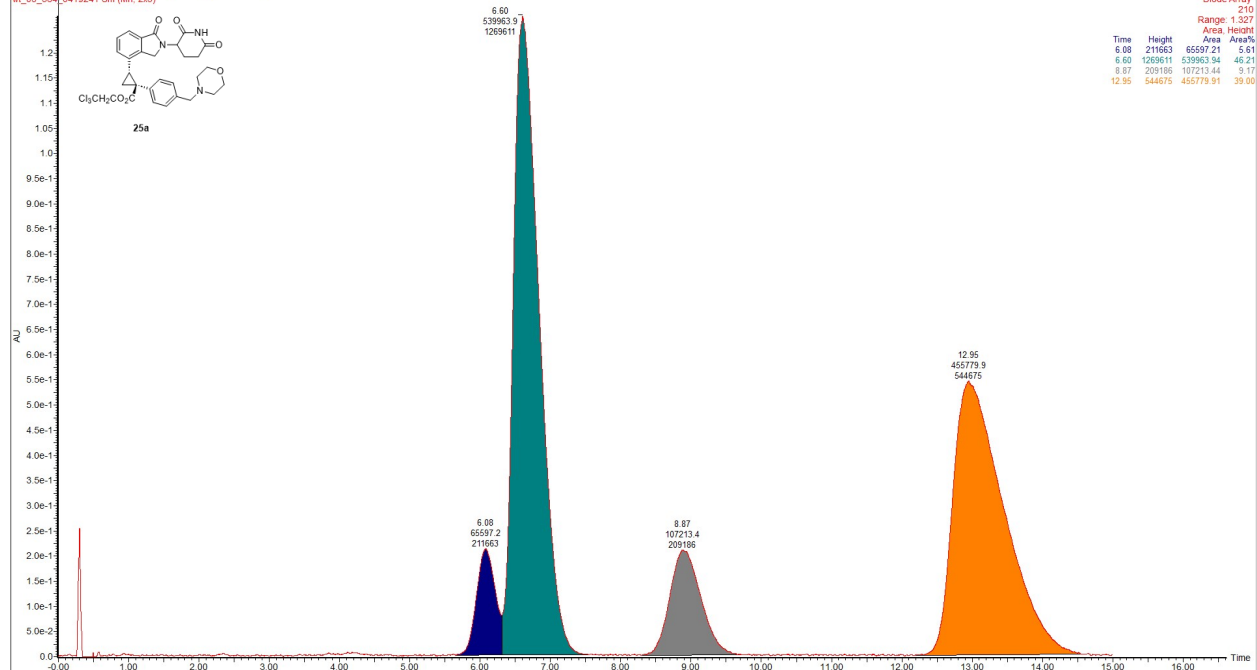

## 25b

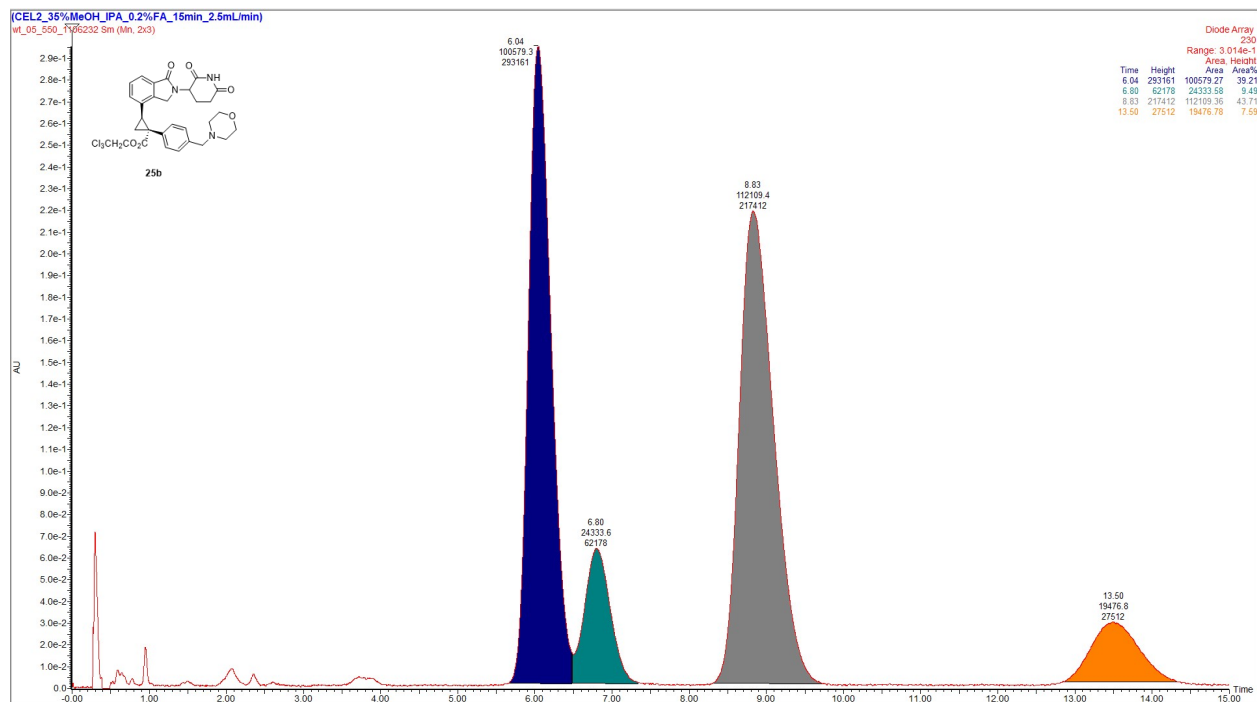

## Racemic Chromatogram, 26

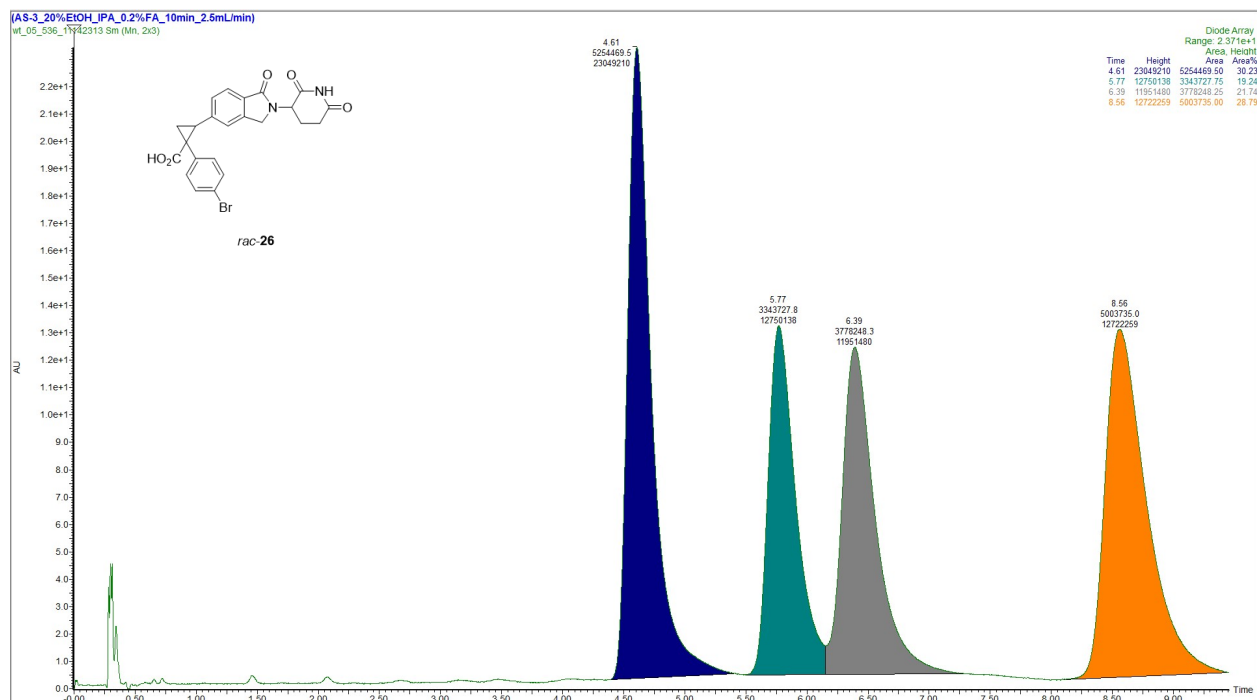

### 26a

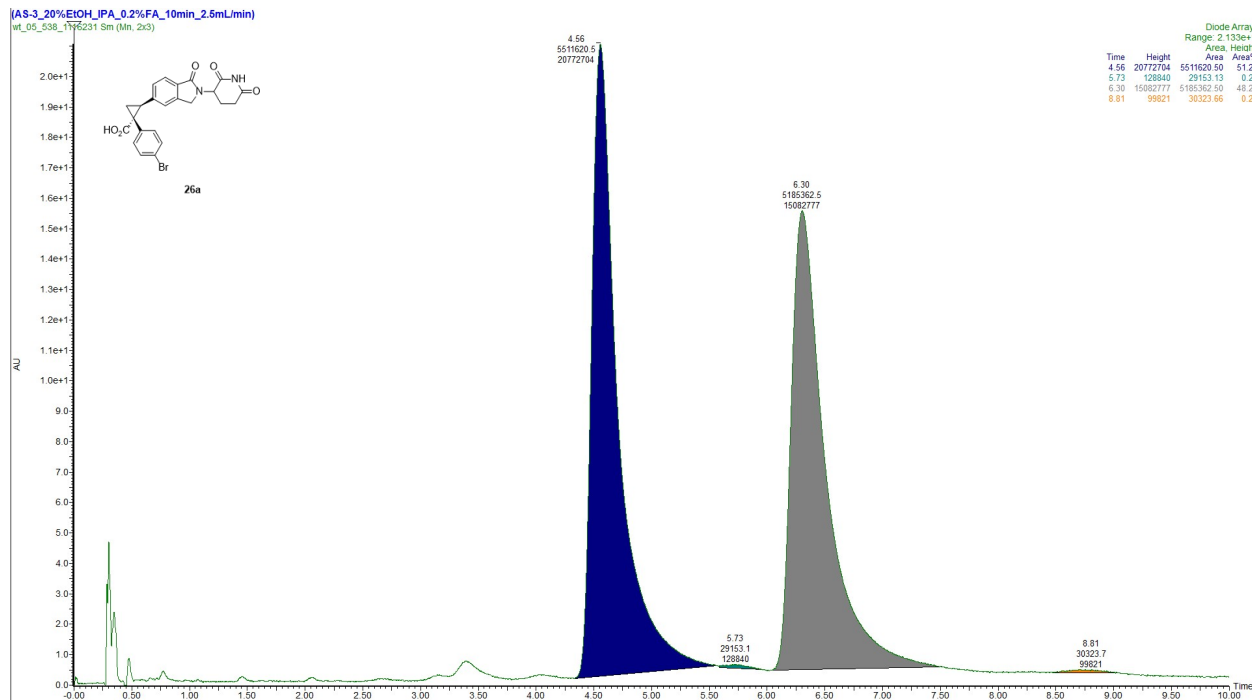

### 26b

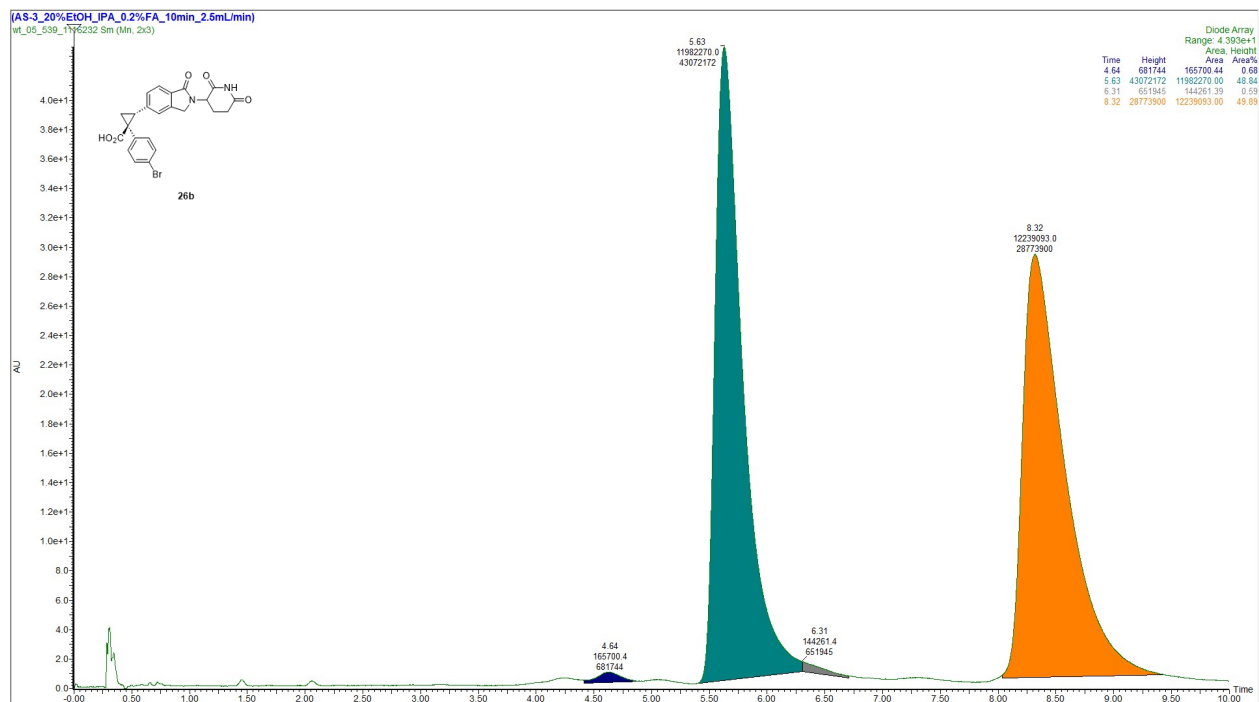

# Racemic Chromatogram, 27

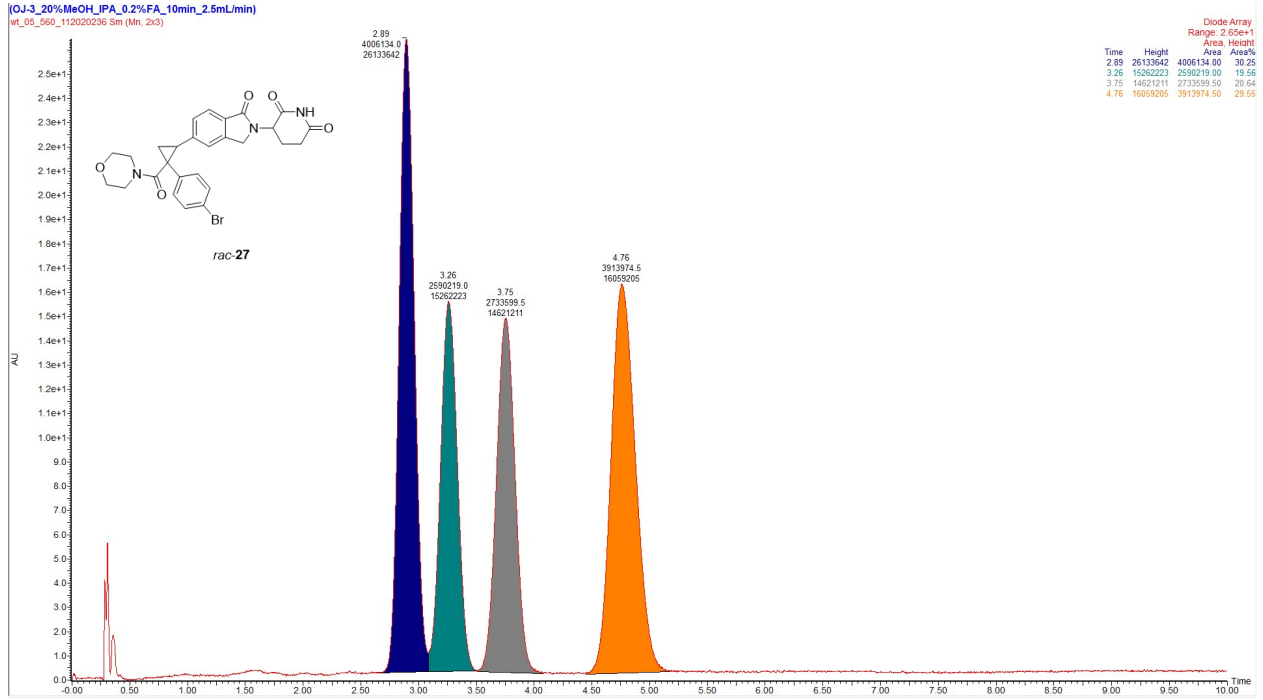

# 27a

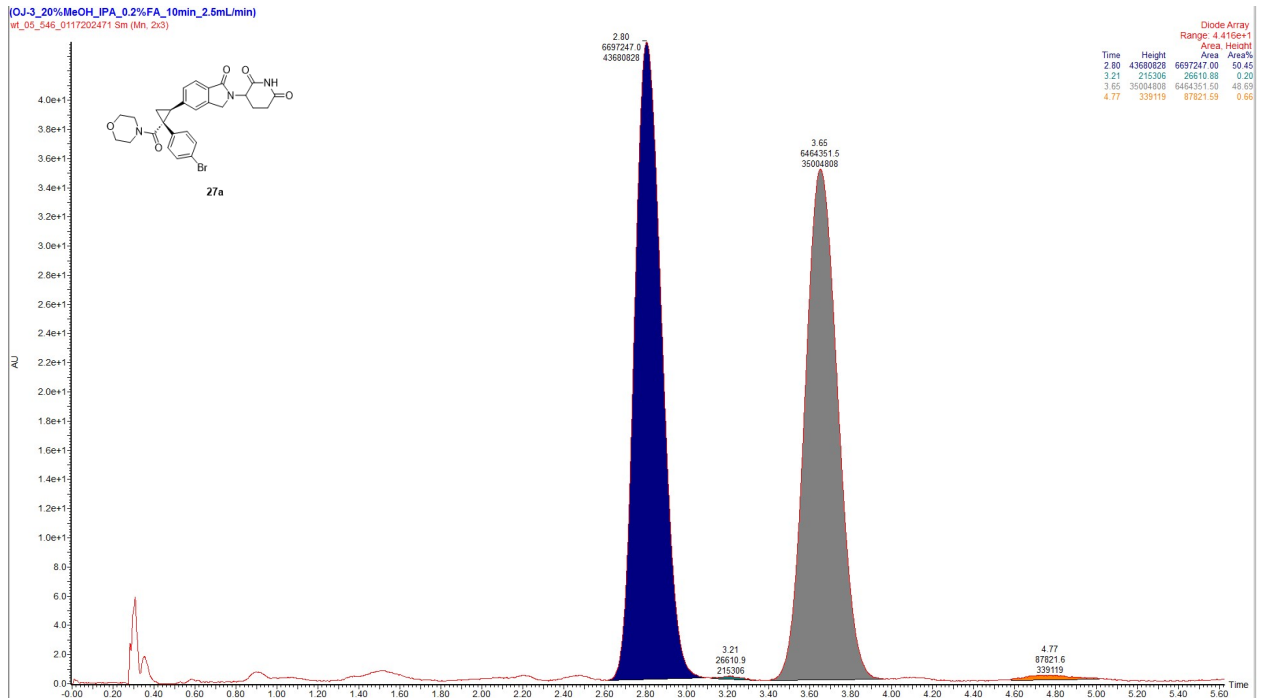



## 27b

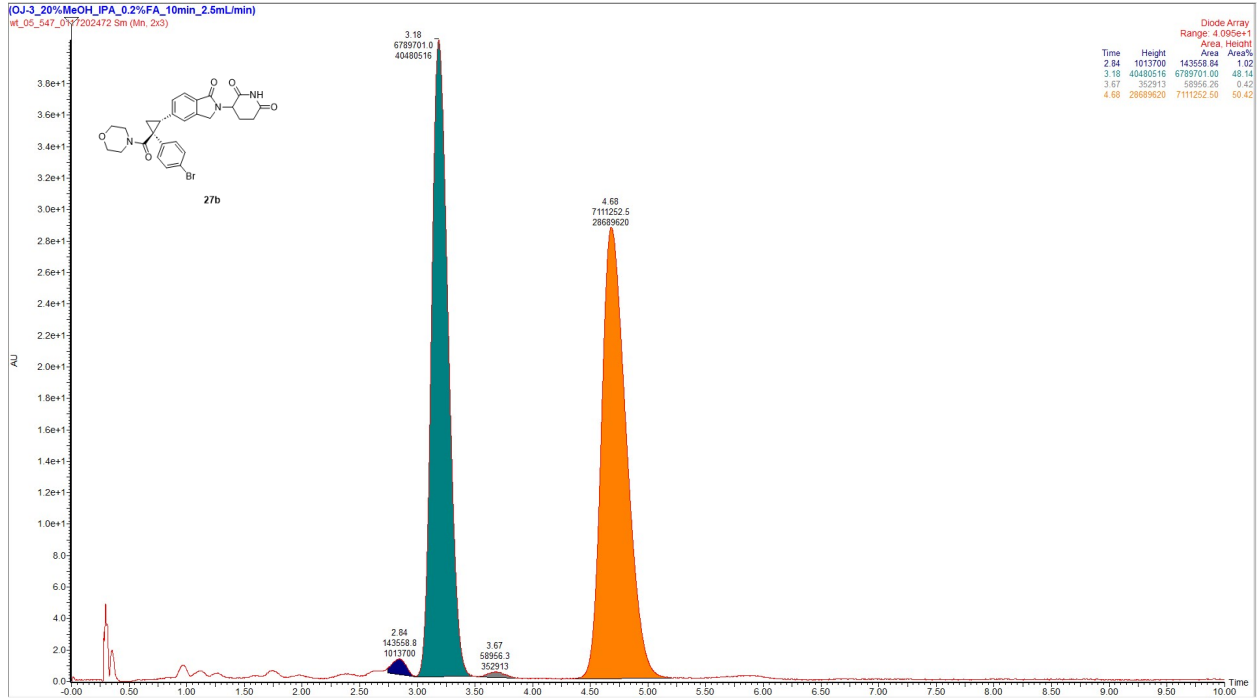

## Purity Chromatograms 13a

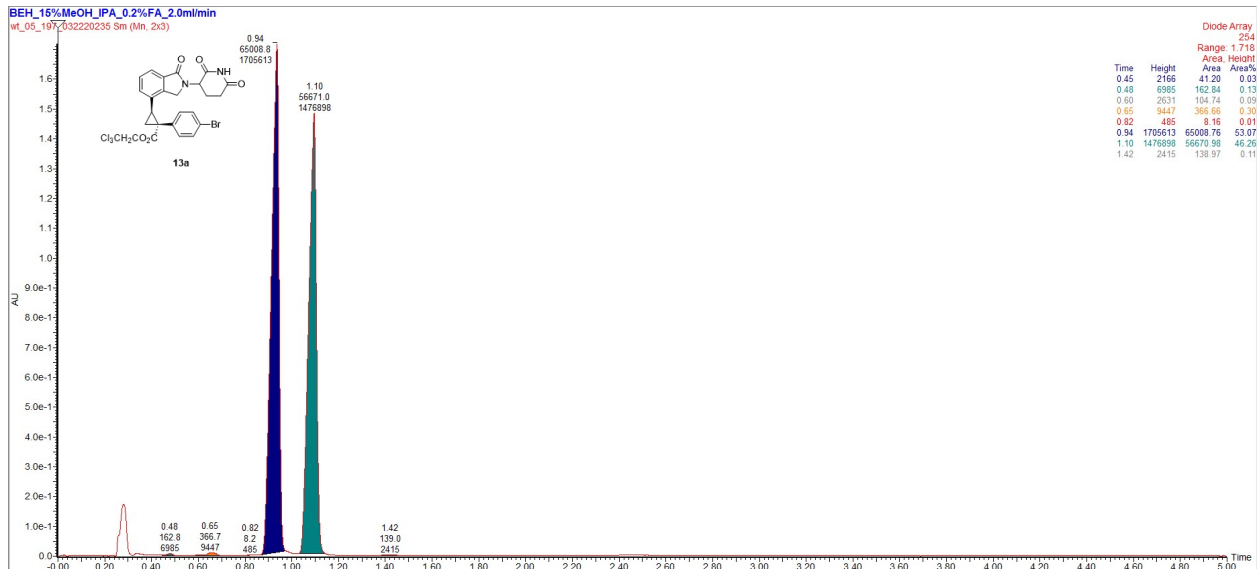

# 13b

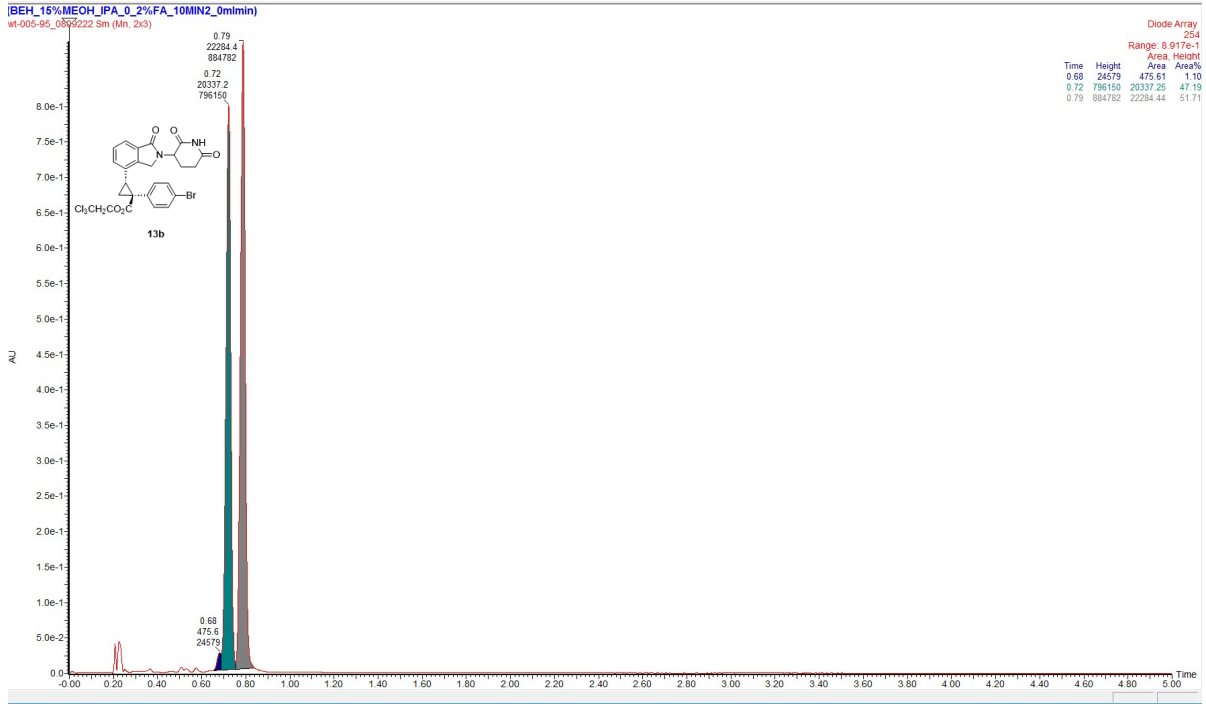

# 14a

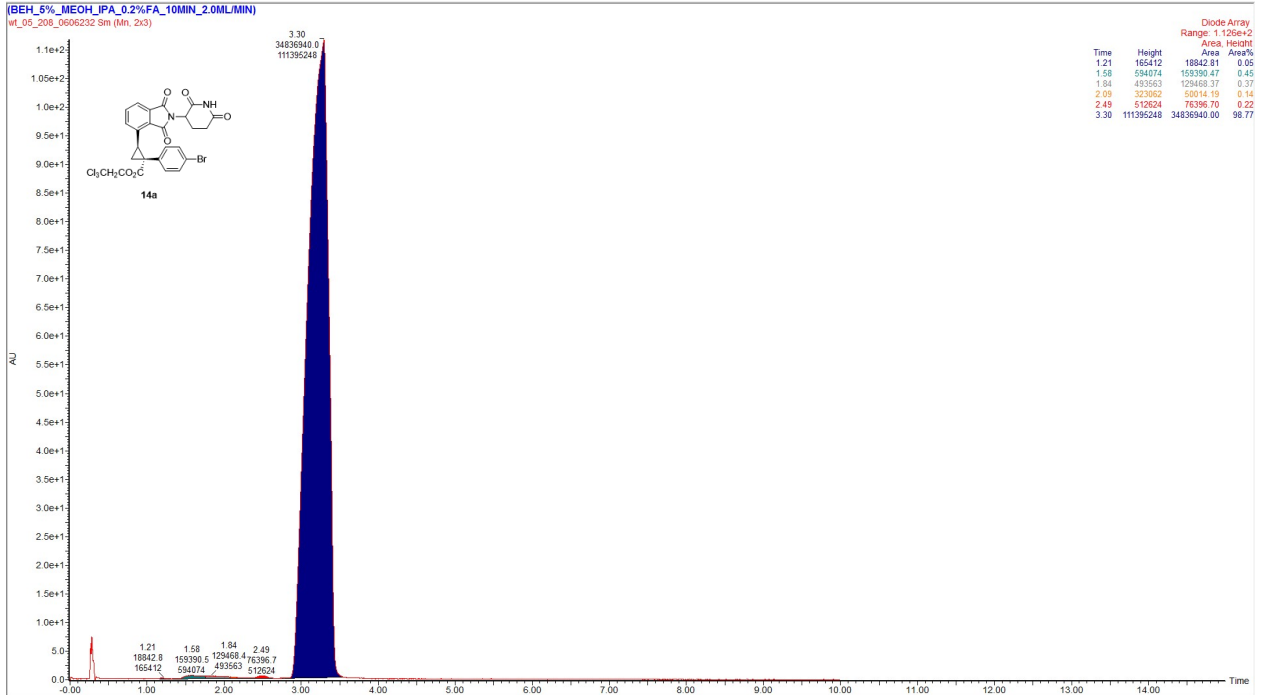

# 14b

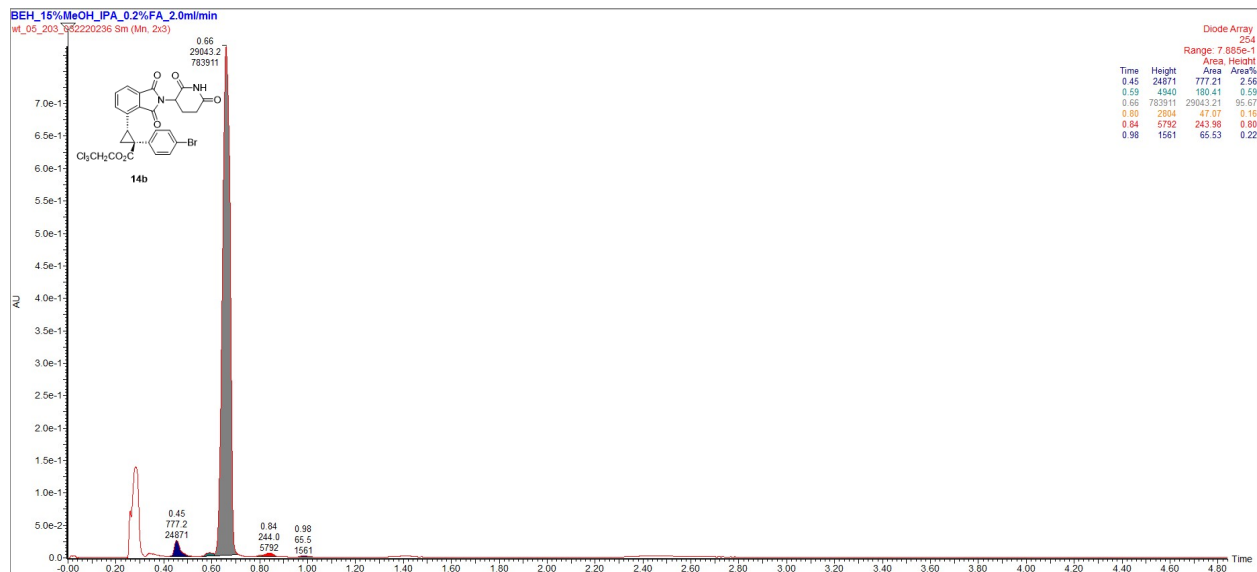

# 15a

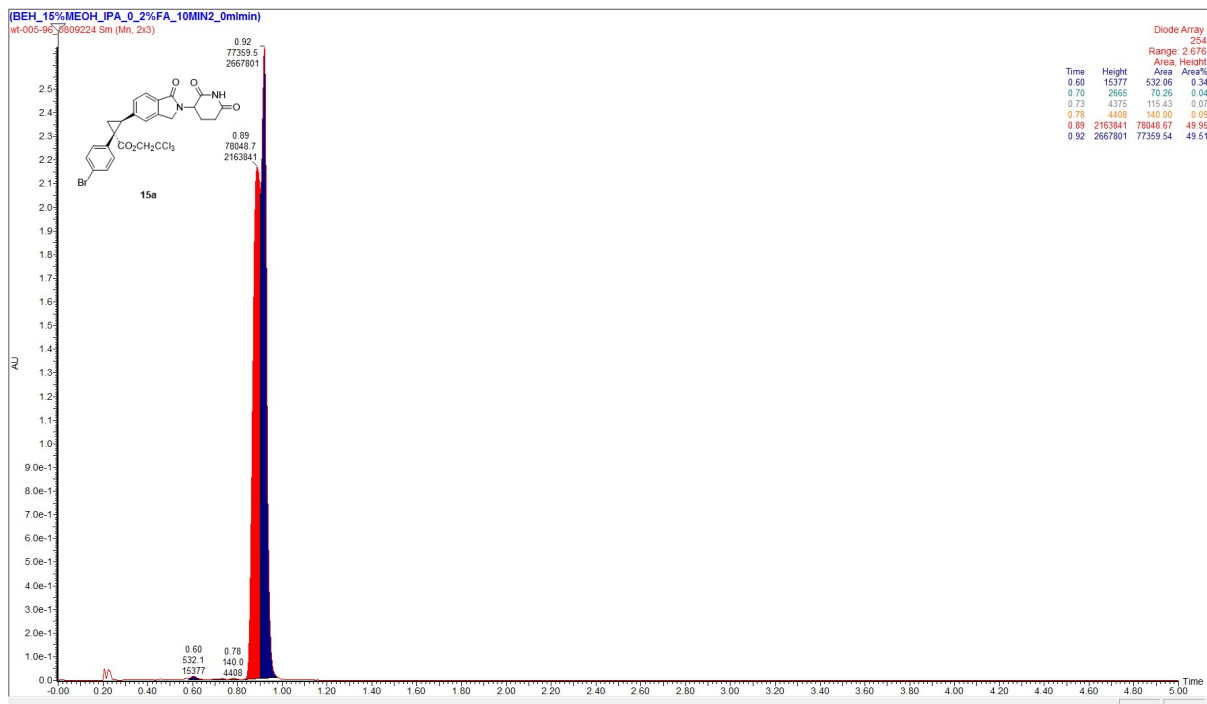

# 15b

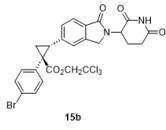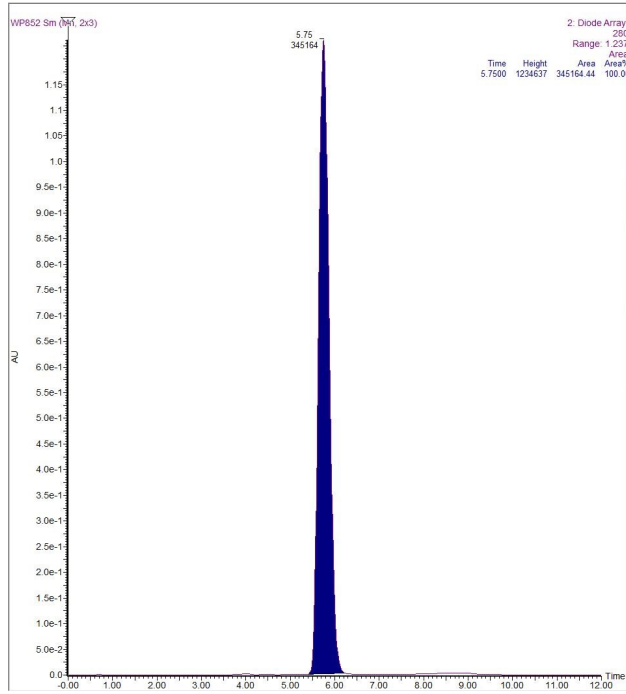

# S-15a

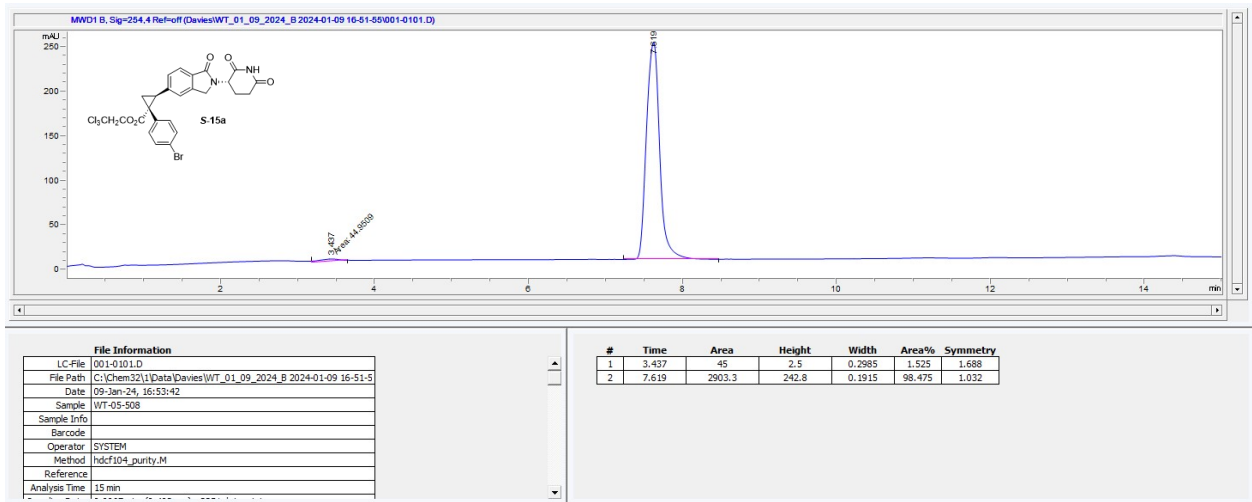

## S-15b

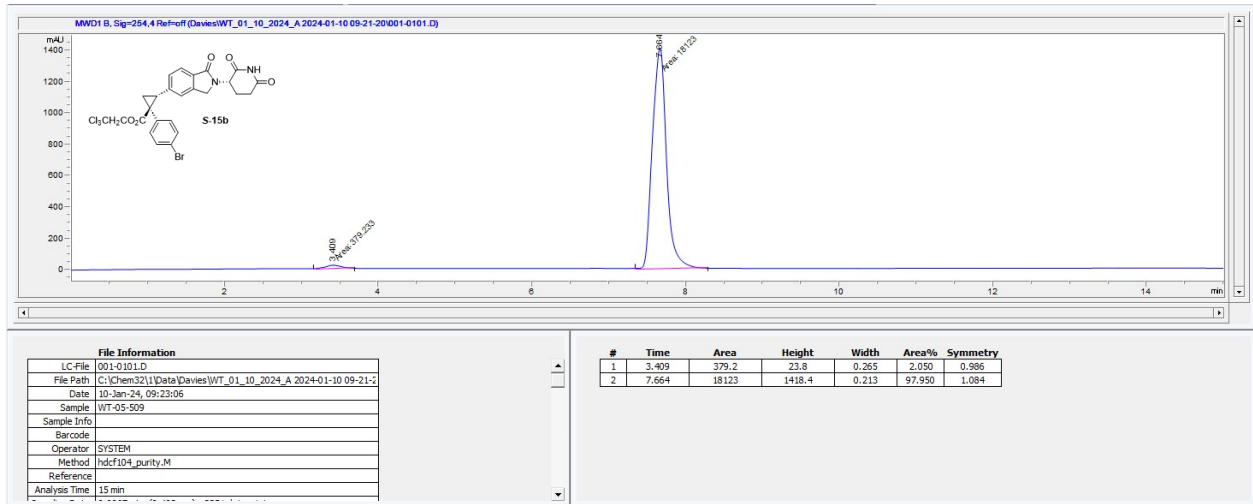

## R-15a

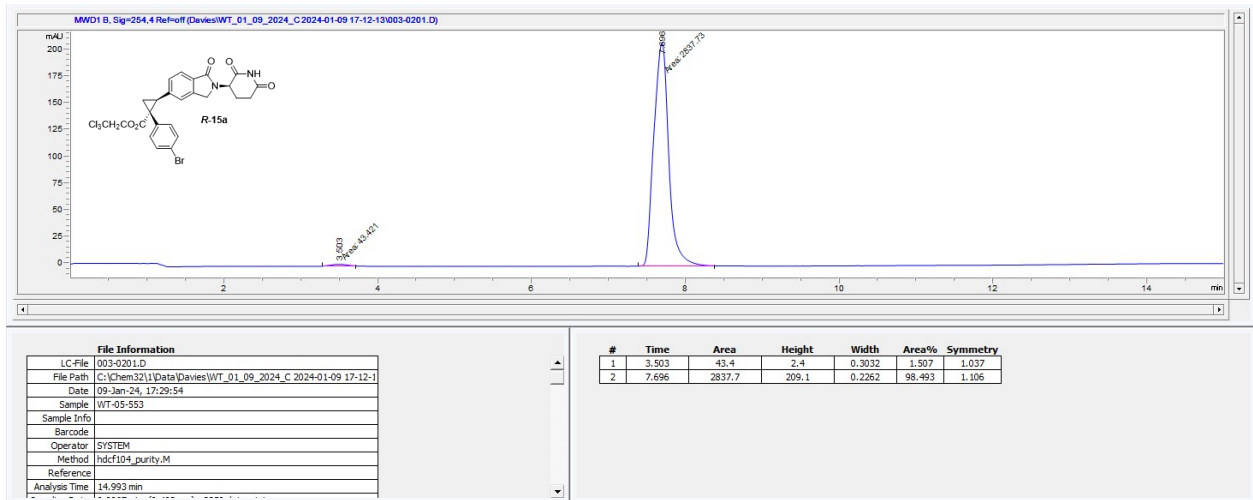

# R-15b

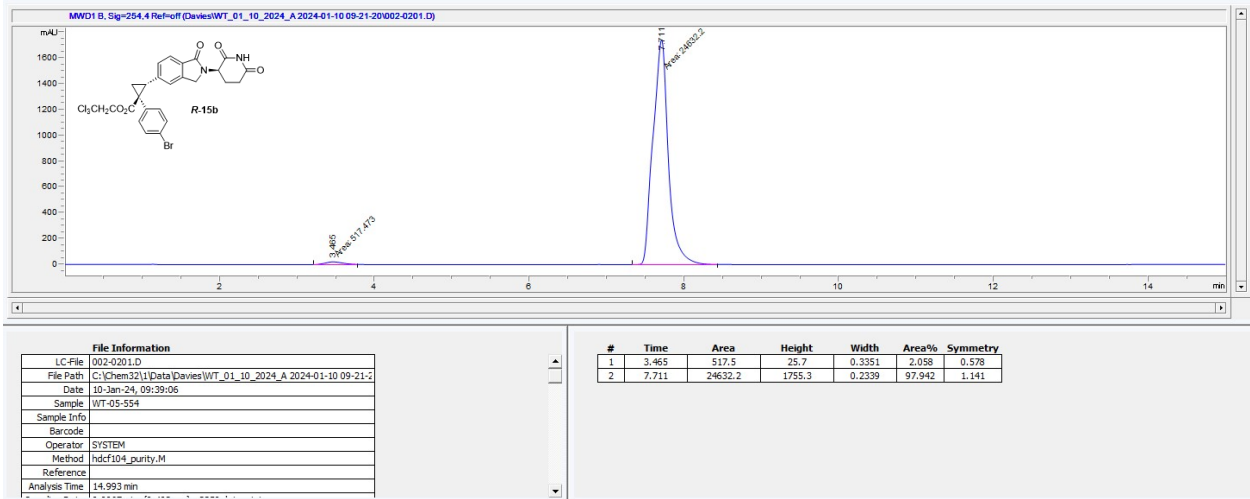

# 16a

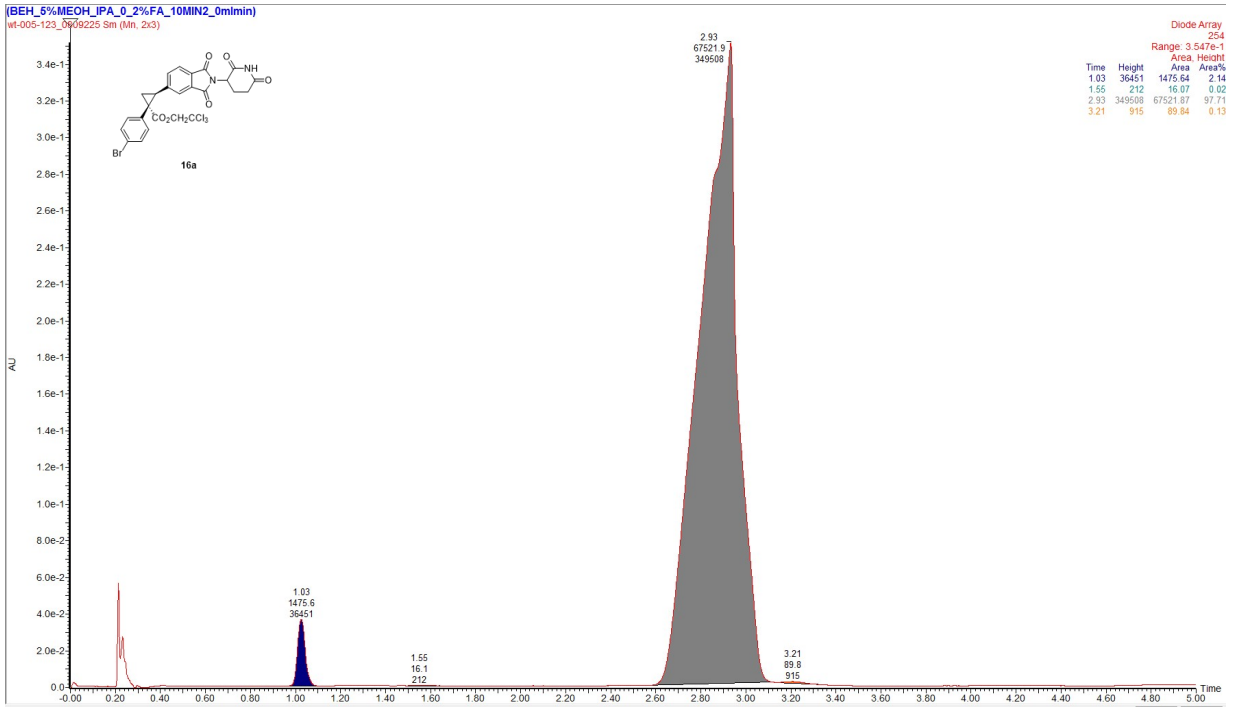

16b

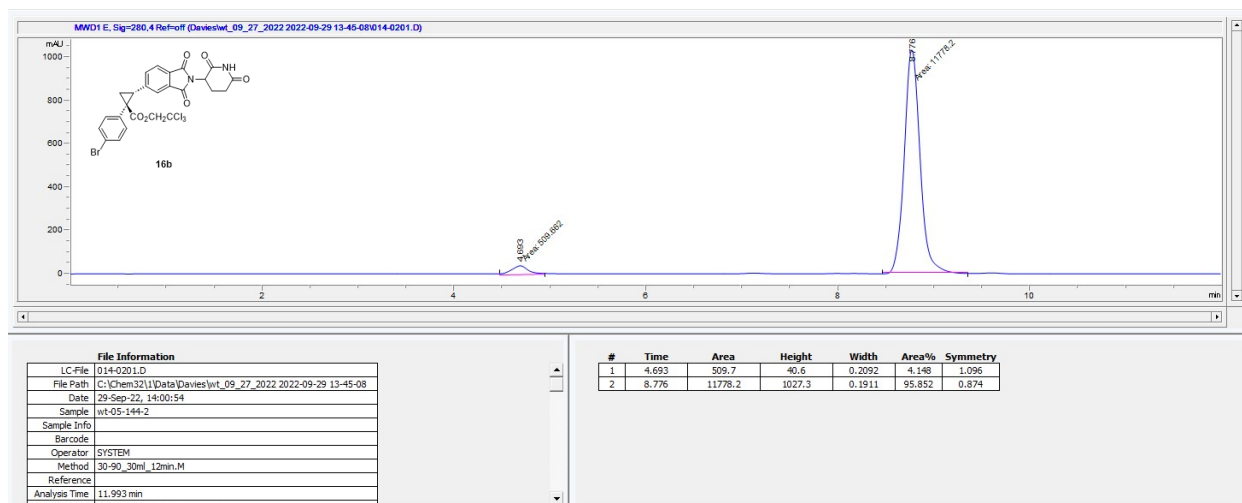

17a

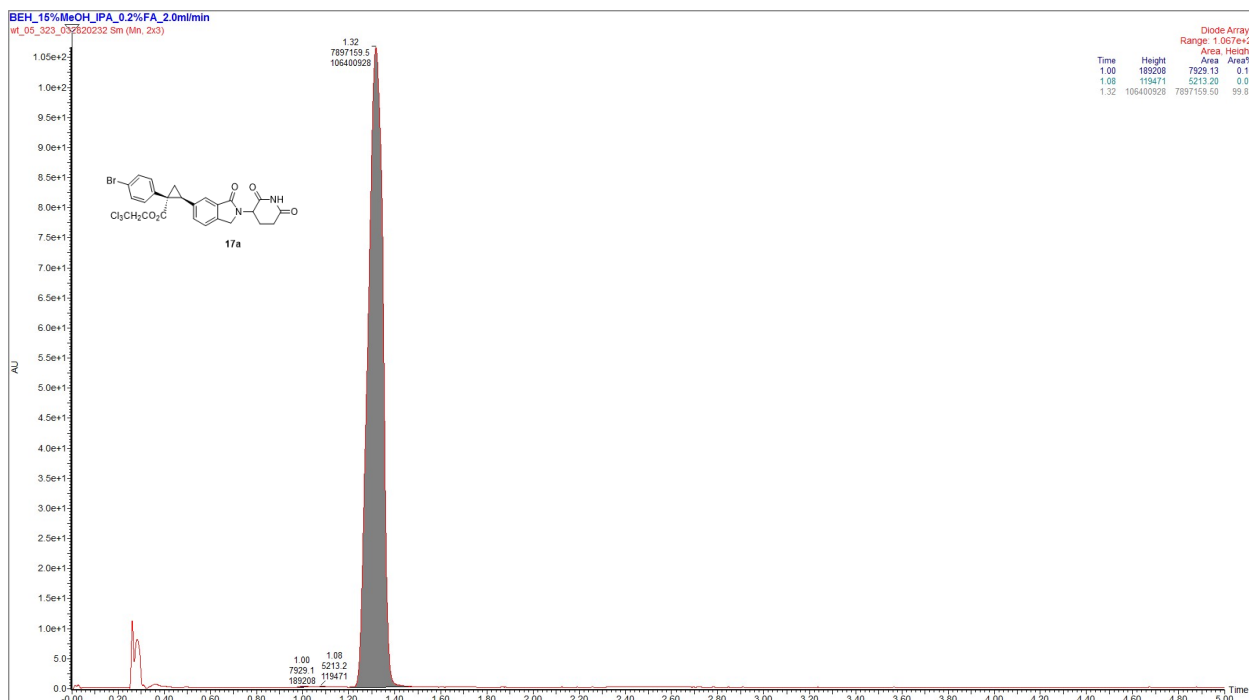

# 17b

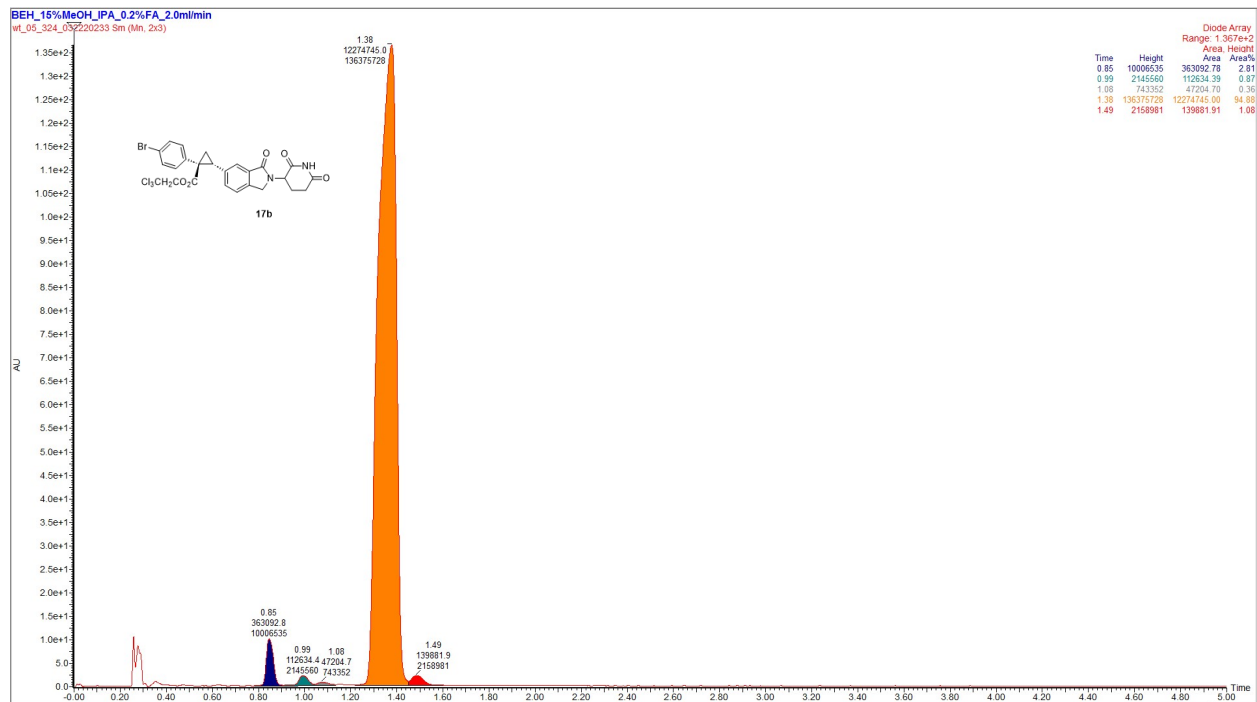

# 18a

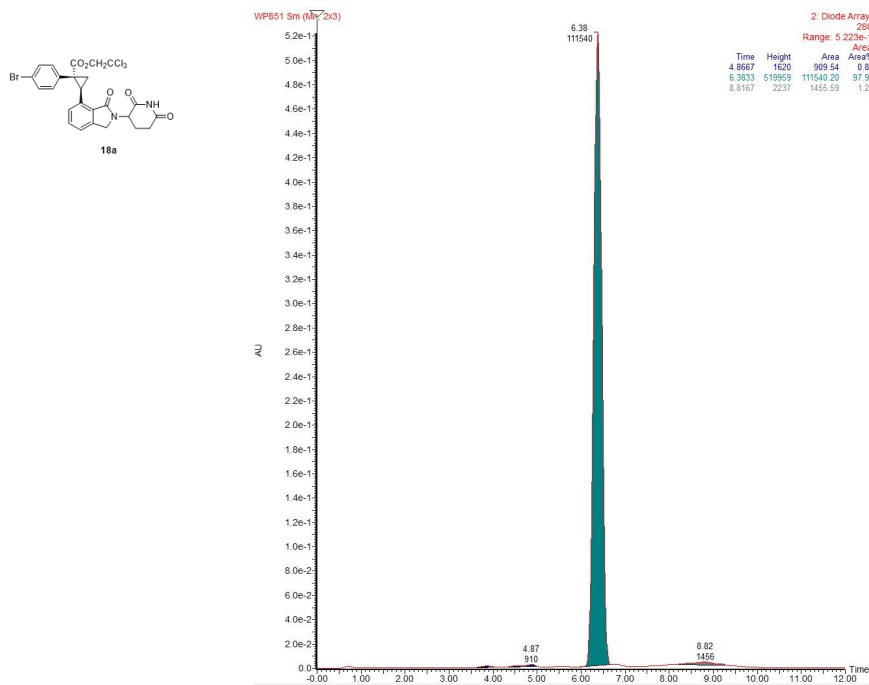



# 18b

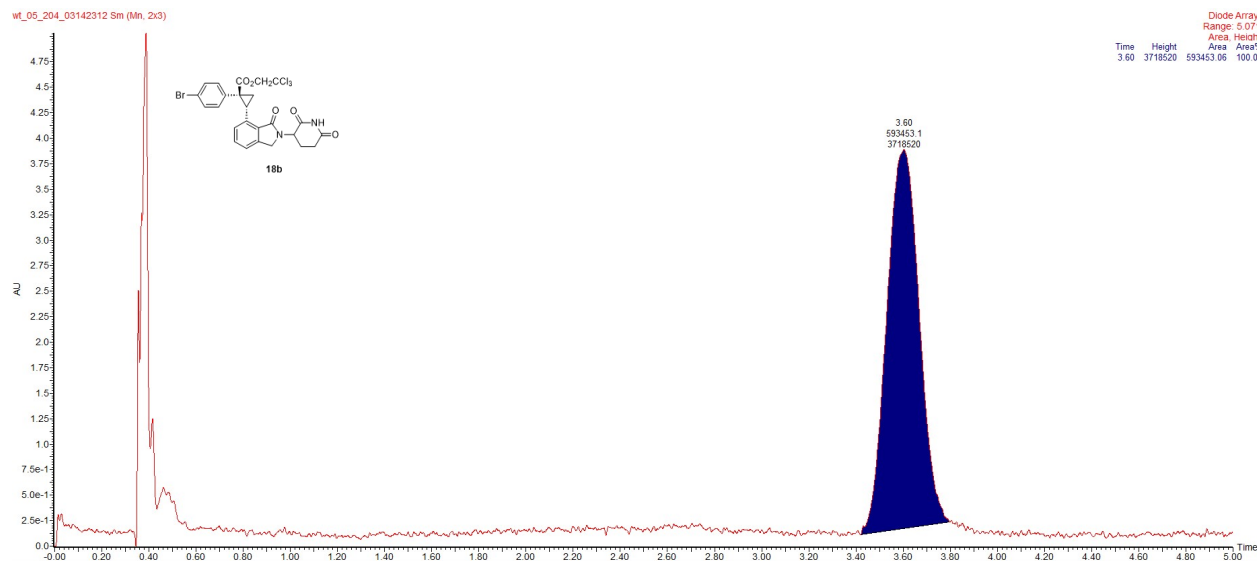

# 19a

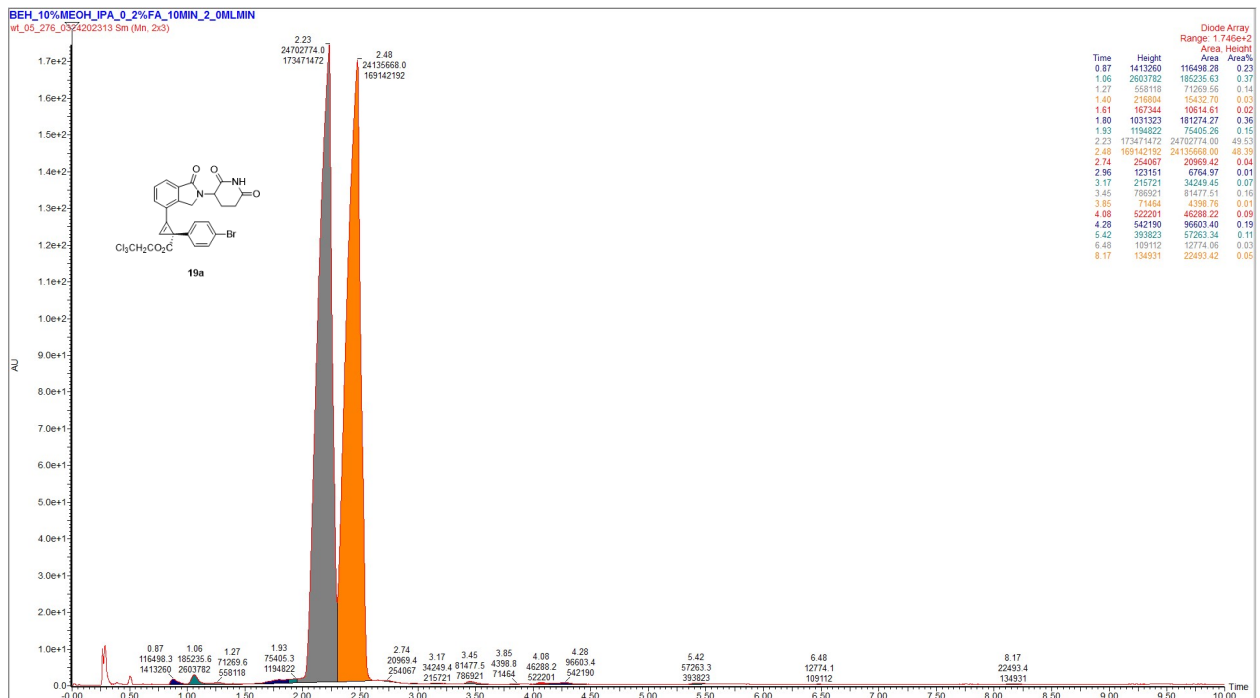

# 19b

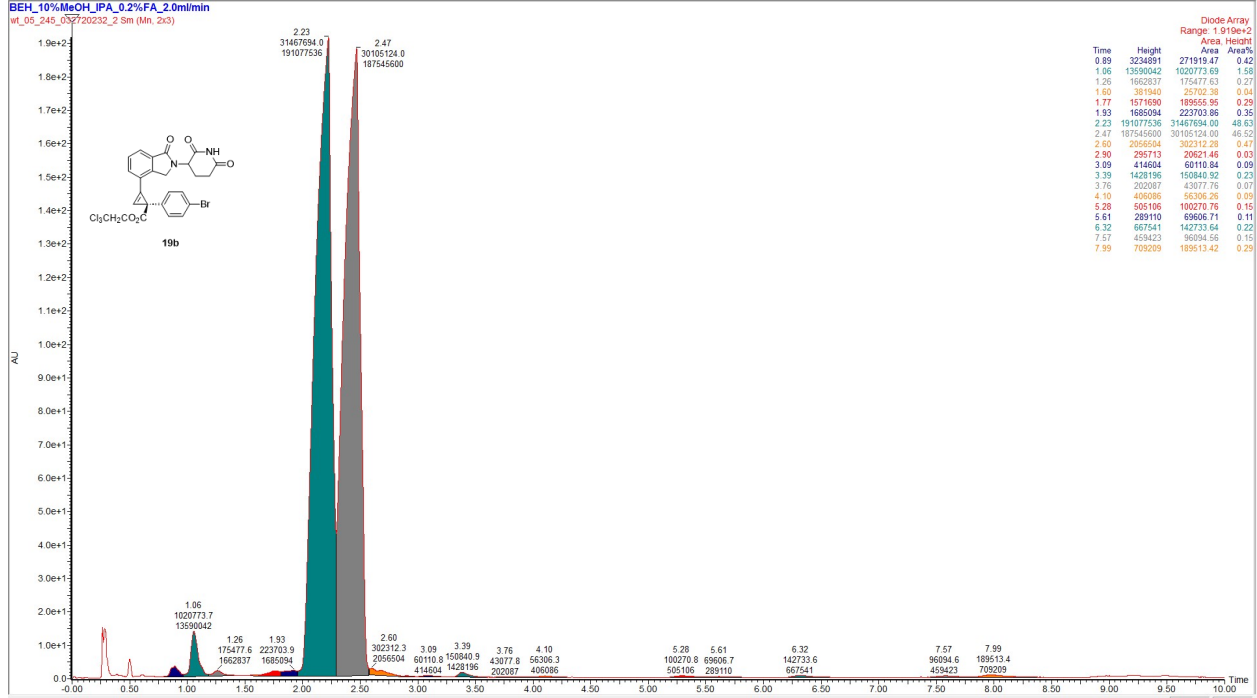

# 20a

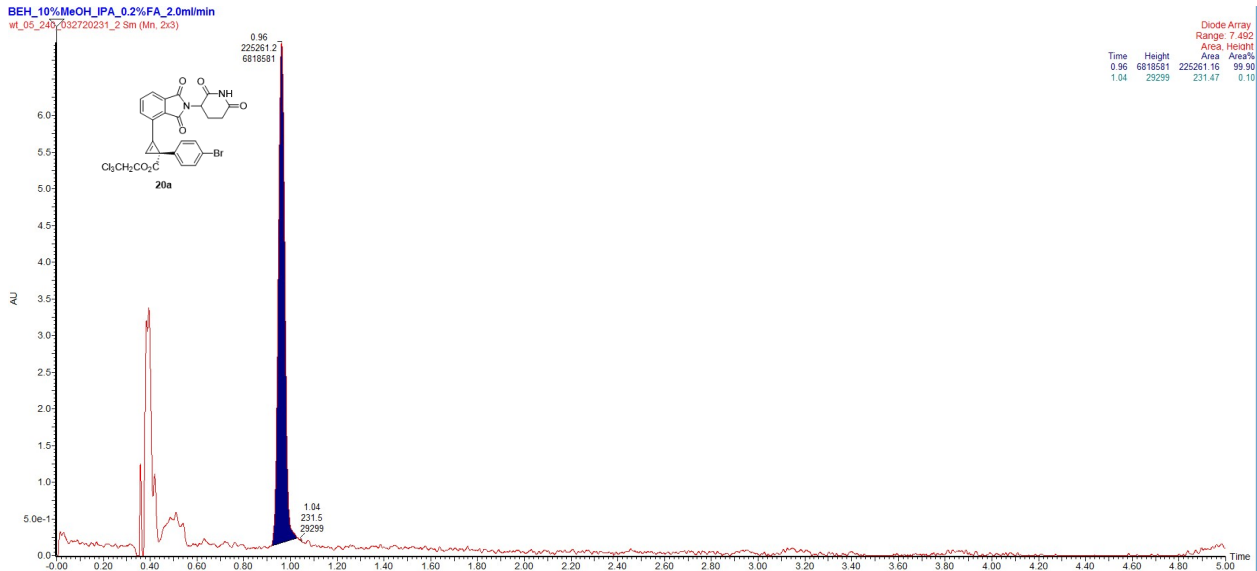

20b

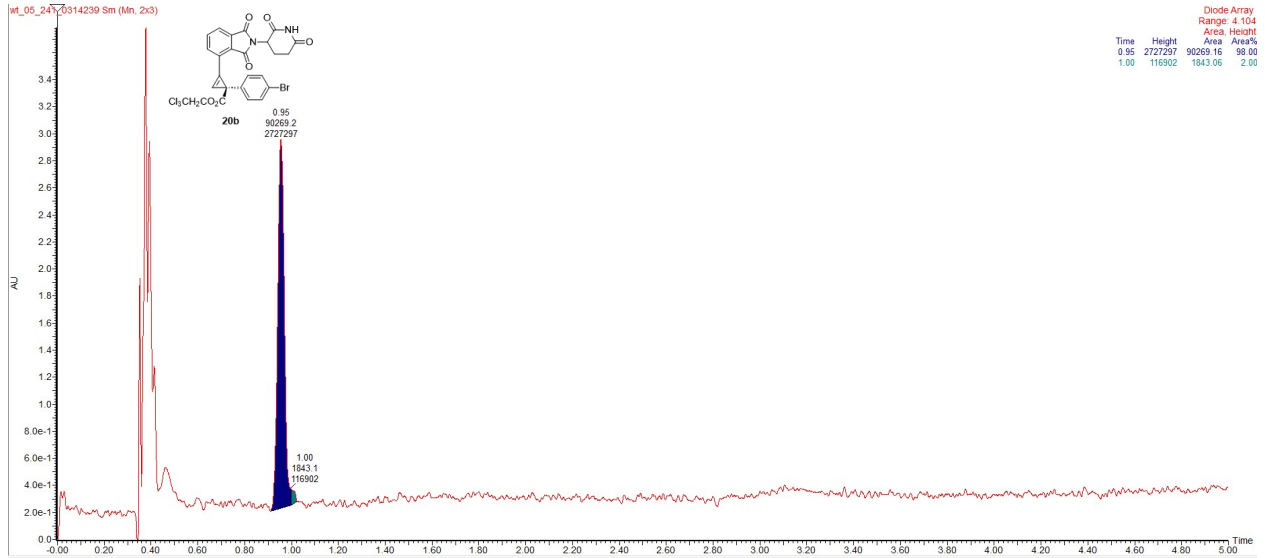

21a

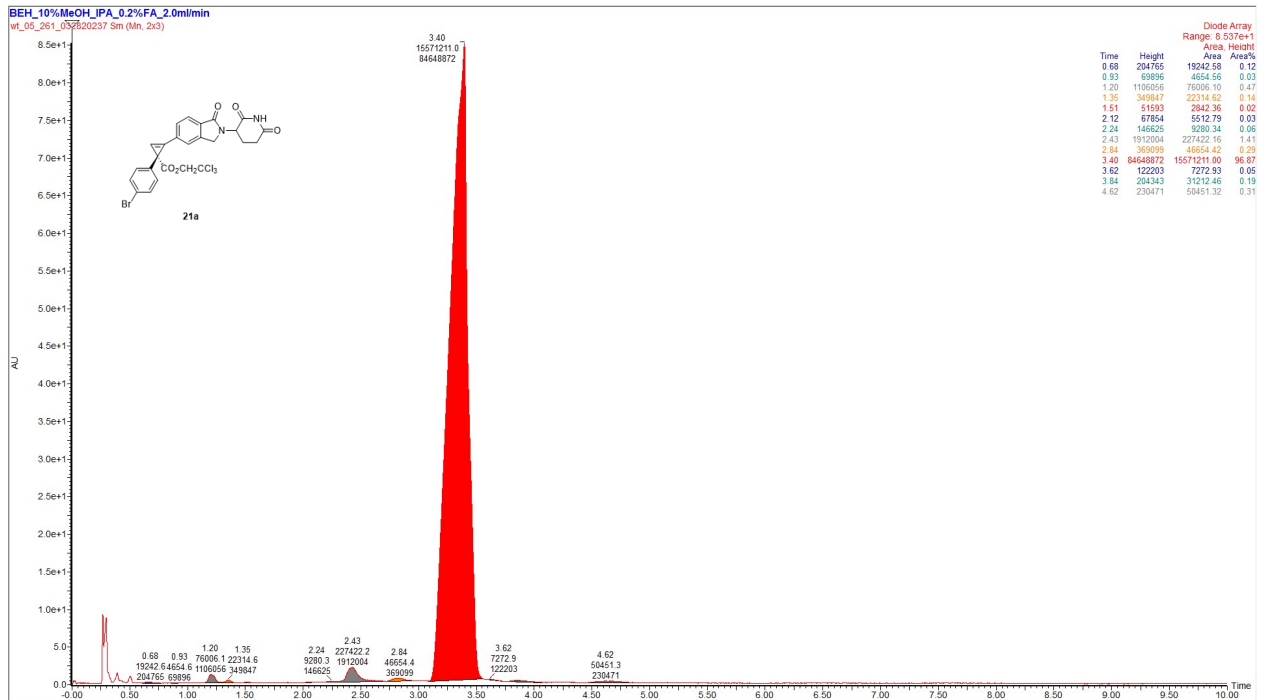

## 21b

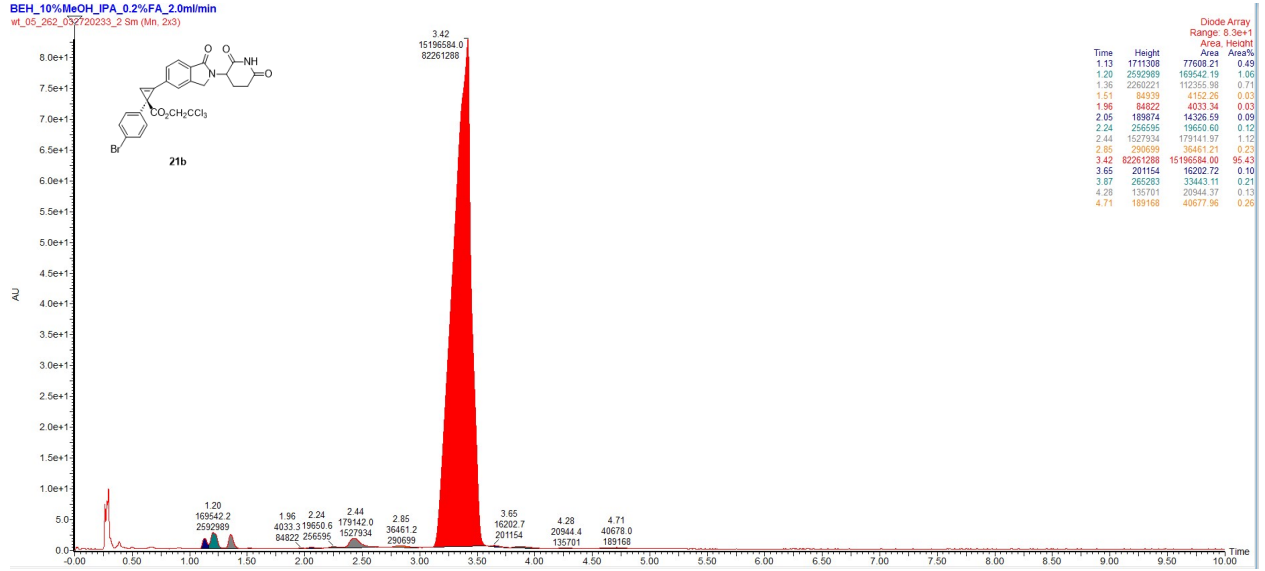

## 22a

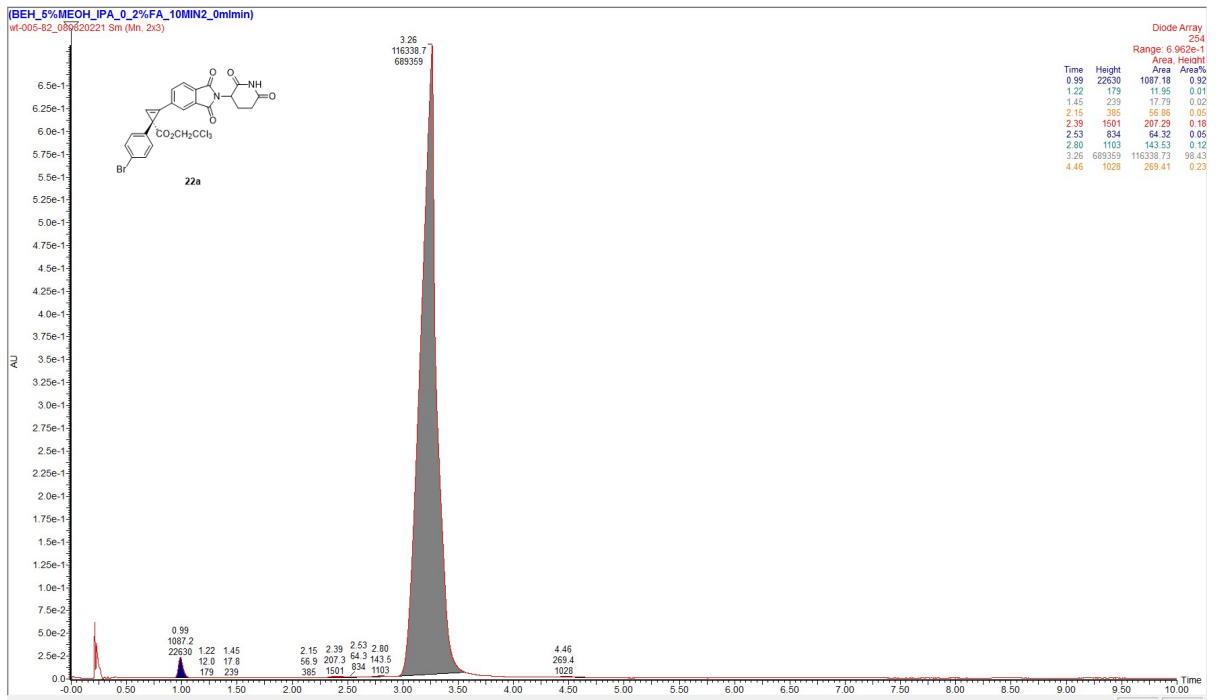

22b

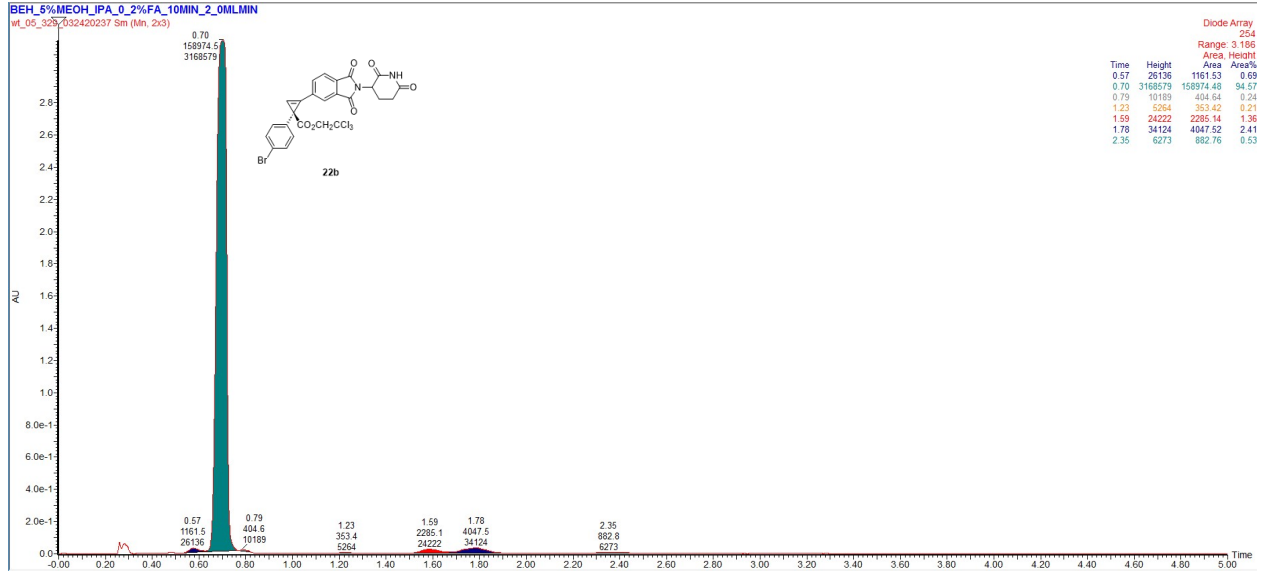

23a

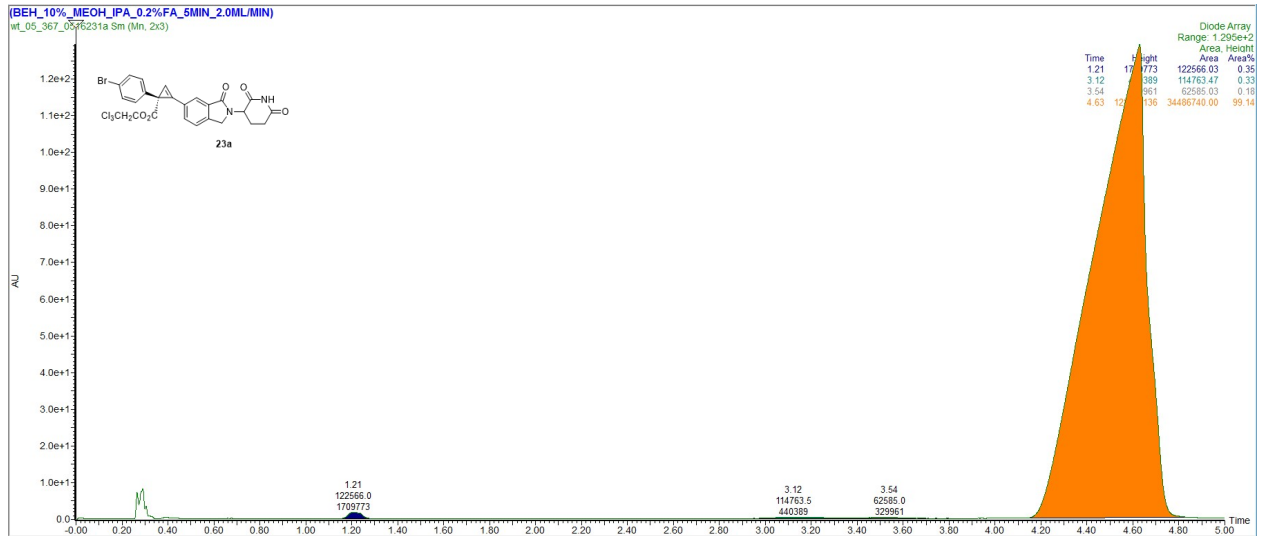

## 23b

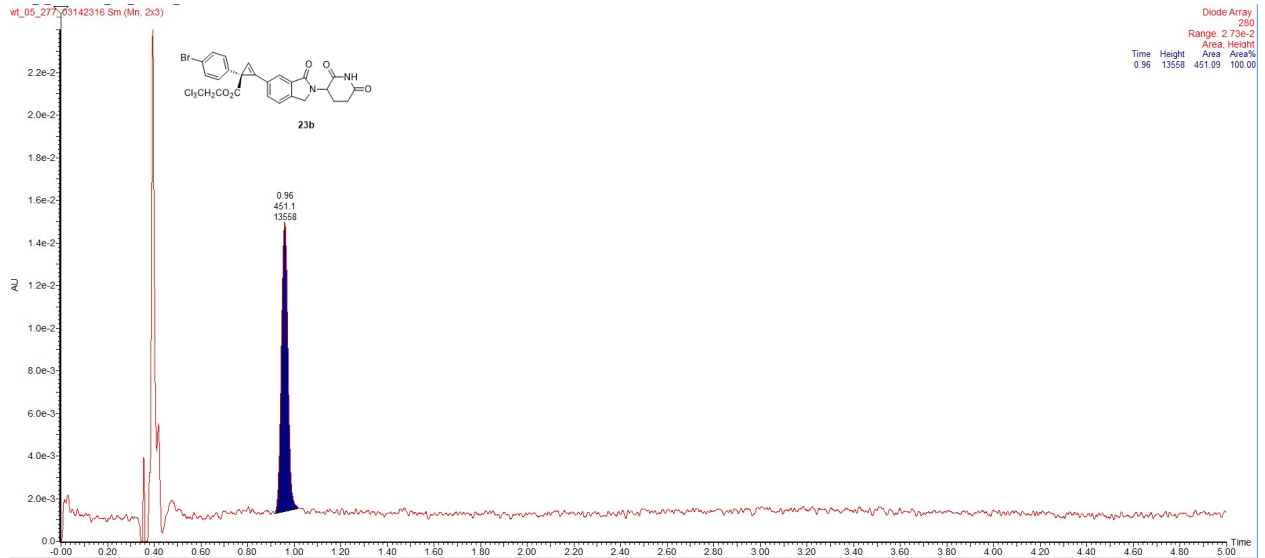

## 24a

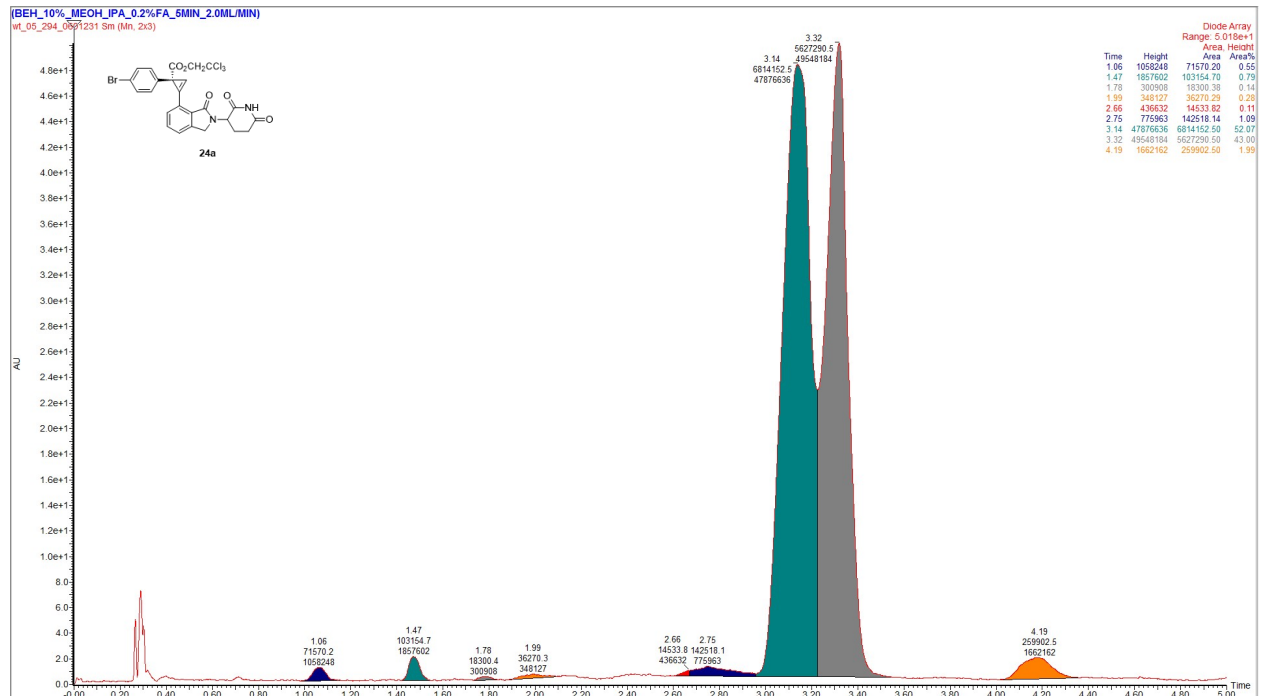

## 24b

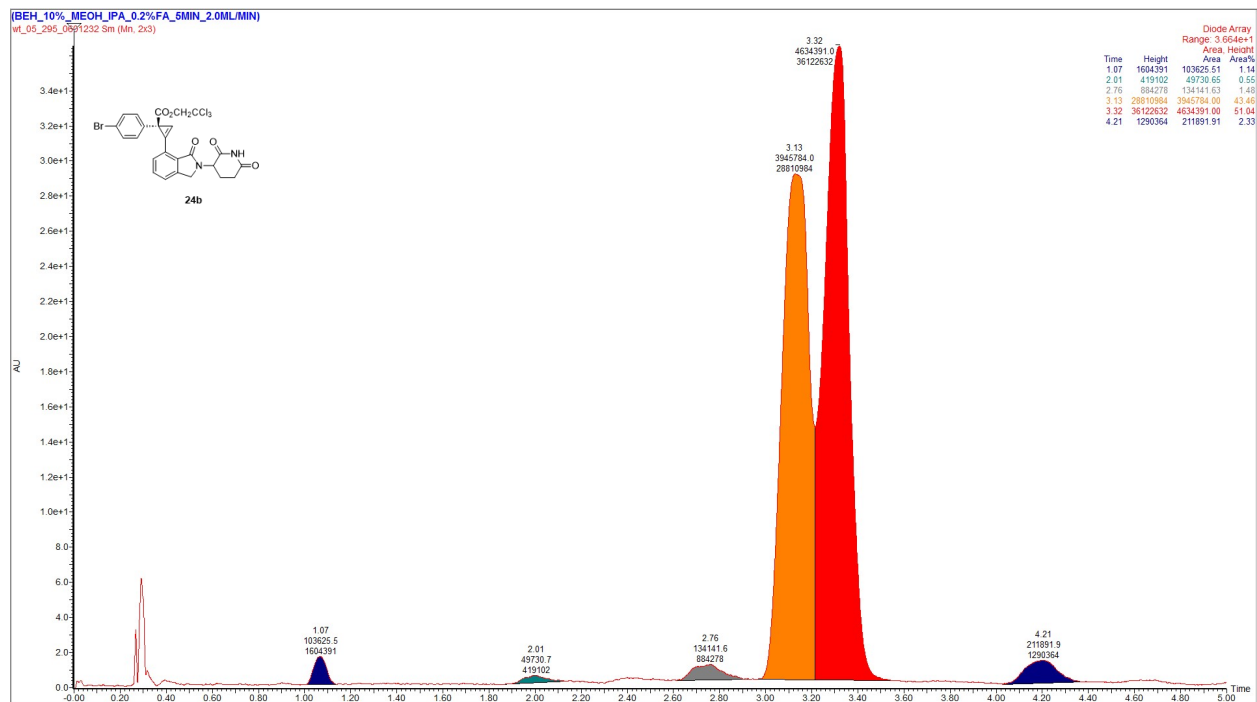

## 25a

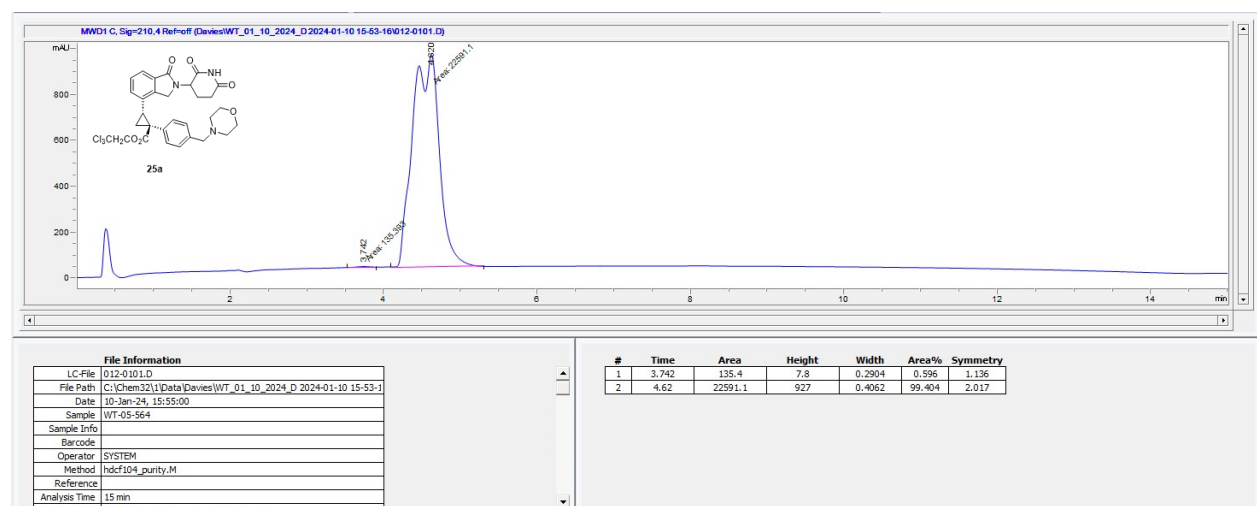

25b

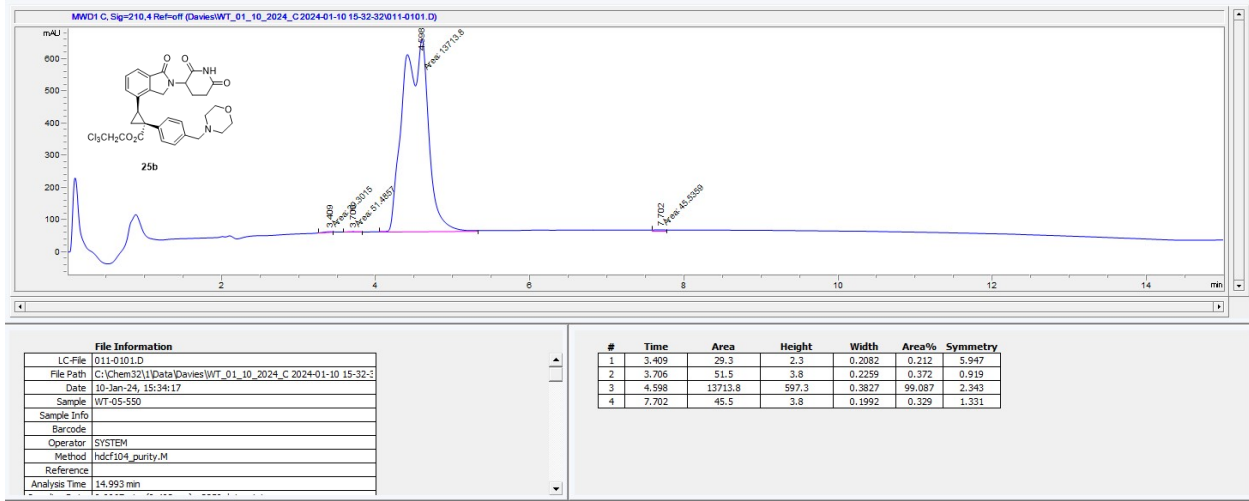

26a

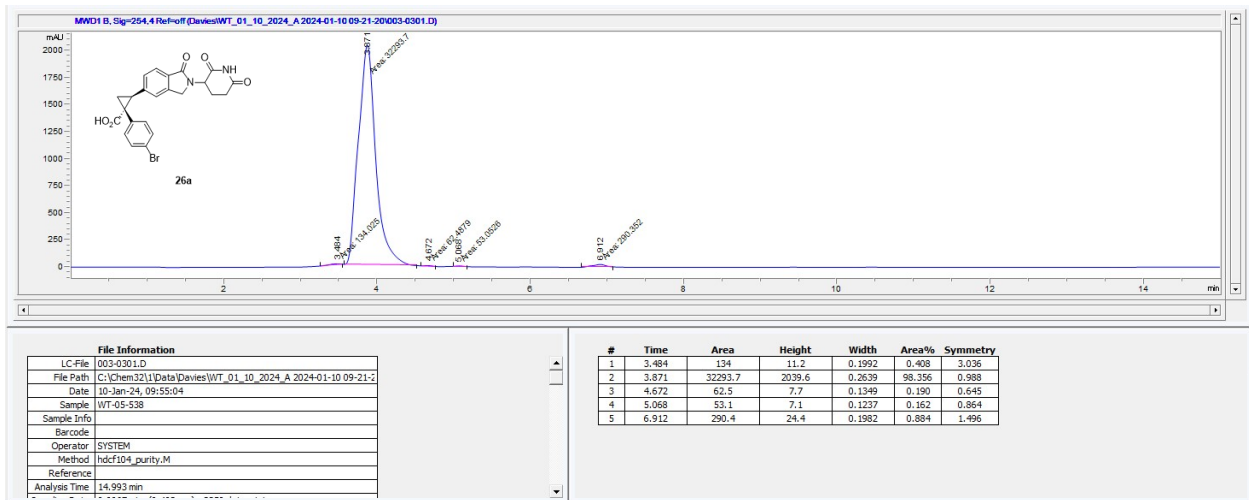



26b

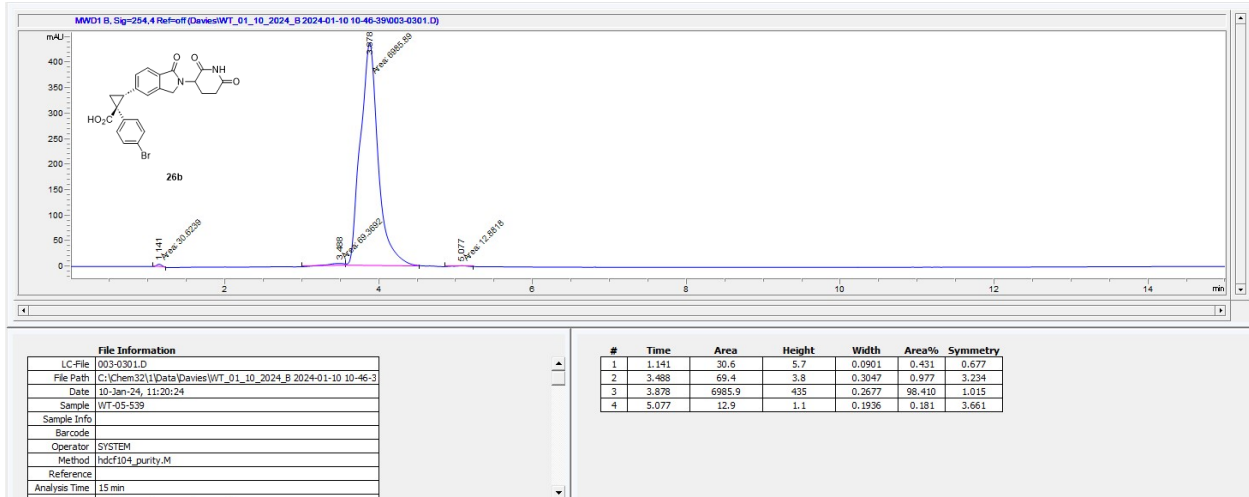

27a

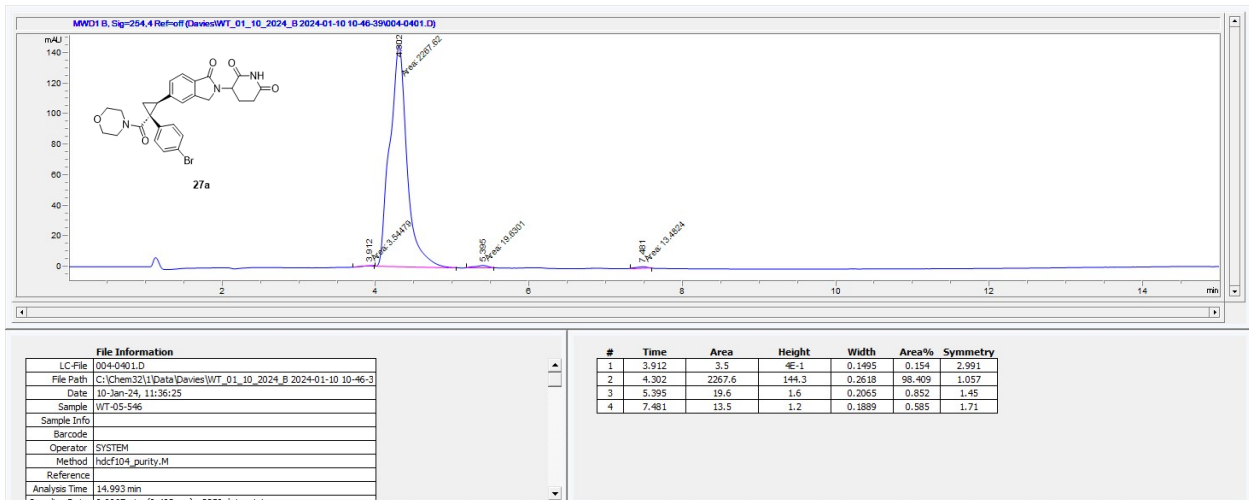

27b

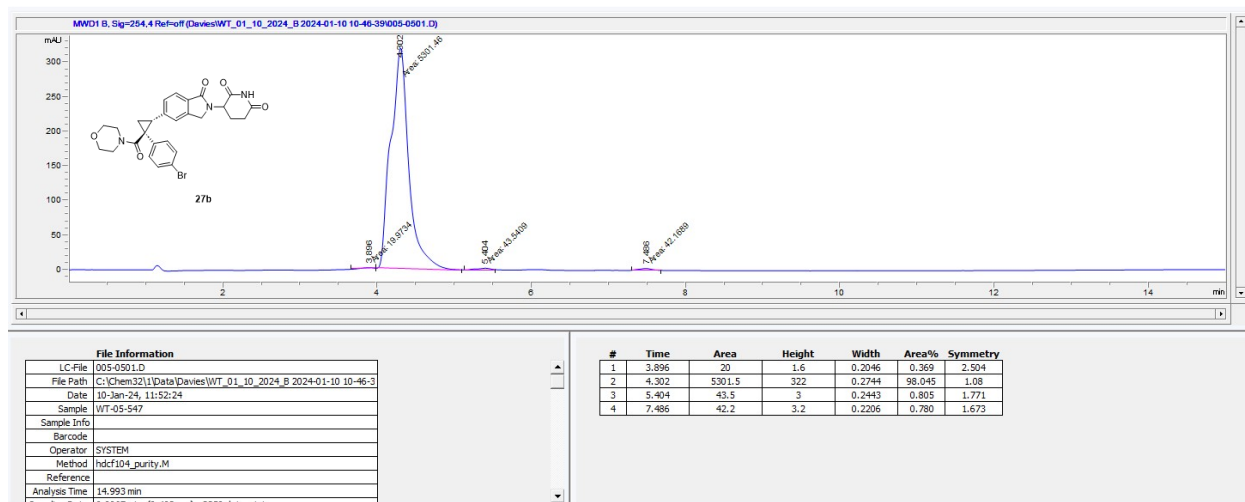

## Section 6: Assay Protocols

### Fluorescence Resonance Energy Transfer-Based NSD@ PWWP Cereblon Binding Assay.

A solution containing 0.5 nM purified 6×His-CRBN\_005-DDB1\_026 (CRBN a.a. 1–442, DDB1 a.a. 1–1140, generated in-house) and 20 nM Tracer compound (CC0782985) was premixed in FRET-assay buffer (50 mM HEPES pH 7.3, 50 mM NaCl, 0.005% Brij35, 1mg/mL BSA and 0.5mM TCEP). Compounds for testing were spotted into a 1536 well plate (Greiner Cat#782075). CRBN and Tracer solution were incubated in compound wells for 20 minutes. Detection mix containing Anti6xHis Tb Crytate (CisBio Cat#61HI2TLF) was then added to assay wells for a final 0.5x assay concentration of detection antibody (stock is provided at 400x). Plates were incubated for 30 minutes before being read on Pherastar FSX plate reader using TR-FRET module (Excitation 340nm, Emission 615/665nm).

### ePL and HiBiT degradation assays

DF15 cells overexpressing ePL tagged GSPT1 (DF15/GSPT1 ePL OE) was used to monitor the degradation of GSPT1 induced by experimental compounds. MDS-L cells overexpressing ePL tagged CK1 $\alpha$  and GSPT1<sup>G575N</sup> (MDS-L/CK1 $\alpha$  ePL OE\_ GSPT1<sup>G575N</sup> OE) was used to monitor the degradation of CK1 $\alpha$  induced by experimental compounds. NCCIT cells with HiBiT tag knocked in at the c-terminus of *SALL4* (NCCIT/SALL4-HiBiT KI) was used to monitor the degradation of SALL4 induced by experimental compounds. DF15 cells with HiBiT tag knocked in at the n-terminus of *IKZF3* (DF15/HiBiT-IKZF3 KI) was used to monitor the degradation of AIOLOS (IKZF3) induced by experimental compounds.

The cell culture medium recipes, seeding densities and compound incubation time with cells are shown in the table below:

| Target       | Cell line                                               | Cell culture medium                                                                                    | Seeding density (cells/well) | Compound incubation time (hr) |
|--------------|---------------------------------------------------------|--------------------------------------------------------------------------------------------------------|------------------------------|-------------------------------|
| GSPT1        | DF15/GSPT1 ePL OE                                       | RPMI 1640, 10% heat inactivated (HI) FBS, 1mM sodium pyruvate, 25mM Hepes, 0.1% pluronic acid, 1X NEAA | 800                          | 20                            |
| CK1 $\alpha$ | MDS-L/CK1 $\alpha$ ePL OE_<br>GSPT1 <sup>G575N</sup> OE | RPMI 1640, 20% HI FBS and 50 ng/mL of human recombinant IL3                                            | 1,000                        | 4                             |
| SALL4        | NCCIT/SALL4-HiBiT KI                                    | RPMI 1640 and 10% HI FBS                                                                               | 800                          | 2                             |
| IKZF3        | DF15/HiBiT-IKZF3 KI                                     | RPMI 1640, 10% HI FBS, 1mM sodium pyruvate, 25mM Hepes, 0.1% pluronic acid, 1X NEAA                    | 800                          | 4                             |

For all degradation assays, compounds were pre-spotted in a 1536 well plate (Corning 3727) starting at 10 $\mu$ M with 3-fold serial dilution down 11 points in replicates using an Echo 650 series acoustic liquid handler. 5 $\mu$ L/well cells were seeded in the assay ready plate at the density and in the medium as indicated in the table. The final DMSO concentration in the cell culture was 0.25%. The plates were equilibrated at room temperature for 30 minutes before putting into a 37 °C CO<sub>2</sub> incubator. After appropriate incubation period, plates were retrieved from the incubator and set at room temperature to equilibrate for 30 minutes, before adding ePL or HiBiT detection reagent. For ePL detection, the pre-prepared mixture of EA reagent, lysis buffer, and substrate reagent at ratio 1:1:4 from the DiscoverX InCELL Detection Kit (Eurofins 96-0079L) according to the manufacturer's recommendation was added 3 $\mu$ L/well into the plate. Plates were incubated in the dark for 1hr at room temperature before reading using a BMG PheraStar luminescence reader. For HiBiT detection, Nano-Glo HiBiT Lytic Reagent (Promega, N3050) prepared according to the manufacturer's recommendation was added 3  $\mu$ L/well into the plate. Plates were incubated 30 minutes at room temperature in the dark before reading using a BMG PheraStar luminescence reader.

To determine EC<sub>50</sub> values for degradation, a four parameter logistic model (Sigmoidal Dose-Response Model) ( $FIT = (A + ((B - A) / (1 + ((C/x)^D))))$ ) C is the inflection point (EC<sub>50</sub>), D is the correlation coefficient, A and B are the low and high limits of the fit respectively) was used to determine the compound's EC<sub>50</sub> value, which is the half maximum effective concentration. In the degradation assays, the Yconst of each compound was calculated by normalizing the lowest point of the fitted curve to the media only control, which is 0%, and the cells treated with DMSO control, which is 100%. All degradation curves were processed and evaluated using Dotmatics.

## Section 7: Biological Data Tables

**Table S7.1: Fluorescence Resonance Energy Transfer-Based Cereblon Binding Assay Data**

| Compound Number | CRBN HTRF IC <sub>50</sub> (μM) |
|-----------------|---------------------------------|
| 13a             | 0.66                            |
| 13b             | 2.4                             |
| 14a             | >10                             |
| 14b             | 7.9                             |
| 15a             | 0.39                            |
| 15b             | 1.3                             |
| 16a             | 5.3                             |
| 16b             | >10                             |
| 17a             | 2.1                             |
| 17b             | 2.5                             |
| 18a             | >10                             |
| 18b             | >10                             |
| 19a             | 0.16                            |
| 19b             | 0.35                            |
| 20a             | 4.6                             |
| 20b             | 35                              |
| 21a             | 0.59                            |
| 21b             | 0.8                             |
| 22a             | 5.7                             |
| 22b             | 7.8                             |
| 23a             | 0.98                            |
| 23b             | 1.7                             |
| 24a             | 2.4                             |
| 24b             | 2.9                             |

**Table S7.2: Neosubstrate Degradation Assay Data\***

| Compound Number | IKZF3 EC <sub>50</sub> (μM) | IKZF3 Y <sub>min</sub> (%) | CK1a EC <sub>50</sub> (μM) | CK1a Y <sub>min</sub> (%) | GSPT1 EC <sub>50</sub> (μM) | GSPT1 Y <sub>min</sub> (%) | SALL4 EC <sub>50</sub> (μM) | SALL4 Y <sub>min</sub> (%) |
|-----------------|-----------------------------|----------------------------|----------------------------|---------------------------|-----------------------------|----------------------------|-----------------------------|----------------------------|
| 13a             | >10 ± 0.00                  | 81 ± 3.3                   | >10 ± 0.00                 | 87 ± 0.55                 | >10 ± 0.00                  | 92 ± 7.8                   | >10 ± 0.00                  | 85 ± 7.3                   |
| 13b             | >10 ± 0.00                  | 97 ± 4.9                   | >10 ± 0.00                 | 90 ± 7.1                  | >10 ± 0.00                  | 99 ± 2.2                   | >10 ± 0.00                  | 97 ± 3.1                   |
| 14a             | >10 ± 0.00                  | 89 ± 3.2                   | >10 ± 0.00                 | 92 ± 3.8                  | >10 ± 0.00                  | 91 ± 16                    | >10 ± 0.00                  | 91 ± 8.0                   |
| 14b             | >10 ± 0.00                  | 95 ± 4.3                   | >10 ± 0.00                 | 94 ± 5.1                  | >10 ± 0.00                  | 87 ± 11                    | >10 ± 0.00                  | 87 ± 13                    |
| 15a             | >10 ± 0.00                  | 100 ± 4.6                  | >10 ± 0.00                 | 89 ± 5.1                  | >10 ± 0.00                  | 96 ± 7.8                   | >10 ± 0.00                  | 99 ± 1.2                   |
| 15b             | >10 ± 0.00                  | 89 ± 5.0                   | 0.22 ± 0.089               | 47 ± 5.0                  | >10 ± 0.00                  | 83 ± 7.0                   | 0.16 ± 0.05                 | 67 ± 5.4                   |
| 16a             | >10 ± 0.00                  | 94 ± 8.3                   | >10 ± 0.00                 | 94 ± 9.9                  | >10 ± 0.00                  | 94 ± 11                    | >10 ± 0.00                  | 92 ± 8.2                   |
| 16b             | >10 ± 0.00                  | 97 ± 3.6                   | >10 ± 0.00                 | 85 ± 4.1                  | >10 ± 0.00                  | 86 ± 8.2                   | 0.41 ± 0.16                 | 60 ± 6.1                   |
| 17a             | >10 ± 0.00                  | 95 ± 7.6                   | >10 ± 0.00                 | 98 ± 12                   | >10 ± 0.00                  | 95 ± 5.4                   | >10 ± 0.00                  | 97 ± 2.2                   |
| 17b             | >10 ± 0.00                  | 89 ± 6.5                   | >10 ± 0.00                 | 96 ± 12                   | >10 ± 0.00                  | 93 ± 5.8                   | >10 ± 0.00                  | 96 ± 3.1                   |
| 18a             | >10 ± 0.00                  | 91 ± 0.6                   | >10 ± 0.00                 | 89 ± 1.7                  | >10 ± 0.00                  | 87 ± 6.5                   | >10 ± 0.00                  | 93 ± 3.8                   |

|            |               |           |             |          |             |            |               |          |
|------------|---------------|-----------|-------------|----------|-------------|------------|---------------|----------|
| <b>18b</b> | >10 ± 0.00    | 96 ± 5.7  | >10 ± 0.00  | 91 ± 7.1 | >10 ± 0.00  | 83 ± 15    | >10 ± 0.00    | 96 ± 5.4 |
| <b>19a</b> | 0.012 ± 0.010 | 7.9 ± 1.8 | 0.17 ± 0.18 | 64 ± 4.3 | 0.17 ± 0.13 | 64 ± 8.7   | 0.019 ± 0.010 | 23 ± 4.5 |
| <b>19b</b> | 0.11 ± 0.05   | 69 ± 3.3  | 1.5 ± 1.1   | 60 ± 7.4 | 0.55 ± 0.47 | 66 ± 5.5   | 0.17 ± 0.06   | 35 ± 5.9 |
| <b>20a</b> | 0.90 ± 0.18   | 40 ± 2.2  | 1.5 ± 0.94  | 56 ± 14  | 4.3 ± 1.9   | 12 ± 13    | 0.56 ± 0.27   | 34 ± 7.4 |
| <b>20b</b> | 3.7 ± 0.62    | 10 ± 8.2  | 2.1 ± 1.3   | 54 ± 8.9 | 5.1 ± 1.4   | 17 ± 13    | 2.8 ± 1.6     | 57 ± 7.7 |
| <b>21a</b> | >10 ± 0.00    | 95 ± 7.6  | >10 ± 0.00  | 89 ± 9.3 | >10 ± 0.00  | 81 ± 17    | >10 ± 0.00    | 89 ± 4.2 |
| <b>21b</b> | 4.8 ± 2.6     | 79 ± 6.4  | 0.25 ± 0.37 | 57 ± 8.0 | 3.3 ± 3.0   | 7.7 ± 4.7  | 0.075 ± 0.050 | 68 ± 2.1 |
| <b>22a</b> | 1.3 ± 2.1     | 73 ± 6.2  | 1.2 ± 1.2   | 60 ± 26  | 1.1 ± 0.69  | 2.7 ± 0.7  | 3.6 ± 0.74    | 67 ± 7.8 |
| <b>22b</b> | 0.31 ± 0.11   | 71 ± 9.7  | 1.6 ± 0.71  | 55 ± 39  | 1.4 ± 0.88  | 1.8 ± 0.86 | 2.4 ± 1.7     | 58 ± 3.2 |
| <b>23a</b> | >10 ± 0.00    | 94 ± 2.3  | >10 ± 0.00  | 93 ± 10  | >10 ± 0.00  | 82 ± 7.1   | >10 ± 0.00    | 95 ± 6.5 |
| <b>23b</b> | >10 ± 0.00    | 81 ± 4.6  | >10 ± 0.00  | 95 ± 6.0 | >10 ± 0.00  | 88 ± 10    | >10 ± 0.00    | 91 ± 10  |
| <b>24a</b> | >10 ± 0.00    | 97 ± 0.58 | >10 ± 0.00  | 96 ± 12  | >10 ± 0.00  | 85 ± 24    | >10 ± 0.00    | 95 ± 5.0 |
| <b>24b</b> | >10 ± 0.00    | 93 ± 2.5  | >10 ± 0.00  | 93 ± 6.8 | >10 ± 0.00  | 80 ± 4.3   | >10 ± 0.00    | 97 ± 5.2 |

\* N ≥ 3 for all data

## Section 8: References

1. Qin, C.; Davies, H. M. L., Role of Sterically Demanding Chiral Dirhodium Catalysts in Site-Selective C–H Functionalization of Activated Primary C–H Bonds. *Journal of the American Chemical Society* **2014**, *136*, 9792-9796.
2. Garlets, Z. J.; Boni, Y. T.; Sharland, J. C.; Kirby, R. P.; Fu, J.; Bacsa, J.; Davies, H. M. L., Design, Synthesis, and Evaluation of Extended C<sub>4</sub>-Symmetric Dirhodium Tetracarboxylate Catalysts. *ACS Catalysis* **2022**, *12*, 10841-10848.
3. Tracy, W. F.; Davies, G. H. M.; Grant, L. N.; Ganley, J. M.; Moreno, J.; Cherney, E. C.; Davies, H. M. L., Anhydrous and Stereoretentive Fluoride-Enhanced Suzuki–Miyaura Coupling of Immunomodulatory Imide Drug Derivatives. *The Journal of Organic Chemistry* **2024**.
4. Berlin, M.; Dong, H.; Sherman, D.; Snyder, L.; Wang, J.; Zhang, W. Bifunctional Molecules Containing an E3 Ubiquitin Ligase Binding Moiety Linked to a BCL6 Targeting Moiety. US 2022323547A1 2021.
5. Tortoreto, C.; Rackl, D.; Davies, H. M. L., Metal-Free C–H Functionalization of Alkanes by Aryldiazoacetates. *Organic Letters* **2017**, *19*, 770-773.
6. Tilden, J. A. R.; Lubben, A. T.; Reeksting, S. B.; Kociok-Köhn, G.; Frost, C. G., Pd(II)-Mediated C–H Activation for Cysteine Bioconjugation. *Chemistry – A European Journal* **2022**, *28*, e202104385.
